# Supplementary material for: Is famine exposure during developmental life in rural Bangladesh associated with a metabolic and epigenetic signature in young adulthood? A historical cohort study
Source: PubMed Central journal article supplement — BMJ Open. 2016 Nov 23;6(11):e011768. doi: 10.1136/bmjopen-2016-011768 (PMC5168545; doi:10.1136/bmjopen-2016-011768), 2016-11-23
Supplement: bmjopen-2016-011768supp_1.pdf [file bmjopen-2016-011768supp_1.pdf]

| Variable                                |                        |                           |                                 |                    |             |
|-----------------------------------------|------------------------|---------------------------|---------------------------------|--------------------|-------------|
| Sex                                     | 42% Male               | 58% Female                |                                 |                    |             |
| Wealth index                            | 23% poorest            | 15% poor                  | 22% middle class                | 20% rich           | 19% richest |
| Marital status                          | 20% never married      | 79% married               | 1% divorced, widowed, separated |                    |             |
| Employment                              | 21% manual worker      | 21% non-manual worker     | 49% housewife                   | 9% unemployed      |             |
| Educational level                       | 36% illiterate         | 18% primary school        | 27% secondary school            | 18% post-secondary |             |
| Smoking status                          | 78% not current smoker | 22% current smoker        |                                 |                    |             |
|                                         | <b>Mean</b>            | <b>standard deviation</b> |                                 |                    |             |
| Age at follow up (years)                | 29.5                   | 1.3                       |                                 |                    |             |
| 0 minutes glucose (mmol/l)              | 4.7                    | 0.5                       |                                 |                    |             |
| 120 minutes glucose (mmol/l)            | 5.5                    | 1.7                       |                                 |                    |             |
| Systolic blood pressure (mmHg)          | 104.3                  | 11.6                      |                                 |                    |             |
| Diastolic blood pressure (mmHg)         | 62.2                   | 8.6                       |                                 |                    |             |
| Height (cm)                             | 156.3                  | 8.2                       |                                 |                    |             |
| Weight (kg)                             | 48.9                   | 7.9                       |                                 |                    |             |
| Body mass index (kg/m <sup>2</sup> )    | 20.0                   | 2.9                       |                                 |                    |             |
| Waist circumference (cm)                | 0.8                    | 0.7                       |                                 |                    |             |
| HDL cholesterol (mmol/l)                | 1.0                    | 0.2                       |                                 |                    |             |
| Triglycerides (mmol/l)                  | 1.0                    | 0.7                       |                                 |                    |             |
| LDL cholesterol (mmol/l)                | 4.0                    | 0.9                       |                                 |                    |             |
| Total cholesterol (mmol/l)              | 4.2                    | 1.1                       |                                 |                    |             |
| Total cholesterol:HDL cholesterol ratio | 2.6                    | 0.7                       |                                 |                    |             |

**Supplementary table 1: Clinical and socio-demographic characteristics of the participants studied (n=219).**

| Gene name   | Chr | Start       | Stop        | 450k array probes (n) | Annotation   | ANOVA           |         |         | p value | p value significance | Post-hoc pairwise comparison (Bonferroni) |      |      |
|-------------|-----|-------------|-------------|-----------------------|--------------|-----------------|---------|---------|---------|----------------------|-------------------------------------------|------|------|
|             |     |             |             |                       |              | Group A         | Group B | Group C |         |                      | AvsB                                      | AvsC | BvsC |
|             |     |             |             |                       |              | Mean beta value |         |         |         |                      |                                           |      |      |
| VTRNA2-1    | 5   | 135,415,762 | 135,416,613 | 15                    | Overlaps TSS | 0.369           | 0.331   | 0.322   | 0.0006  | ***                  | *                                         | ***  | ns   |
| PAX8        | 2   | 113,992,762 | 113,993,313 | 8                     | Gene body    | 0.707           | 0.771   | 0.730   | <0.0001 | ****                 | ****                                      | ns   | **   |
| PRDM9       | 5   | 23,507,030  | 23,507,752  | 7                     | Overlaps TSS | 0.721           | 0.656   | 0.720   | <0.0001 | ****                 | ****                                      | ns   | **** |
| HLA-DQB2    | 6   | 32,729,442  | 32,729,847  | 15                    | Gene body    | 0.764           | 0.750   | 0.768   | 0.154   | ns                   |                                           |      |      |
| PLD6        | 17  | 17,109,570  | 17,110,120  | 8                     | Overlaps TSS | 0.141           | 0.131   | 0.138   | 0.801   | ns                   |                                           |      |      |
| near ZFP57  | 6   | 29,648,345  | 29,649,024  | 18                    | Intergenic   | 0.677           | 0.618   | 0.683   | <0.0001 | ****                 | ****                                      | ns   | **** |
| AKAP12      | 6   | 151,646,312 | 151,647,133 | 9                     | Overlaps TSS | 0.171           | 0.166   | 0.183   | 0.684   | ns                   |                                           |      |      |
| ATP5B       | 12  | 57,040,045  | 57,040,204  | 3                     | Promoter     | 0.046           | 0.041   | 0.043   | 0.852   | ns                   |                                           |      |      |
| LRRC14B     | 5   | 191,242     | 192,103     | 11                    | Overlaps TSS | 0.352           | 0.351   | 0.344   | 0.866   | ns                   |                                           |      |      |
| SPG20       | 13  | 36,944,640  | 36,944,649  | 2                     | Promoter     | 0.905           | 0.900   | 0.904   | 0.671   | ns                   |                                           |      |      |
| near BOLA   | 2   | 74357713    | 74357851    | 5                     | Intergenic   | 0.537           | 0.603   | 0.586   | 0.048   | *                    | ns                                        | ns   | ns   |
| RBM46       | 4   | 155702411   | 155702351   | 11                    | Overlaps TSS | 0.741           | 0.729   | 0.737   | 0.528   | ns                   |                                           |      |      |
| ZFYVE28     | 4   | 2366672     | 2367137     | 7                     | Gene body    | 0.560           | 0.550   | 0.548   | 0.844   | ns                   |                                           |      |      |
| EXD3        | 9   | 140311919   | 140311437   | 3                     | 5' UTR       | 0.671           | 0.623   | 0.663   | 0.009   | **                   | *                                         | ns   | ns   |
| PARD6G      | 18  | 77918588    | 77918142    | 4                     | Gene body    | 0.547           | 0.514   | 0.538   | 0.599   | ns                   |                                           |      |      |
| near ZNF678 | 1   | 227746294   | 227746111   | 3                     | Intergenic   | 0.576           | 0.563   | 0.583   | 0.769   | ns                   |                                           |      |      |

**Supplementary Table 2. Mean methylation across all probes within (+/- 500bp) of metastable epialleles described by Dominguez-Salasz (Nature Comms, 2014) and Silver (Genome Biol, 2015).**

| UCSC_RefGene_Name | 450k probe | CHR  | MAPINFO   |
|-------------------|------------|------|-----------|
| VTRNA2-1/MIR886   | cg00124993 | chr5 | 135416412 |
|                   | cg06536614 | chr5 | 135416381 |
|                   | cg11608150 | chr5 | 135415948 |
|                   | cg25340688 | chr5 | 135416398 |
|                   | cg26328633 | chr5 | 135416394 |
|                   | cg26896946 | chr5 | 135416405 |
|                   | cg04481923 | chr5 | 135416205 |
|                   | cg04515200 | chr5 | 135415762 |
|                   | cg06478886 | chr5 | 135416029 |
|                   | cg08745965 | chr5 | 135416529 |
|                   | cg11978884 | chr5 | 135415819 |
|                   | cg13581155 | chr5 | 135415781 |
|                   | cg16615357 | chr5 | 135416594 |
|                   | cg18678645 | chr5 | 135416331 |
|                   | cg18797653 | chr5 | 135416613 |
| PAX8              | cg07594247 | chr2 | 113993304 |
|                   | cg07772999 | chr2 | 113993052 |
|                   | cg11763394 | chr2 | 113992921 |
|                   | cg12889195 | chr2 | 113992843 |
|                   | cg21550016 | chr2 | 113992930 |
|                   | cg17445212 | chr2 | 113993313 |
|                   | cg19083407 | chr2 | 113993142 |
|                   | cg21482265 | chr2 | 113992762 |
| PRDM9             | cg02444433 | chr5 | 23507469  |
|                   | cg19837938 | chr5 | 23507458  |
|                   | cg22054885 | chr5 | 23507450  |
|                   | cg25472530 | chr5 | 23507617  |
|                   | cg01667892 | chr5 | 23507656  |
|                   | cg10589310 | chr5 | 23507030  |
|                   | cg22079902 | chr5 | 23507644  |
| HLADQB2           | cg02964065 | chr6 | 32729545  |
|                   | cg04322111 | chr6 | 32729764  |
|                   | cg09739413 | chr6 | 32729498  |
|                   | cg10218546 | chr6 | 32729823  |
|                   | cg10714510 | chr6 | 32729465  |
|                   | cg13896204 | chr6 | 32729442  |

|            |            |       |           |
|------------|------------|-------|-----------|
|            | cg14441480 | chr6  | 32729500  |
|            | cg15255946 | chr6  | 32729563  |
|            | cg18026055 | chr6  | 32729596  |
|            | cg21139325 | chr6  | 32729470  |
|            | cg23418102 | chr6  | 32729847  |
|            | cg24298476 | chr6  | 32729808  |
|            | cg25327122 | chr6  | 32729782  |
|            | cg03638120 | chr6  | 32729720  |
|            | cg17475271 | chr6  | 32729741  |
| PLD6       | cg03292213 | chr17 | 17109640  |
|            | cg05590257 | chr17 | 17109570  |
|            | cg11392858 | chr17 | 17109651  |
|            | cg14099398 | chr17 | 17109800  |
|            | cg16340422 | chr17 | 17110120  |
|            | cg23661344 | chr17 | 17109678  |
|            | cg26539818 | chr17 | 17109691  |
|            | cg02880176 | chr17 | 17109817  |
| Near ZFP57 | cg03198009 | chr6  | 29648604  |
|            | cg07134666 | chr6  | 29648400  |
|            | cg08022281 | chr6  | 29648345  |
|            | cg08041448 | chr6  | 29648901  |
|            | cg10648573 | chr6  | 29648348  |
|            | cg11383134 | chr6  | 29648590  |
|            | cg22494932 | chr6  | 29648379  |
|            | cg00588198 | chr6  | 29648452  |
|            | cg02157626 | chr6  | 29648736  |
|            | cg03449857 | chr6  | 29648623  |
|            | cg06032337 | chr6  | 29648468  |
|            | cg12644888 | chr6  | 29648360  |
|            | cg13835168 | chr6  | 29648756  |
|            | cg15570656 | chr6  | 29648628  |
|            | cg16885113 | chr6  | 29648507  |
|            | cg20228636 | chr6  | 29648525  |
|            | cg24100841 | chr6  | 29649024  |
|            | cg25699073 | chr6  | 29648381  |
| AKAP12     | cg04221606 | chr6  | 151646552 |
|            | cg12794224 | chr6  | 151646761 |
|            | cg15892964 | chr6  | 151646540 |
|            | cg24322333 | chr6  | 151646584 |

|            |            |           |           |
|------------|------------|-----------|-----------|
|            | cg03446012 | chr6      | 151646601 |
|            | cg06019170 | chr6      | 151646957 |
|            | cg08224159 | chr6      | 151646312 |
|            | cg18245460 | chr6      | 151646651 |
|            | cg25855249 | chr6      | 151646817 |
| SNORD59A   | cg06679265 | chr12     | 57040204  |
|            | cg03249590 | chr12     | 57040199  |
|            | cg05555643 | chr12     | 57040061  |
| LRR14B     | cg01239922 | chr5      | 191242    |
|            | cg15351009 | chr5      | 191486    |
|            | cg19858576 | chr5      | 191806    |
|            | cg00607051 | chr5      | 191500    |
|            | cg03553576 | chr5      | 191296    |
|            | cg12711961 | chr5      | 191600    |
|            | cg13787932 | chr5      | 191793    |
|            | cg15730313 | chr5      | 191628    |
|            | cg18443893 | chr5      | 192103    |
|            | cg24696500 | chr5      | 191492    |
|            | cg26866348 | chr5      | 191547    |
| SPG20      | cg09410612 | chr13     | 36944649  |
|            | cg13486491 | chr13     | 36944640  |
| Near BOLA  | cg05890377 | 2         | 74357713  |
|            | cg01017244 | 2         | 74357527  |
|            | cg19325132 | 2         | 74358223  |
|            | cg19729930 | 2         | 74357872  |
|            | cg20891558 | 2         | 74357851  |
|            | cg07594247 | 2         | 113993304 |
|            | cg07772999 | 2         | 113993052 |
|            | cg11763394 | 2         | 113992921 |
|            | cg12889195 | 2         | 113992843 |
|            | cg21550016 | 2         | 113992930 |
|            | cg17445212 | 2         | 113993313 |
|            | cg19083407 | 2         | 113993142 |
| cg21482265 | 2          | 113992762 |           |
| RBM46      | cg08282428 | 4         | 155702411 |
|            | cg19340941 | 4         | 155702931 |
|            | cg22103164 | 4         | 155702409 |
|            | cg00137234 | 4         | 155703138 |
|            | cg02992596 | 4         | 155702220 |

|             |            |    |           |
|-------------|------------|----|-----------|
|             | cg04355617 | 4  | 155703429 |
|             | cg06318837 | 4  | 155702341 |
|             | cg10920378 | 4  | 155702172 |
|             | cg22496683 | 4  | 155702610 |
|             | cg23483495 | 4  | 155702533 |
|             | cg26413432 | 4  | 155702351 |
| ZFYVE28     | cg03137131 | 4  | 2366672   |
|             | cg10622551 | 4  | 2366555   |
|             | cg00856997 | 4  | 2366103   |
|             | cg02937671 | 4  | 2366485   |
|             | cg09884451 | 4  | 2366831   |
|             | cg10635092 | 4  | 2367091   |
|             | cg13688770 | 4  | 2367137   |
| EXD3        | cg21251970 | 9  | 140311919 |
|             | cg23928763 | 9  | 140312446 |
|             | cg06433816 | 9  | 140311437 |
| PARD6G      | cg07500432 | 18 | 77918588  |
|             | cg13590055 | 18 | 77917647  |
|             | cg19815565 | 18 | 77917615  |
|             | cg21237861 | 18 | 77918142  |
| Near ZNF678 | cg22344745 | 1  | 227746294 |
|             | cg08111158 | 1  | 227746191 |
|             | cg21436055 | 1  | 227746111 |

**Supplementary table 3. Genomic coordinates of metastable epialleles and related 450k probes (cg...)**
