# Supplementary material for: Is famine exposure during developmental life in rural Bangladesh associated with a metabolic and epigenetic signature in young adulthood? A historical cohort study
Source: PubMed Central journal article supplement — BMJ Open. 2016 Nov 23;6(11):e011768. doi: 10.1136/bmjopen-2016-011768 (PMC5168545; doi:10.1136/bmjopen-2016-011768), 2016-11-23
Supplement: bmjopen-2016-011768supp_2.pdf [file bmjopen-2016-011768supp_2.pdf]

Barbados – postnatal exposure to protein-energy malnutrition – Peter, Biol Psychiatry 2016

<http://www.sciencedirect.com/science/article/pii/S0006322316322338>

|            | CHR   | MAPINFO   | Probe_SNPs  | UCSC_RefGene | UCSC_RefGene | UCSC_CpG_Is  |
|------------|-------|-----------|-------------|--------------|--------------|--------------|
| cg14793544 | chr6  | 30538842  | NA          | ABCF1;ABCF1  | TSS1500;TSS  | chr6:305389  |
| cg05554000 | chr7  | 158905015 | rs143711415 | VIPR2        | Body         | chr7:158905  |
| cg18015044 | chr6  | 30538844  | NA          | ABCF1;ABCF1  | TSS1500;TSS  | chr6:305389  |
| cg13444538 | chr7  | 158905317 | NA          | VIPR2        | Body         | chr7:158905  |
| cg13835168 | chr6  | 29648756  | rs416560    |              |              |              |
| cg08041448 | chr6  | 29648901  | rs2747432   |              |              |              |
| cg00678158 | chr6  | 30538836  | NA          | ABCF1;ABCF1  | TSS1500;TSS  | chr6:305389  |
| cg19636627 | chr6  | 29649084  | rs3131847   |              |              |              |
| cg16885113 | chr6  | 29648507  | NA          |              |              |              |
| cg26343358 | chr6  | 31275666  | rs1619716   |              |              | chr6:312762  |
| cg00588198 | chr6  | 29648452  | rs3129057   |              |              |              |
| cg13774539 | chr2  | 74612706  | rs73948791  | LOC1001895   | TSS200       |              |
| cg11383134 | chr6  | 29648590  | rs114184656 |              |              |              |
| cg20228636 | chr6  | 29648525  | rs2747431   |              |              |              |
| cg07134666 | chr6  | 29648400  | rs17184563  |              |              |              |
| cg03899827 | chr7  | 158905377 | rs137924839 | VIPR2        | Body         | chr7:158905  |
| cg20874785 | chr2  | 74612674  | rs73948791  | LOC1001895   | TSS200       |              |
| cg24100841 | chr6  | 29649024  | rs3129054   |              |              |              |
| cg25107000 | chr6  | 31275643  | rs34196875  |              |              | chr6:312762  |
| cg18502630 | chr9  | 139871955 | NA          | PTGDS;PTGD   | 5'UTR;1stExo | chr9:139872  |
| cg21862126 | chr1  | 1076296   | NA          |              |              | chr1:107236  |
| cg08479516 | chr7  | 158905536 | NA          | VIPR2        | Body         | chr7:158905  |
| cg22098660 | chr4  | 6107339   | NA          | JAKMIP1;JAK  | Body;Body    | chr4:610713  |
| cg08620751 | chr19 | 1851750   | NA          |              |              | chr19:18515  |
| cg11719157 | chr17 | 1466715   | NA          | PITPNA       | TSS1500      | chr17:14651  |
| cg24297727 | chr6  | 30538686  | NA          | ABCF1;ABCF1  | TSS1500;TSS  | chr6:305389  |
| cg13312337 | chr2  | 74612759  | NA          | LOC1001895   | TSS200       |              |
| cg22494932 | chr6  | 29648379  | rs17184563  |              |              |              |
| cg00986350 | chr16 | 88540396  | rs114362790 | ZFPM1        | Body         | chr16:88539  |
| cg06697425 | chr17 | 72915897  | NA          | USH1G        | Body         | chr17:72915  |
| cg21003654 | chr4  | 6107633   | NA          | JAKMIP1;JAK  | Body;Body    | chr4:610713  |
| cg17560136 | chr8  | 21915510  | NA          | EPB49;EPB49  | 5'UTR;TSS15  | (chr8:219142 |
| cg07194846 | chr22 | 19930177  | rs737864    | COMT;TXNR1   | 5'UTR;TSS15  | (chr22:19929 |
| cg14801238 | chr6  | 31275664  | rs1619716   |              |              | chr6:312762  |
| cg12097325 | chr1  | 1076431   | NA          |              |              | chr1:107236  |
| cg16046667 | chr20 | 35422698  | NA          | C20orf117;C  | Body;Body    | chr20:35422  |
| cg25699073 | chr6  | 29648381  | rs17184563  |              |              |              |
| cg11794033 | chr6  | 31275267  | rs2853915   |              |              | chr6:312762  |
| cg20426671 | chr17 | 1466709   | NA          | PITPNA       | TSS1500      | chr17:14651  |
| cg16724588 | chr4  | 6107131   | NA          | JAKMIP1;JAK  | Body;Body    | chr4:610713  |
| cg02157626 | chr6  | 29648736  | NA          |              |              |              |

|            |       |           |             |             |                          |
|------------|-------|-----------|-------------|-------------|--------------------------|
| cg27258561 | chr6  | 31275767  | rs28600230  |             | chr6:312762              |
| cg02211646 | chr7  | 114055210 | NA          | FOXP2;FOXP  | 1stExon;5'UTR;5'UTR;1stE |
| cg19544441 | chr11 | 67211701  | NA          | CORO1B;COF  | TSS1500;TSS1500          |
| cg04026699 | chr6  | 28834513  | NA          |             | chr6:288316              |
| cg04585822 | chr17 | 72916509  | rs111033465 | USH1G       | Body chr17:72915         |
| cg14141448 | chr6  | 30538684  | NA          | ABCF1;ABCF  | 1TSS1500;TSS:chr6:305389 |
| cg27071793 | chr6  | 31275718  | rs28600230  |             | chr6:312762              |
| cg05232889 | chr7  | 114055419 | NA          | FOXP2;FOXP  | 5'UTR;5'UTR;5'UTR        |
| cg08158662 | chr12 | 34489995  | NA          |             | chr12:34489              |
| cg06231140 | chr4  | 6107320   | NA          | JAKMIP1;JAK | Body;Body chr4:610713    |
| cg03077533 | chr2  | 121107326 | NA          | INHBB       | Body chr2:121106         |
| cg22502625 | chr14 | 103568366 | rs113344928 | C14orf73    | Body chr14:10356         |
| cg22667835 | chr4  | 6107791   | rs10000296  | JAKMIP1;JAK | Body;Body chr4:610713    |
| cg26690742 | chr11 | 2889602   | NA          |             | chr11:28903              |
| cg00508131 | chr16 | 333153    | rs45519642  | PDIA2;PDIA2 | 5'UTR;1stExo chr16:33444 |
| cg05308117 | chr19 | 48547362  | rs35637404  | CABP5       | TSS200                   |
| cg25145670 | chr17 | 46655164  | NA          | HOXB4       | Body chr17:46655         |
| cg24786986 | chr7  | 114055133 | NA          | FOXP2;FOXP  | 1stExon;5'UTR;5'UTR;1stE |
| cg00743717 | chr17 | 36831977  | rs4795309   | C17orf96    | TSS1500 chr17:36829      |
| cg01638101 | chr2  | 74612812  | NA          | LOC1001895  | TSS200                   |
| cg11073255 | chr6  | 31762455  | NA          | VARS        | Body chr6:317632         |
| cg23166781 | chr4  | 6107280   | NA          | JAKMIP1;JAK | Body;Body chr4:610713    |
| cg22674497 | chr17 | 72916000  | NA          | USH1G       | Body chr17:72915         |
| cg02446475 | chr6  | 31275807  | rs1634760   |             | chr6:312762              |
| cg18994250 | chr4  | 6107021   | rs11735262  | JAKMIP1;JAK | Body;Body chr4:610713    |
| cg18420781 | chr6  | 30124240  | NA          | TRIM10;TRIM | Body;Body                |
| cg20795372 | chr6  | 30419612  | rs9295885   |             | chr6:304188              |
| cg13382072 | chr19 | 1851882   | NA          |             | chr19:18515              |
| cg21045547 | chr20 | 35422703  | rs61732362  | C20orf117;C | Body;Body chr20:35422    |
| cg10605977 | chr10 | 133961265 | NA          | JAKMIP3     | Body                     |
| cg02780849 | chr1  | 235814163 | NA          | GNG4;GNG4   | TSS1500;TSS:chr1:235814  |
| cg04464062 | chr16 | 88540349  | rs114362790 | ZFPM1       | Body chr16:88539         |
| cg25981998 | chr6  | 30124248  | NA          | TRIM10;TRIM | Body;Body                |
| cg17988187 | chr2  | 74612222  | NA          | LOC1001895  | TSS1500                  |
| cg18871253 | chr7  | 114055137 | NA          | FOXP2;FOXP  | 1stExon;5'UTR;5'UTR;1stE |
| cg07620992 | chr6  | 33421963  | NA          | ZBTB9       | TSS1500 chr6:334220      |
| cg13175159 | chr1  | 79472643  | NA          | ELTD1       | TSS200 chr1:794722       |
| cg06672250 | chr8  | 21914593  | NA          | EPB49;EPB49 | TSS1500;5'U chr8:219142  |
| cg25978138 | chr6  | 29648161  | rs3129058   |             |                          |
| cg07678583 | chr20 | 42142224  | NA          | L3MBTL;L3M  | TSS1500;TSS:chr20:42143  |
| cg06281297 | chr11 | 2890190   | NA          | KCNQ1DN     | TSS1500 chr11:28903      |
| cg12076350 | chr6  | 31275791  | rs3873388   |             | chr6:312762              |
| cg08787968 | chr11 | 32451777  | NA          | WT1;WT1;W   | Body;Body;B chr11:32452  |
| cg02779948 | chr10 | 70092852  | NA          | PBLD;HNRNP  | TSS200;5'UT chr10:70091  |
| cg12814335 | chr17 | 1466713   | NA          | PITPNA      | TSS1500 chr17:14651      |

|            |       |           |             |             |                          |              |
|------------|-------|-----------|-------------|-------------|--------------------------|--------------|
| cg00140112 | chr18 | 3879595   | NA          | DLGAP1      | 1stExon                  | chr18:38792  |
| cg19655952 | chr7  | 114055204 | NA          | FOXP2;FOXP  | 1stExon;5'UTR;5'UTR;1stE |              |
| cg13455717 | chr1  | 235814365 | NA          | GNG4;GNG4;  | TSS1500;TSS              | chr1:235814  |
| cg04360793 | chr1  | 79472361  | NA          | ELTD1;ELTD  | 15'UTR;1stExo            | chr1:794722  |
| cg18534730 | chr19 | 48547448  | NA          | CABP5       | TSS200                   |              |
| cg06099697 | chr16 | 88539861  | NA          | ZFPM1       | Body                     | chr16:88539  |
| cg00891025 | chr8  | 21915184  | rs62493961  | EPB49;EPB4  | 9TSS200;5'UT             | chr8:219142  |
| cg22637837 | chr5  | 140730092 | NA          | PCDHGB1;PC  | 1stExon;Body             | chr5:140731  |
| cg04972348 | chr1  | 1100035   | NA          |             |                          | chr1:109804  |
| cg02931604 | chr6  | 74064298  | NA          | DPPA5       | TSS1500                  | chr6:740635  |
| cg11716608 | chr7  | 65447332  | NA          | GUSB        | TSS200                   | chr7:654467  |
| cg02589685 | chr11 | 2889629   | NA          |             |                          | chr11:28903  |
| cg03198012 | chr5  | 1241099   | NA          | SLC6A18     | Body                     | chr5:124244  |
| cg02932780 | chr6  | 31762353  | rs4713488   | VARS        | Body                     | chr6:317632  |
| cg17736443 | chr6  | 27783054  | NA          | HIST1H2AJ;H | TSS1500;1stE             | chr6:277822  |
| cg22100652 | chr6  | 28834404  | rs6935576   |             |                          | chr6:288316  |
| cg05497216 | chr16 | 89408076  | rs115857356 | ANKRD11     | 5'UTR                    | chr16:89408  |
| cg16430887 | chr4  | 1497223   | rs76137134  |             |                          | chr4:149454  |
| cg15893346 | chr7  | 65447565  | NA          | GUSB        | TSS1500                  | chr7:654467  |
| cg19301742 | chr6  | 33421180  | NA          | SYNGAP1;ZB  | 3'UTR;TSS15              | (chr6:334220 |
| cg23414861 | chr6  | 74064064  | rs185614200 | DPPA5       | TSS200                   | chr6:740635  |
| cg08940169 | chr16 | 88540241  | NA          | ZFPM1       | Body                     | chr16:88539  |
| cg13429614 | chr6  | 31276667  | rs115193934 |             |                          | chr6:312762  |
| cg25841114 | chr6  | 31762901  | NA          | VARS        | Body                     | chr6:317632  |
| cg00270311 | chr16 | 30366760  | NA          | CD2BP2;CD2  | TSS1500;TSS              | chr16:30366  |
| cg15446391 | chr11 | 32452370  | NA          | WT1;WT1;W   | Body;Body;B              | chr11:32452  |
| cg17079325 | chr7  | 130131480 | NA          | MEST;MEST;  | TSS1500;5'U              | chr7:130130  |
| cg20495333 | chr2  | 121107947 | NA          | INHBB       | 3'UTR                    | chr2:121106  |
| cg04344875 | chr7  | 130131484 | NA          | MEST;MEST;  | TSS1500;5'U              | chr7:130130  |
| cg01761710 | chr16 | 333155    | NA          | PDIA2;PDIA  | 2 5'UTR;1stExo           | chr16:33444  |
| cg03555881 | chr6  | 31275551  | rs116704042 |             |                          | chr6:312762  |
| cg00286878 | chr7  | 130131633 | rs73724326  | MEST;MEST;  | TSS1500;5'U              | chr7:130130  |
| cg23723903 | chr1  | 10856466  | rs61645034  | CASZ1;CASZ  | 15'UTR;5'UTR             | chr1:108538  |
| cg22941646 | chr1  | 235814339 | NA          | GNG4;GNG4;  | TSS1500;TSS              | chr1:235814  |
| cg13099117 | chr6  | 30538539  | NA          | ABCF1;ABCF  | 1TSS1500;TSS             | chr6:305389  |
| cg02767759 | chr16 | 30366751  | NA          | CD2BP2;CD2  | TSS1500;TSS              | chr16:30366  |
| cg10021428 | chr4  | 53588038  | NA          |             |                          | chr4:535881  |
| cg18546840 | chr7  | 114055123 | NA          | FOXP2;FOXP  | 1stExon;5'UTR;5'UTR;1stE |              |
| cg01929855 | chr4  | 6107649   | NA          | JAKMIP1;JAK | Body;Body                | chr4:610713  |
| cg06618740 | chr1  | 1100126   | NA          |             |                          | chr1:109804  |
| cg08633313 | chr20 | 42142852  | rs2072978   | L3MBTL;L3M  | TSS200;TSS2              | (chr20:42143 |
| cg10149529 | chr19 | 48547314  | rs35637404  | CABP5       | TSS200                   |              |
| cg12781568 | chr11 | 32452038  | NA          | WT1;WT1;W   | Body;Body;B              | chr11:32452  |
| cg08714996 | chr5  | 140729928 | NA          | PCDHGB1;PC  | 1stExon;Body             | chr5:140731  |
| cg22380472 | chr19 | 2900542   | rs78002149  | ZNF57       | TSS1500                  | chr19:29003  |

|            |       |           |             |             |                          |              |
|------------|-------|-----------|-------------|-------------|--------------------------|--------------|
| cg20684973 | chr10 | 105127632 | rs10883857  | TAF5        | TSS200                   | chr10:105127 |
| cg24716558 | chr17 | 72915784  | NA          | USH1G       | Body                     | chr17:729157 |
| cg13311607 | chr8  | 144451523 | NA          | RHPN1;C8orf | Body;TSS150              | chr8:1444503 |
| cg14848772 | chr6  | 27099813  | NA          | HIST1H2AG   | TSS1500                  | chr6:2710017 |
| cg26413432 | chr4  | 155702351 | NA          | RBM46       | TSS200                   | chr4:1557023 |
| cg25946459 | chr20 | 35422495  | NA          | C20orf117;C | Body;Body                | chr20:354224 |
| cg23948843 | chr2  | 164204752 | NA          |             |                          | chr2:1642047 |
| cg24303888 | chr6  | 30852354  | rs147143466 | DDR1;DDR1;l | 1stExon;5'UT             | chr6:3085210 |
| cg04609859 | chr17 | 46655736  | NA          | HOXB4;HOXE  | 1stExon;5'UT             | chr17:466540 |
| cg09260653 | chr16 | 1486064   | rs111957036 | CCDC154     | Body                     | chr16:148703 |
| cg02992596 | chr4  | 155702220 | NA          | RBM46       | TSS1500                  | chr4:1557023 |
| cg24931658 | chr8  | 21914524  | NA          | EPB49;EPB49 | TSS1500;5'U              | chr8:2191427 |
| cg09747578 | chr1  | 46769076  | NA          | LRRC41;UQC  | TSS200;TSS1              | chr1:4676747 |
| cg11491998 | chr6  | 30419493  | NA          |             |                          | chr6:3041884 |
| cg08149865 | chr8  | 21914600  | NA          | EPB49;EPB49 | TSS1500;5'U              | chr8:2191427 |
| cg03205258 | chr22 | 19929274  | NA          | TXNRD2;COM  | 1stExon;1stE             | chr22:199290 |
| cg21240441 | chr9  | 139872871 | rs148430937 | PTGDS       | Body                     | chr9:1398723 |
| cg21475076 | chr1  | 1100493   | rs79776491  |             |                          | chr1:1098043 |
| cg01306563 | chr7  | 114055074 | NA          | FOXP2;FOXP  | 1stExon;5'UTR;5'UTR;1stE |              |
| cg08805748 | chr6  | 30538523  | NA          | ABCF1;ABCF1 | TSS1500;TSS              | chr6:3053894 |
| cg01467419 | chr19 | 2900365   | rs11084969  | ZNF57       | TSS1500                  | chr19:290036 |
| cg18022926 | chr10 | 70093071  | NA          | PBLD;PBLD;H | TSS1500;TSS              | chr10:700910 |
| cg14105566 | chr2  | 121107846 | NA          | INHBB       | 3'UTR                    | chr2:1211069 |
| cg25407198 | chr7  | 130131268 | NA          | MEST;MEST;l | TSS1500;5'U              | chr7:1301307 |
| cg19187653 | chr6  | 31778919  | NA          | HSPA1L      | Body                     | chr6:3178287 |
| cg17365962 | chr6  | 30538589  | NA          | ABCF1;ABCF1 | TSS1500;TSS              | chr6:3053894 |
| cg20188621 | chr10 | 105127192 | rs72847518  | TAF5        | TSS1500                  | chr10:105127 |
| cg07770370 | chr10 | 133961306 | NA          | JAKMIP3     | Body                     |              |
| cg24938881 | chr2  | 91937035  | NA          |             |                          | chr2:9193687 |
| cg09243445 | chr2  | 237123016 | NA          | ASB18       | Body                     | chr2:2371230 |
| cg20412244 | chr6  | 31276664  | rs115193934 |             |                          | chr6:3127624 |
| cg10433547 | chr16 | 1486536   | NA          | CCDC154     | Body                     | chr16:148703 |
| cg14824543 | chr1  | 1076166   | NA          |             |                          | chr1:1072369 |
| cg09796320 | chr7  | 65447328  | NA          | GUSB        | TSS200                   | chr7:6544677 |
| cg05006231 | chr19 | 1852165   | NA          |             |                          | chr19:185157 |
| cg01878724 | chr6  | 150346921 | NA          | RAET1L      | TSS1500                  |              |
| cg10973146 | chr14 | 103568471 | NA          | C14orf73    | Body                     | chr14:103568 |
| cg01652244 | chr6  | 74063982  | NA          | DPPA5       | TSS200                   | chr6:7406353 |
| cg03228567 | chr6  | 30955421  | NA          | MUC21       | Body                     |              |
| cg22103164 | chr4  | 155702409 | NA          | RBM46       | TSS200                   | chr4:1557023 |
| cg12637448 | chr4  | 1496981   | NA          |             |                          | chr4:1494547 |
| cg19439810 | chr1  | 46768592  | NA          | LRRC41;UQC  | Body;TSS150              | chr1:4676747 |
| cg06805615 | chr6  | 30955716  | NA          | MUC21       | Body                     |              |
| cg14598950 | chr3  | 37035355  | rs4647205   | MLH1;MLH1;  | 1stExon;5'UT             | chr3:3703427 |
| cg16523380 | chr1  | 10856707  | NA          | CASZ1;CASZ1 | TSS200;TSS2              | chr1:1085389 |

|            |       |           |             |             |              |              |
|------------|-------|-----------|-------------|-------------|--------------|--------------|
| cg06857094 | chr6  | 31762442  | NA          | VARS        | Body         | chr6:317632  |
| cg10861005 | chr6  | 33266368  | NA          | RGL2;RGL2   | Body;Body    | chr6:332663  |
| cg12275723 | chr1  | 10856739  | NA          | CASZ1;CASZ1 | TSS200;TSS2  | (chr1:108538 |
| cg15606633 | chr12 | 130824403 | NA          | PIWIL1      | 5'UTR        | chr12:13082  |
| cg19628456 | chr6  | 31779381  | NA          | HSPA1L      | Body         | chr6:317828  |
| cg07803420 | chr6  | 30851517  | NA          | DDR1;DDR1   | TSS1500;TSS  | chr6:308521  |
| cg04714041 | chr19 | 35068710  | NA          | LOC643719   | TSS200       | chr19:35068  |
| cg13377264 | chr6  | 30419135  | rs17188876  |             |              | chr6:304188  |
| cg19132762 | chr3  | 37034739  | NA          | EPM2AIP1;M5 | UTR;TSS15    | (chr3:370342 |
| cg23878471 | chr6  | 30419063  | rs11753256  |             |              | chr6:304188  |
| cg22457903 | chr20 | 42142417  | NA          | L3MBTL;L3M  | TSS1500;TSS  | chr20:42143  |
| cg13581155 | chr5  | 135415781 | rs34577747  |             |              | chr5:135416  |
| cg14476334 | chr1  | 1100557   | rs79776491  |             |              | chr1:109804  |
| cg26708559 | chr7  | 130131730 | NA          | MEST;MEST;I | TSS1500;5'U  | chr7:130130  |
| cg23200020 | chr19 | 35068555  | NA          | LOC643719   | Body         | chr19:35068  |
| cg06128195 | chr6  | 166400879 | NA          | C6orf176;C6 | Body;Body;T  | chr6:166401  |
| cg08631427 | chr6  | 150346858 | rs144356849 | RAET1L      | TSS200       |              |
| cg15084543 | chr1  | 79472408  | NA          | ELTD1;ELTD1 | 5'UTR;1stExo | chr1:794722  |
| cg03662049 | chr2  | 164204829 | NA          |             |              | chr2:164204  |
| cg21064451 | chr22 | 38071534  | rs929039    | LGALS1      | TSS200       | chr22:38073  |
| cg19673462 | chr6  | 35109353  | NA          | TCP11;TCP11 | TSS200;TSS2  | (chr6:351088 |
| cg03979582 | chr1  | 46769114  | NA          | LRRC41;UQC  | TSS200;TSS1  | chr1:467674  |
| cg12375722 | chr5  | 140729719 | NA          | PCDHGA2;PC  | Body;TSS200  | chr5:140731  |
| cg06173536 | chr1  | 235814462 | rs10159416  | GNG4;GNG4;  | TSS1500;TSS  | chr1:235814  |
| cg16912957 | chr6  | 30124214  | NA          | TRIM10;TRIN | Body;Body    |              |
| cg02169857 | chr2  | 110969641 | NA          | NCRNA0011   | Body         | chr2:110969  |
| cg06446163 | chr20 | 42142671  | NA          | L3MBTL;L3M  | TSS1500;TSS  | chr20:42143  |
| cg02156769 | chr9  | 139872246 | NA          | PTGDS       | Body         | chr9:139872  |
| cg01923099 | chr11 | 2889875   | NA          | KCNQ1DN     | TSS1500      | chr11:28903  |
| cg17557357 | chr5  | 140729608 | NA          | PCDHGA2;PC  | Body;Body;B  | chr5:140731  |
| cg04410181 | chr1  | 46769230  | NA          | LRRC41;UQC  | TSS200;TSS2  | (chr1:467674 |
| cg12835524 | chr6  | 35109485  | NA          | TCP11;TCP11 | TSS1500;TSS  | chr6:351088  |
| cg14551952 | chr2  | 121107444 | NA          | INHBB       | Body         | chr2:121106  |
| cg26955996 | chr19 | 48547989  | NA          | CABP5       | TSS1500      |              |
| cg19211915 | chr11 | 32452513  | rs12575247  | WT1;WT1;W   | Body;Body;B  | chr11:32452  |
| cg11032634 | chr22 | 19929254  | NA          | TXNRD2;CON  | 1stExon;TSS2 | chr22:19929  |
| cg15388309 | chr20 | 42142559  | NA          | L3MBTL;L3M  | TSS1500;TSS  | chr20:42143  |
| cg03108330 | chr19 | 2900762   | rs12981594  | ZNF57       | TSS200       | chr19:29003  |
| cg01264106 | chr22 | 38071602  | NA          | LGALS1      | TSS200       | chr22:38073  |
| cg16587174 | chr6  | 31778842  | NA          | HSPA1L      | Body         | chr6:317744  |
| cg24298421 | chr1  | 10856943  | NA          | CASZ1;CASZ1 | TSS1500;TSS  | chr1:108538  |
| cg11748904 | chr20 | 35422334  | rs35565287  | C20orf117;C | Body;Body    | chr20:35422  |
| cg16627358 | chr16 | 88540175  | rs35471681  | ZFPM1       | Body         | chr16:88539  |
| cg07439128 | chr11 | 2890019   | NA          | KCNQ1DN     | TSS1500      | chr11:28903  |
| cg13641903 | chr11 | 32452608  | NA          | WT1;WT1;W   | Body;Body;B  | chr11:32452  |

|            |       |           |             |                          |              |
|------------|-------|-----------|-------------|--------------------------|--------------|
| cg13917504 | chr7  | 130131258 | NA          | MEST;MEST; TSS1500;5'U   | chr7:130130  |
| cg21873885 | chr6  | 33267214  | NA          | RGL2;RGL2 TSS200;TSS2    | (chr6:332663 |
| cg23657718 | chr4  | 1495933   | NA          |                          | chr4:149454  |
| cg20818778 | chr1  | 235814145 | rs115162768 | GNG4;GNG4;TSS1500;TSS    | chr1:235814  |
| cg15225267 | chr6  | 31276187  | rs75036475  |                          | chr6:312762  |
| cg12886694 | chr6  | 27832992  | NA          | HIST1H2AL TSS200         | chr6:278331  |
| cg17279912 | chr13 | 111267790 | rs74971770  | CARKD TSS1500            | chr13:11126  |
| cg02381009 | chr5  | 1241958   | rs10043584  | SLC6A18 Body             | chr5:124244  |
| cg20916175 | chr6  | 27832956  | NA          | HIST1H2AL TSS200         | chr6:278331  |
| cg17944110 | chr1  | 10856657  | NA          | CASZ1;CASZ11stExon;5'UT  | chr1:108538  |
| cg19548470 | chr18 | 3880510   | NA          | DLGAP1 TSS1500           | chr18:38792  |
| cg01579841 | chr6  | 166400494 | NA          | C6orf176;C6 Body;Body;T  | chr6:166401  |
| cg10623826 | chr6  | 31778639  | NA          | HSPA1L Body              | chr6:317744  |
| cg23762359 | chr11 | 2890082   | NA          | KCNQ1DN TSS1500          | chr11:28903  |
| cg07438617 | chr17 | 46655289  | NA          | HOXB4 1stExon            | chr17:46655  |
| cg13617204 | chr6  | 27832869  | NA          | HIST1H2AL TSS1500        | chr6:278331  |
| cg10503232 | chr11 | 2891495   | NA          | KCNQ1DN Body             | chr11:28903  |
| cg12175949 | chr22 | 19929286  | NA          | TXNRD2;COM 1stExon;1stE  | chr22:19929  |
| cg10648573 | chr6  | 29648348  | rs2747429   |                          |              |
| cg12167167 | chr6  | 166401051 | NA          | LOC441177;C Body;Body;B  | chr6:166401  |
| cg10052908 | chr6  | 74063522  | NA          | DPPA5 Body               | chr6:740635  |
| cg07019740 | chr22 | 19929205  | NA          | TXNRD2;COM Body;TSS200   | chr22:19929  |
| cg16489689 | chr6  | 30954150  | NA          | MUC21 Body               |              |
| cg20226154 | chr6  | 150346787 | rs1544123   | RAET1L TSS200            |              |
| cg23483495 | chr4  | 155702533 | NA          | RBM46;RBM 1stExon;5'UT   | chr4:155702  |
| cg25108566 | chr6  | 27775657  | rs200485    | HIST1H2A ;H TSS1500;1stE | chr6:277753  |
| cg05527785 | chr17 | 46656543  | NA          | HOXB4 TSS1500            | chr17:46655  |
| cg14865393 | chr1  | 10855806  | NA          | CASZ1;CASZ15'UTR;5'UTR   | chr1:108538  |
| cg01444206 | chr6  | 33266391  | NA          | RGL2;RGL2 5'UTR;Body     | chr6:332663  |
| cg00787856 | chr1  | 10857110  | NA          | CASZ1;CASZ1 TSS1500;TSS  | chr1:108538  |
| cg06318837 | chr4  | 155702341 | NA          | RBM46 TSS200             | chr4:155702  |
| cg14458834 | chr17 | 46655394  | NA          | HOXB4 1stExon            | chr17:46655  |
| cg06590608 | chr3  | 37035228  | NA          | MLH1;MLH1;TSS200;Body    | chr3:370342  |
| cg17750919 | chr1  | 79472917  | NA          | ELTD1 TSS1500            | chr1:794722  |
| cg09234616 | chr11 | 32452592  | NA          | WT1;WT1;W Body;Body;B    | chr11:32452  |
| cg18934496 | chr6  | 27792502  | NA          |                          | chr6:277917  |
| cg12949769 | chr5  | 1241224   | NA          | SLC6A18 Body             | chr5:124244  |
| cg16823958 | chr7  | 130131869 | NA          | MEST;MEST; 5'UTR;TSS20   | (chr7:130130 |
| cg03939485 | chr6  | 33266076  | NA          | RGL2;RGL2 Body;Body      | chr6:332663  |
| cg00686083 | chr6  | 33421476  | NA          | ZBTB9 TSS1500            | chr6:334220  |
| cg16083838 | chr11 | 2889809   | NA          | KCNQ1DN TSS1500          | chr11:28903  |
| cg08187750 | chr12 | 130824529 | rs4759453   | PIWIL1 5'UTR             | chr12:13082  |
| cg01693350 | chr11 | 32452187  | NA          | WT1;WT1;W Body;Body;B    | chr11:32452  |
| cg18911945 | chr20 | 42142784  | NA          | L3MBTL;L3M TSS1500;TSS   | chr20:42143  |
| cg10784143 | chr6  | 30123868  | rs115397923 | TRIM10;TRIN Body;Body    |              |

|            |       |           |            |             |                 |                |
|------------|-------|-----------|------------|-------------|-----------------|----------------|
| cg00783905 | chr6  | 31763174  | NA         | VAR5        | 5'UTR           | chr6:317632    |
| cg21161927 | chr5  | 140729653 | NA         | PCDHGA2;PC  | Body;TSS200     | chr5:140731    |
| cg13789775 | chr17 | 46655724  | NA         | HOXB4;HOXE  | 1stExon;5'UT    | chr17:46654    |
| cg05656180 | chr11 | 2890258   | NA         | KCNQ1DN     | TSS1500         | chr11:28903    |
| cg01877937 | chr20 | 42142847  | rs2072978  | L3MBTL;L3M  | TSS1500;TSS     | chr20:42143    |
| cg02177317 | chr20 | 42142699  | NA         | L3MBTL;L3M  | TSS1500;TSS     | chr20:42143    |
| cg06140764 | chr6  | 30539234  | NA         | ABCF1;ABCF  | 15'UTR;5'UTR    | chr6:305389    |
| cg08282428 | chr4  | 155702411 | NA         | RBM46       | TSS200          | chr4:155702    |
| cg16500454 | chr10 | 105127701 | NA         | TAF5        | TSS200          | chr10:10512    |
| cg09174690 | chr2  | 121107018 | NA         | INHBB       | Body            | chr2:121106    |
| cg08267489 | chr6  | 166400656 | NA         | C6orf176;C6 | Body;Body;T     | chr6:166401    |
| cg25202636 | chr3  | 37035158  | NA         | MLH1;MLH1   | ;TSS200;Body    | chr3:370342    |
| cg08570243 | chr2  | 110969853 | NA         | NCRNA0011   | Body            | chr2:110969    |
| cg24343973 | chr20 | 42142236  | NA         | L3MBTL;L3M  | TSS1500;TSS     | chr20:42143    |
| cg13200628 | chr6  | 30852069  | NA         | DDR1;DDR1   | TSS1500;5'U     | chr6:308521    |
| cg26577169 | chr6  | 166401612 | NA         | LOC441177   | ;C Body;TSS200  | chr6:166401    |
| cg26138144 | chr22 | 38071188  | NA         | LGALS1      | TSS1500         | chr22:38073    |
| cg01785628 | chr6  | 27775888  | NA         | HIST1H2AI   | ;H TSS200;TSS2  | chr6:277753    |
| cg23081604 | chr12 | 130824224 | NA         | PIWIL1      | 5'UTR           | chr12:13082    |
| cg27508821 | chr14 | 95786042  | NA         | CLMN        | Body            | chr14:95785    |
| cg08313040 | chr6  | 33092243  | NA         | HLA-DPB2    | Body            |                |
| cg12495593 | chr6  | 30539072  | NA         | ABCF1;ABCF  | 1TSS200;TSS2    | chr6:305389    |
| cg11854860 | chr4  | 6384165   | NA         | PPP2R2C;PPF | Body;TSS150     | chr4:638023    |
| cg13014333 | chr6  | 31762776  | NA         | VAR5        | Body            | chr6:317632    |
| cg09384137 | chr19 | 2900881   | rs10420989 | ZNF57       | TSS200          | chr19:29003    |
| cg09541468 | chr11 | 67211245  | NA         | CORO1B;COF  | TSS1500;1stExon | ;5'UTR         |
| cg15784913 | chr19 | 2900708   | NA         | ZNF57       | TSS200          | chr19:29003    |
| cg13846866 | chr3  | 37035399  | NA         | MLH1;MLH1   | ;5'UTR;Body     | ;5'chr3:370342 |
| cg16141690 | chr14 | 23563715  | NA         | C14orf119   | ;A TSS1500;Bod  | chr14:23563    |
| cg07599133 | chr19 | 35068628  | NA         | LOC643719   | TSS200          | chr19:35068    |
| cg26097210 | chr10 | 70092729  | NA         | PBLD;HNRNP  | TSS200;5'UT     | chr10:70091    |
| cg27151174 | chr16 | 30367227  | NA         | CD2BP2;CD2  | TSS1500;TSS     | chr16:30366    |
| cg05123447 | chr6  | 30955992  | NA         | MUC21       | 3'UTR           |                |
| cg11902539 | chr5  | 1241183   | NA         | SLC6A18     | Body            | chr5:124244    |
| cg18122606 | chr6  | 31779728  | NA         | HSPA1L      | Body            | chr6:317828    |
| cg11930197 | chr1  | 232651427 | NA         | SIPA1L2     | TSS200          |                |
| cg09149149 | chr6  | 166401618 | NA         | LOC441177   | ;C Body;TSS200  | chr6:166401    |
| cg02228804 | chr6  | 27775720  | rs200485   | HIST1H2AI   | ;H TSS1500;TSS  | chr6:277753    |
| cg12686847 | chr6  | 31779716  | NA         | HSPA1L      | Body            | chr6:317828    |
| cg15284129 | chr12 | 1928689   | NA         | LRTM2;LRTM  | TSS1500;TSS1500 | ;TSS1500       |
| cg26183708 | chr6  | 30955425  | NA         | MUC21       | Body            |                |
| cg26884376 | chr6  | 30539453  | rs3132612  | ABCF1;ABCF  | 1Body;Body      | chr6:305389    |
| cg02989768 | chr6  | 33266413  | NA         | RGL2;RGL2   | 5'UTR;Body      | chr6:332663    |
| cg20091959 | chr20 | 42142451  | NA         | L3MBTL;L3M  | TSS1500;TSS     | chr20:42143    |
| cg03374922 | chr13 | 111267935 | NA         | CARKD       | TSS200          | chr13:11126    |

|            |       |           |             |             |                |               |
|------------|-------|-----------|-------------|-------------|----------------|---------------|
| cg04898719 | chr1  | 52456918  | NA          | RAB3B       | TSS1500        | chr1:524559:  |
| cg21546671 | chr17 | 46655387  | NA          | HOXB4       | 1stExon        | chr17:46655:  |
| cg09777095 | chr6  | 31779308  | rs34372373  | HSPA1L      | Body           | chr6:317828:  |
| cg12835342 | chr11 | 67211379  | NA          | CORO1B;COF  | TSS200;TSS1500 |               |
| cg26346875 | chr6  | 31762719  | NA          | VARS        | Body           | chr6:317632:  |
| cg12169512 | chr17 | 36831178  | rs114805607 | C17orf96;C1 | 5'UTR;1stExo   | chr17:36829:  |
| cg18366150 | chr10 | 70092816  | NA          | PBLD;HNRNP  | TSS200;5'UTR   | chr10:70091:  |
| cg16448399 | chr18 | 3880076   | NA          | DLGAP1;DLG  | 1stExon;5'UT   | chr18:38792:  |
| cg03020891 | chr6  | 30538179  | rs9501023   | ABCF1;ABCF1 | TSS1500;TSS    | chr6:305389:  |
| cg26152485 | chr19 | 19281474  | NA          | LOC729991-1 | Body;5'UTR;1   | chr19:19280:  |
| cg03371609 | chr8  | 52322171  | NA          | PXDNL       | Body           | chr8:523211:  |
| cg15118665 | chr8  | 144451924 | NA          | RHPN1;C8orf | Body;TSS150    | chr8:144450:  |
| cg03078400 | chr6  | 31762644  | NA          | VARS        | Body           | chr6:317632:  |
| cg22230640 | chr6  | 32805807  | NA          | TAP2;TAP2   | Body;Body      | chr6:328062:  |
| cg26693760 | chr6  | 33267069  | NA          | RGL2;RGL2;R | 5'UTR;Body;1   | chr6:332663:  |
| cg23231670 | chr6  | 150346800 | NA          | RAET1L      | TSS200         |               |
| cg16489447 | chr11 | 67211128  | NA          | CORO1B;COF  | TSS200;5'UTR   |               |
| cg09068086 | chr2  | 110970204 | NA          | NCRNA0011f  | Body           | chr2:110969:  |
| cg10661629 | chr19 | 2900748   | rs12981594  | ZNF57       | TSS200         | chr19:29003:  |
| cg06717492 | chr7  | 65447339  | NA          | GUSB        | TSS200         | chr7:654467:  |
| cg05906740 | chr3  | 37035205  | NA          | MLH1;MLH1;  | TSS200;Body    | chr3:370342:  |
| cg23658326 | chr3  | 37034787  | NA          | EPM2AIP1;M  | 5'UTR;TSS15    | (chr3:370342: |
| cg10640731 | chr10 | 70092995  | NA          | PBLD;PBLD;H | TSS1500;TSS    | chr10:70091:  |
| cg24305381 | chr1  | 46769030  | NA          | LRRC41;LRRC | 1stExon;5'UT   | chr1:467674:  |
| cg01449677 | chr17 | 76794888  | NA          | USP36       | Body           | chr17:76798:  |
| cg25843346 | chr6  | 31762555  | NA          | VARS        | Body           | chr6:317632:  |
| cg03058556 | chr6  | 33421509  | rs2772386   | ZBTB9       | TSS1500        | chr6:334220:  |
| cg05802514 | chr4  | 1496822   | rs73061861  |             |                | chr4:149454:  |
| cg26422458 | chr1  | 79472452  | NA          | ELTD1;ELTD  | 15'UTR;1stExo  | chr1:794722:  |
| cg14345497 | chr17 | 46655603  | NA          | HOXB4       | 1stExon        | chr17:46655:  |
| cg14363992 | chr6  | 27776350  | NA          | HIST1H2AI;H | 1stExon;TSS1   | chr6:277778:  |
| cg02154252 | chr1  | 79472532  | rs115510932 | ELTD1       | TSS200         | chr1:794722:  |
| cg10360552 | chr20 | 42142766  | NA          | L3MBTL;L3M  | TSS1500;TSS    | chr20:42143:  |
| cg00122254 | chr1  | 46769320  | NA          | LRRC41;UQC  | TSS1500;TSS    | chr1:467674:  |
| cg02041435 | chr13 | 111268673 | rs330550    | CARKD       | Body           | chr13:11126:  |
| cg10996201 | chr6  | 33267358  | NA          | RGL2;RGL2   | TSS200;TSS2    | (chr6:332663: |
| cg21300993 | chr2  | 237123218 | NA          | ASB18       | Body           | chr2:237123:  |
| cg27223805 | chr11 | 2889616   | NA          |             |                | chr11:28903:  |
| cg10253022 | chr22 | 19929467  | NA          | TXNRD2;CON  | TSS200;5'UTR   | chr22:19929:  |
| cg08464208 | chr6  | 27792307  | NA          |             |                | chr6:277917:  |
| cg01830271 | chr6  | 31275148  | rs74568989  |             |                | chr6:312762:  |
| cg23609811 | chr6  | 27100717  | NA          | HIST1H2BJ;H | TSS200;TSS2    | (chr6:271001: |
| cg25140501 | chr14 | 23564641  | NA          | ACIN1;ACIN  | 15'UTR;5'UTR;  | chr14:23563:  |
| cg04285443 | chr6  | 27774969  | NA          | HIST1H2AI   | TSS1500        | chr6:277753:  |
| cg07064226 | chr3  | 37034997  | NA          | MLH1;MLH1;  | TSS1500;TSS    | chr3:370342:  |



|            |       |           |            |             |               |              |
|------------|-------|-----------|------------|-------------|---------------|--------------|
| cg10366439 | chr2  | 110970249 | NA         | NCRNA00116  | Body          | chr2:1109698 |
| cg19520201 | chr4  | 53588360  | NA         |             |               | chr4:5358818 |
| cg23870148 | chr6  | 31763282  | NA         | VARS        | 5'UTR         | chr6:3176324 |
| cg05861708 | chr6  | 166400871 | NA         | C6orf176;C6 | Body;Body;T   | chr6:1664011 |
| cg08369943 | chr20 | 42142005  | rs6017097  | L3MBTL;L3M  | TSS1500;TSS   | chr20:42143  |
| cg03632172 | chr16 | 30366690  | NA         | CD2BP2;CD2  | TSS1500;TSS   | chr16:30366  |
| cg14608180 | chr9  | 139872839 | NA         | PTGDS       | Body          | chr9:139872  |
| cg00292662 | chr22 | 38071168  | NA         | LGALS1      | TSS1500       | chr22:38073  |
| cg22694153 | chr1  | 46768912  | NA         | LRRC41;UQC  | 1stExon;TSS1  | chr1:467674  |
| cg07657521 | chr6  | 30539059  | NA         | ABCF1;ABCF  | TSS200;TSS2   | chr6:305389  |
| cg24213773 | chr6  | 30419201  | NA         |             |               | chr6:304188  |
| cg24687529 | chr1  | 117529954 | rs55948695 | PTGFRN      | 3'UTR         |              |
| cg26146308 | chr6  | 30851884  | rs7757648  | DDR1;DDR1   | TSS1500;1stE  | chr6:308521  |
| cg23626798 | chr20 | 42142494  | NA         | L3MBTL;L3M  | TSS1500;TSS   | chr20:42143  |
| cg09194159 | chr17 | 46655588  | NA         | HOXB4       | 1stExon       | chr17:46655  |
| cg24623244 | chr6  | 35109398  | NA         | TCP11;TCP1  | TSS1500;TSS   | chr6:351088  |
| cg04199621 | chr6  | 30955712  | rs45486491 | MUC21       | Body          |              |
| cg15400532 | chr6  | 27101279  | NA         | HIST1H2AG   | 3'UTR;1stExo  | chr6:271001  |
| cg03497419 | chr3  | 37034654  | NA         | EPM2AIP1;M  | 5'UTR;TSS15   | chr3:370342  |
| cg06893977 | chr6  | 30851928  | rs1264326  | DDR1;DDR1   | TSS1500;5'U   | chr6:308521  |
| cg21182196 | chr14 | 95786801  | NA         | CLMN        | TSS1500       | chr14:95785  |
| cg25977492 | chr6  | 29365261  | NA         | OR12D2      | 1stExon       |              |
| cg03500771 | chr6  | 30955950  | rs2517416  | MUC21       | Body          |              |
| cg19811425 | chr6  | 31778701  | NA         | HSPA1L      | Body          | chr6:317744  |
| cg00349723 | chr17 | 36831276  | rs34455076 | C17orf96    | TSS200        | chr17:36829  |
| cg12806763 | chr17 | 46655836  | NA         | HOXB4       | TSS200        | chr17:46654  |
| cg02532030 | chr6  | 33092494  | rs3130227  | HLA-DPB2    | Body          |              |
| cg00222995 | chr6  | 33421704  | rs2274731  | ZBTB9       | TSS1500       | chr6:334220  |
| cg27586588 | chr3  | 37034661  | NA         | EPM2AIP1;M  | 5'UTR;TSS15   | chr3:370342  |
| cg10046620 | chr6  | 27775042  | NA         | HIST1H2AI   | TSS1500       | chr6:277753  |
| cg24750920 | chr6  | 33267354  | NA         | RGL2;RGL2   | TSS200;TSS2   | chr6:332663  |
| cg05742354 | chr1  | 10856609  | NA         | CASZ1;CASZ  | 15'UTR;5'UTR  | chr1:108538  |
| cg12644888 | chr6  | 29648360  | rs365052   |             |               |              |
| cg05396178 | chr6  | 27833129  | NA         | HIST1H2AL;H | 1stExon;5'UT  | chr6:278331  |
| cg14026561 | chr6  | 166401464 | NA         | LOC441177   | C Body;Body;B | chr6:166401  |
| cg05354971 | chr2  | 91936984  | NA         |             |               | chr2:919368  |
| cg03250220 | chr2  | 110970097 | NA         | NCRNA00116  | Body          | chr2:1109698 |
| cg24899205 | chr22 | 19929184  | NA         | TXNRD2;COM  | Body;TSS200   | chr22:19929  |
| cg15038123 | chr4  | 53588397  | NA         |             |               | chr4:5358818 |
| cg00245789 | chr10 | 105128183 | NA         | TAF5        | 1stExon       | chr10:10512  |
| cg02506501 | chr1  | 1228990   | NA         | ACAP3       | Body          | chr1:122878  |
| cg02990567 | chr6  | 33266961  | NA         | RGL2;RGL2   | R 5'UTR;Body  | chr6:332663  |
| cg19402991 | chr2  | 164204915 | NA         |             |               | chr2:164204  |
| cg18938469 | chr14 | 23564120  | NA         | C14orf119   | A TSS1500;Bod | chr14:23563  |
| cg00883712 | chr16 | 30366293  | NA         | CD2BP2;CD2  | 15'UTR;TSS20  | chr16:30366  |

|            |       |           |             |                            |               |
|------------|-------|-----------|-------------|----------------------------|---------------|
| cg01712686 | chr1  | 235814419 | NA          | GNG4;GNG4;TSS1500;TSS      | chr1:235814:  |
| cg10706100 | chr6  | 166401536 | rs697475    | LOC441177;C Body;TSS200    | chr6:166401:  |
| cg22496683 | chr4  | 155702610 | NA          | RBM46 5'UTR                | chr4:155702:  |
| cg01505176 | chr6  | 31763310  | NA          | VARS 5'UTR                 | chr6:317632:  |
| cg06961071 | chr1  | 46769300  | NA          | LRRC41;UQC TSS1500;TSS     | chr1:467674:  |
| cg21330970 | chr6  | 27100702  | NA          | HIST1H2BJ;H TSS200;TSS2    | (chr6:271001: |
| cg05116896 | chr16 | 30366237  | NA          | CD2BP2;CD2 5'UTR;Body      | chr16:30366:  |
| cg19981839 | chr16 | 30366847  | NA          | CD2BP2;CD2 TSS1500;TSS     | chr16:30366:  |
| cg08628167 | chr7  | 65447138  | rs2279903   | GUSB 1stExon               | chr7:654467:  |
| cg03579738 | chr19 | 2900714   | NA          | ZNF57 TSS200               | chr19:29003:  |
| cg11418013 | chr6  | 31763277  | NA          | VARS 5'UTR                 | chr6:317632:  |
| cg06118626 | chr6  | 33267078  | rs2282850   | RGL2;RGL2;R 5'UTR;Body;    | 1chr6:332663  |
| cg01715949 | chr17 | 36831197  | rs189510768 | C17orf96 TSS200            | chr17:36829   |
| cg03383695 | chr1  | 232651092 | NA          | SIPA1L2;SIPA 1stExon;5'UTR |               |
| cg27421308 | chr10 | 70092824  | NA          | PBLD;HNRNP TSS200;5'UTR    | chr10:70091   |
| cg25592513 | chr5  | 140729614 | NA          | PCDHGA2;PC Body;Body;B     | chr5:140731:  |
| cg05385119 | chr6  | 30539063  | NA          | ABCF1;ABCF1 TSS200;TSS2    | (chr6:305389: |
| cg01071811 | chr20 | 42143080  | NA          | L3MBTL;L3M 5'UTR;1stExo    | chr20:42143:  |
| cg12280168 | chr19 | 2900884   | rs10420989  | ZNF57 TSS200               | chr19:29003:  |
| cg11439192 | chr6  | 32806182  | NA          | TAP2;TAP2 5'UTR;5'UTR      | chr6:328062:  |
| cg11434705 | chr19 | 1851995   | NA          |                            | chr19:18515:  |
| cg03804148 | chr17 | 1465813   | rs142675143 | PITPNA Body                | chr17:14651:  |
| cg15810744 | chr11 | 67211300  | NA          | CORO1B;COF TSS200;TSS1500  |               |
| cg04804565 | chr6  | 31778779  | NA          | HSPA1L Body                | chr6:317744:  |
| cg24358465 | chr6  | 27100860  | NA          | HIST1H2AG;  1stExon;TSS1   | chr6:271001:  |
| cg23795623 | chr13 | 111268031 | NA          | CARKD 1stExon              | chr13:11126:  |
| cg24454695 | chr1  | 235814326 | NA          | GNG4;GNG4;TSS1500;TSS      | chr1:235814:  |
| cg25702652 | chr2  | 164204628 | NA          |                            | chr2:164204:  |
| cg08870433 | chr19 | 2900646   | NA          | ZNF57 TSS1500              | chr19:29003:  |
| cg01800816 | chr16 | 30366694  | NA          | CD2BP2;CD2 TSS1500;TSS     | chr16:30366:  |
| cg21460081 | chr17 | 46656012  | NA          | HOXB4 TSS1500              | chr17:46654   |
| cg23911396 | chr17 | 36831425  | NA          | C17orf96 TSS1500           | chr17:36829   |
| cg02341571 | chr15 | 44968935  | NA          | PATL2 5'UTR                |               |
| cg11224603 | chr3  | 37035282  | NA          | MLH1;MLH1;1stExon;5'UT     | chr3:370342:  |
| cg04264018 | chr6  | 27100671  | NA          | HIST1H2BJ;H TSS200;TSS2    | (chr6:271001: |
| cg01360325 | chr10 | 105127811 | NA          | TAF5 1stExon               | chr10:10512:  |
| cg08334962 | chr17 | 36831188  | NA          | C17orf96 TSS200            | chr17:36829   |
| cg26978691 | chr10 | 105128013 | NA          | TAF5 1stExon               | chr10:10512:  |
| cg24114154 | chr17 | 46655829  | NA          | HOXB4 TSS200               | chr17:46654   |
| cg12252297 | chr6  | 27833555  | NA          | HIST1H2AL;H 3'UTR;1stExo   | chr6:278351:  |
| cg17753711 | chr6  | 30539066  | NA          | ABCF1;ABCF1 TSS200;TSS2    | (chr6:305389: |
| cg11668794 | chr6  | 32805877  | NA          | TAP2;TAP2 Body;Body        | chr6:328062:  |
| cg08312215 | chr6  | 33266943  | NA          | RGL2;RGL2;R 5'UTR;Body;    | 1chr6:332663  |
| cg12851504 | chr3  | 37035222  | NA          | MLH1;MLH1;TSS200;Body      | chr3:370342:  |
| cg11600697 | chr3  | 37034814  | NA          | EPM2AIP1;MTSS200;TSS1      | chr3:370342:  |

|            |       |           |             |             |              |               |
|------------|-------|-----------|-------------|-------------|--------------|---------------|
| cg08769356 | chr7  | 65447249  | rs2279904   | GUSB;GUSB   | 5'UTR;1stExo | chr7:654467:  |
| cg13684918 | chr6  | 33266881  | NA          | RGL2;RGL2;R | 5'UTR;Body;1 | chr6:332663(  |
| cg23268677 | chr22 | 19929097  | NA          | TXNRD2;CON  | Body;TSS200  | chr22:19929(  |
| cg14166948 | chr1  | 1099563   | NA          |             |              | chr1:109804:  |
| cg16735021 | chr14 | 23564343  | NA          | C14orf119;A | TSS1500;1stE | chr14:23563(  |
| cg09422355 | chr19 | 48547158  | rs61748769  | CABP5       | 1stExon      |               |
| cg21368354 | chr13 | 111267856 | NA          | CARKD       | TSS200       | chr13:11126:  |
| cg25837710 | chr3  | 37035220  | NA          | MLH1;MLH1;  | TSS200;Body  | chr3:370342:  |
| cg04585389 | chr16 | 1486048   | NA          | CCDC154     | Body         | chr16:14870:  |
| cg06582202 | chr11 | 2889886   | NA          | KCNQ1DN     | TSS1500      | chr11:28903(  |
| cg04977610 | chr16 | 30366665  | NA          | CD2BP2;CD2  | TSS1500;5'U  | chr16:30366:  |
| cg23666180 | chr6  | 27100115  | rs41269245  | HIST1H2AG;f | TSS1500;3'U  | chr6:271001:  |
| cg16792604 | chr6  | 30539044  | NA          | ABCF1;ABCF1 | TSS200;TSS2  | (chr6:305389( |
| cg22093805 | chr4  | 53588374  | NA          |             |              | chr4:535881(  |
| cg16433211 | chr3  | 37034693  | NA          | EPM2AIP1;M  | 5'UTR;TSS15  | (chr3:370342: |
| cg25588093 | chr7  | 65447242  | NA          | GUSB;GUSB   | 5'UTR;1stExo | chr7:654467:  |
| cg22562040 | chr6  | 33421819  | rs41271245  | ZBTB9       | TSS1500      | chr6:334220:  |
| cg09395540 | chr6  | 31778719  | NA          | HSPA1L      | Body         | chr6:317744:  |
| cg16862791 | chr20 | 42142596  | NA          | L3MBTL;L3M  | TSS1500;TSS: | chr20:42143:  |
| cg03505443 | chr6  | 33267087  | rs2282850   | RGL2;RGL2;R | 5'UTR;Body;1 | chr6:332663(  |
| cg19435409 | chr6  | 27833121  | NA          | HIST1H2AL;H | 1stExon;5'UT | chr6:278331:  |
| cg07101782 | chr3  | 37034495  | NA          | MLH1;MLH1;  | TSS1500;TSS: | chr3:370342:  |
| cg06797938 | chr17 | 1466136   | rs147353202 | PITPNA      | TSS200       | chr17:14651:  |
| cg11402700 | chr13 | 111267793 | rs74971770  | CARKD       | TSS1500      | chr13:11126:  |
| cg26469597 | chr16 | 30366960  | NA          | CD2BP2;CD2  | TSS1500;TSS: | chr16:30366:  |
| cg01761968 | chr12 | 130824831 | rs77078301  | PIWIL1      | 5'UTR        | chr12:13082:  |
| cg01606310 | chr6  | 33266703  | NA          | RGL2;RGL2;R | 5'UTR;Body;1 | chr6:332663(  |
| cg09867046 | chr6  | 27833050  | NA          | HIST1H2AL   | TSS200       | chr6:278331:  |
| cg09081266 | chr6  | 29365287  | rs2073150   | OR12D2      | 1stExon      |               |
| cg02422694 | chr17 | 46655790  | rs143310387 | HOXB4       | TSS200       | chr17:46654(  |
| cg08474826 | chr1  | 1099630   | NA          |             |              | chr1:109804:  |
| cg12119313 | chr6  | 33266931  | NA          | RGL2;RGL2;R | 5'UTR;Body;1 | chr6:332663(  |
| cg27572120 | chr6  | 30419551  | rs9295885   |             |              | chr6:304188:  |
| cg03542248 | chr6  | 33266907  | NA          | RGL2;RGL2;R | 5'UTR;Body;1 | chr6:332663(  |
| cg13840194 | chr1  | 10856202  | NA          | CASZ1;CASZ1 | 5'UTR;5'UTR  | chr1:108538(  |
| cg21915639 | chr1  | 46769308  | NA          | LRRC41;UQC  | TSS1500;TSS: | chr1:467674:  |
| cg09601882 | chr6  | 28834502  | NA          |             |              | chr6:288316(  |
| cg15156844 | chr18 | 3880020   | NA          | DLGAP1      | 1stExon      | chr18:38792(  |
| cg09301114 | chr6  | 33266964  | rs73410003  | RGL2;RGL2;R | 5'UTR;Body;1 | chr6:332663(  |
| cg17070338 | chr13 | 111268441 | NA          | CARKD       | Body         | chr13:11126:  |
| cg08984686 | chr6  | 33267143  | NA          | RGL2;RGL2;R | 5'UTR;Body;1 | chr6:332663(  |
| cg00002406 | chr16 | 30366435  | NA          | CD2BP2;CD2  | 5'UTR;TSS20  | (chr16:30366: |
| cg11337053 | chr1  | 232651485 | NA          | SIPA1L2     | TSS1500      |               |
| cg15565065 | chr17 | 46655476  | NA          | HOXB4       | 1stExon      | chr17:46655:  |
| cg04979706 | chr6  | 33421902  | NA          | ZBTB9       | TSS1500      | chr6:334220:  |

|            |       |           |             |                     |                |               |
|------------|-------|-----------|-------------|---------------------|----------------|---------------|
| cg26585845 | chr17 | 36831195  | rs189510768 | C17orf96            | TSS200         | chr17:36829   |
| cg00867446 | chr14 | 23564668  | NA          | ACIN1;ACIN1         | 5'UTR;5'UTR;   | chr14:23563   |
| cg11247116 | chr6  | 31763377  | NA          | VARS;VARS           | 1stExon;5'UT   | chr6:317632   |
| cg08410921 | chr6  | 27100831  | NA          | HIST1H2AG;f         | 1stExon;5'UT   | chr6:271001   |
| cg07059148 | chr17 | 36831255  | rs34455076  | C17orf96            | TSS200         | chr17:36829   |
| cg06424719 | chr10 | 70093223  | NA          | PBLD;PBLD;HTSS1500; | TSS:           | chr10:70091   |
| cg09739036 | chr11 | 67211315  | NA          | CORO1B;COF          | TSS200;TSS1500 |               |
| cg14853467 | chr6  | 33422102  | NA          | ZBTB9               | TSS1500        | chr6:334220   |
| cg11796507 | chr6  | 27833095  | NA          | HIST1H2AL           | TSS200         | chr6:278331   |
| cg01614643 | chr6  | 30124769  | NA          | TRIM10;TRIM         | Body;Body      |               |
| cg02779707 | chr6  | 32806196  | NA          | TAP2;TAP2           | 5'UTR;5'UTR    | chr6:328062   |
| cg23657870 | chr6  | 30539005  | NA          | ABCF1;ABCF1         | TSS200;TSS2    | (chr6:305389  |
| cg21600850 | chr6  | 166401598 | NA          | LOC441177;C         | Body;TSS200    | chr6:166401   |
| cg16279775 | chr7  | 65447418  | NA          | GUSB                | TSS200         | chr7:654467   |
| cg04984575 | chr20 | 42142673  | NA          | L3MBTL;L3M          | TSS1500;TSS:   | chr20:42143   |
| cg24663490 | chr6  | 27832932  | NA          | HIST1H2AL           | TSS200         | chr6:278331   |
| cg25803423 | chr14 | 23563820  | NA          | C14orf119;A         | TSS1500;Bod    | chr14:23563   |
| cg06414921 | chr6  | 31276504  | rs28367688  |                     |                | chr6:312762   |
| cg04958658 | chr20 | 35421865  | NA          | C20orf117;C         | Body;Body      | chr20:35422   |
| cg27213157 | chr6  | 33266969  | rs73410003  | RGL2;RGL2;R         | 5'UTR;Body;1   | chr6:332663   |
| cg17621259 | chr3  | 37035168  | NA          | MLH1;MLH1;          | TSS200;Body    | chr3:370342   |
| cg24836204 | chr8  | 144450966 | NA          | RHPN1;C8orf         | TSS200;TSS2    | (chr8:144450  |
| cg10156941 | chr17 | 1466296   | NA          | PITPNA              | TSS200         | chr17:14651   |
| cg07015911 | chr17 | 46655580  | NA          | HOXB4               | 1stExon        | chr17:46655   |
| cg23408670 | chr17 | 36831499  | NA          | C17orf96            | TSS1500        | chr17:36829   |
| cg18825927 | chr11 | 67211308  | NA          | CORO1B;COF          | TSS200;TSS1500 |               |
| cg02205391 | chr6  | 31762409  | NA          | VARS                | Body           | chr6:317632   |
| cg08022281 | chr6  | 29648345  | rs2747429   |                     |                |               |
| cg07265873 | chr6  | 30851940  | rs7757648   | DDR1;DDR1           | TSS1500;5'U    | chr6:308521   |
| cg10592690 | chr1  | 46769564  | NA          | LRRC41;UQC          | TSS1500;Bod    | chr1:467674   |
| cg16988810 | chr6  | 31762650  | NA          | VARS                | Body           | chr6:317632   |
| cg12090052 | chr6  | 35109435  | NA          | TCP11;TCP11         | TSS1500;TSS:   | chr6:351088   |
| cg01870456 | chr13 | 111267991 | NA          | CARKD               | TSS200         | chr13:11126   |
| cg14671526 | chr3  | 37035200  | NA          | MLH1;MLH1;          | TSS200;Body    | chr3:370342   |
| cg18833958 | chr6  | 33421468  | NA          | ZBTB9               | TSS1500        | chr6:334220   |
| cg04876474 | chr11 | 2890091   | NA          | KCNQ1DN             | TSS1500        | chr11:28903   |
| cg08089301 | chr17 | 46655561  | NA          | HOXB4               | 1stExon        | chr17:46655   |
| cg19326232 | chr6  | 33422095  | NA          | ZBTB9               | TSS1500        | chr6:334220   |
| cg19081437 | chr17 | 46655796  | rs143310387 | HOXB4               | TSS200         | chr17:46654   |
| cg00465975 | chr22 | 19929557  | rs3788319   | TXNRD2;COM          | TSS200;5'UT    | f chr22:19929 |
| cg02611812 | chr6  | 30955412  | NA          | MUC21               | Body           |               |
| cg06108510 | chr3  | 37035063  | NA          | MLH1;MLH1;          | TSS1500;TSS:   | chr3:370342   |
| cg23001000 | chr6  | 30852307  | NA          | DDR1;DDR1           | TSS200;5'UT    | f chr6:308521 |
| cg12670305 | chr6  | 31762630  | NA          | VARS                | Body           | chr6:317632   |
| cg17184952 | chr6  | 31763373  | NA          | VARS;VARS           | 1stExon;5'UT   | chr6:317632   |

|            |       |           |             |                                        |                    |                 |
|------------|-------|-----------|-------------|----------------------------------------|--------------------|-----------------|
| cg02465374 | chr6  | 166401700 | NA          | LOC441177;C                            | Body;TSS200        | chr6:166401700  |
| cg20185617 | chr1  | 1099651   | NA          |                                        |                    | chr1:1098043    |
| cg25713684 | chr10 | 105127687 | NA          | TAF5                                   | TSS200             | chr10:105127687 |
| cg08167286 | chr6  | 31779529  | NA          | HSPA1L                                 | Body               | chr6:3178286    |
| cg19855366 | chr13 | 111267979 | NA          | CARKD                                  | TSS200             | chr13:111267979 |
| cg00550080 | chr6  | 30124792  | NA          | TRIM10;TRIM10                          | Body;Body          |                 |
| cg10088320 | chr6  | 32805759  | NA          | TAP2;TAP2                              | Body;Body          | chr6:3280620    |
| cg06952307 | chr17 | 47287974  | NA          | ABI3;GNGT2;5'UTR;TSS1500;5'UTR;1stExon |                    |                 |
| cg09502511 | chr6  | 30539237  | NA          | ABCF1;ABCF1                            | 5'UTR;5'UTR;       | chr6:3053898    |
| cg13792528 | chr6  | 28834507  | NA          |                                        |                    | chr6:2883168    |
| cg20050761 | chr7  | 130131923 | NA          | MEST;MEST;5'UTR;TSS200                 |                    | (chr7:1301307   |
| cg10076931 | chr6  | 27100556  | NA          | HIST1H2AG;TSS1500;5'UTR                |                    | chr6:2710017    |
| cg23036136 | chr6  | 30955979  | NA          | MUC21                                  | 3'UTR              |                 |
| cg01787834 | chr6  | 31762723  | NA          | VARS                                   | Body               | chr6:3176324    |
| cg13372743 | chr8  | 52322134  | NA          | PXDNL                                  | Body               | chr8:5232110    |
| cg18586343 | chr10 | 105127615 | rs10883857  | TAF5                                   | TSS200             | chr10:105127615 |
| cg10114372 | chr6  | 31763312  | NA          | VARS                                   | 5'UTR              | chr6:3176324    |
| cg11394653 | chr6  | 31763370  | NA          | VARS;VARS                              | 1stExon;5'UTR      | chr6:3176324    |
| cg10470808 | chr6  | 30852092  | NA          | DDR1;DDR1                              | TSS1500;5'UTR      | chr6:3085210    |
| cg14723918 | chr6  | 31763435  | NA          | VARS;VARS                              | 1stExon;5'UTR      | chr6:3176324    |
| cg18302582 | chr14 | 95786029  | NA          | CLMN                                   | Body               | chr14:9578570   |
| cg02443816 | chr2  | 97220858  | NA          |                                        |                    |                 |
| cg11667101 | chr10 | 105127581 | NA          | TAF5                                   | TSS200             | chr10:105127581 |
| cg14466680 | chr6  | 33267268  | NA          | RGL2;RGL2                              | TSS200;TSS200      | (chr6:3326630   |
| cg22118082 | chr6  | 30124647  | rs114536811 | TRIM10;TRIM10                          | Body;Body          |                 |
| cg00909847 | chr2  | 133038927 | NA          |                                        |                    |                 |
| cg21227785 | chr6  | 30539077  | NA          | ABCF1;ABCF1                            | TSS200;TSS200      | (chr6:3053898   |
| cg23051411 | chr2  | 237123571 | NA          | ASB18                                  | Body               | chr2:2371230    |
| cg13057174 | chr1  | 10857091  | NA          | CASZ1;CASZ1                            | TSS1500;TSS1500    | chr1:1085388    |
| cg25786333 | chr6  | 29364799  | rs2073152   | OR12D2                                 | 1stExon            |                 |
| cg08835221 | chr22 | 38071607  | NA          | LGALS1                                 | TSS200             | chr22:3807300   |
| cg11715943 | chr6  | 33091841  | rs9277730   | HLA-DPB2                               | Body               |                 |
| cg01530101 | chr11 | 2891098   | NA          | KCNQ1DN                                | TSS200             | chr11:2890300   |
| cg12251145 | chr6  | 30124744  | rs114536811 | TRIM10;TRIM10                          | Body;Body          |                 |
| cg27618777 | chr6  | 32804628  | NA          | TAP2;TAP2                              | Body;Body          | chr6:3280620    |
| cg18312812 | chr19 | 2900898   | rs10420989  | ZNF57;ZNF57                            | 5'UTR;1stExon      | chr19:2900300   |
| cg18274559 | chr6  | 31762685  | NA          | VARS                                   | Body               | chr6:3176324    |
| cg13973620 | chr6  | 33266652  | NA          | RGL2;RGL2;R                            | 5'UTR;Body;1stExon | chr6:3326630    |
| cg16244711 | chr1  | 232651277 | NA          | SIPA1L2                                | TSS200             |                 |
| cg06251929 | chr6  | 30539459  | rs3132612   | ABCF1;ABCF1                            | Body;Body          | chr6:3053898    |
| cg21325631 | chr6  | 31778784  | NA          | HSPA1L                                 | Body               | chr6:3177440    |
| cg08734637 | chr7  | 130131189 | rs3807138   | MESTIT1;MESTIT1                        | TSS200;TSS1500     | chr7:1301307    |
| cg14489632 | chr12 | 130824328 | NA          | PIWIL1                                 | 5'UTR              | chr12:130824328 |
| cg02537149 | chr1  | 46769035  | NA          | LRRC41;LRRC41                          | 1stExon;5'UTR      | chr1:4676740    |
| cg17810098 | chr22 | 19929066  | NA          | TXNRD2;CON                             | Body;TSS200        | chr22:19929066  |

|            |       |           |             |                                  |              |              |
|------------|-------|-----------|-------------|----------------------------------|--------------|--------------|
| cg02533422 | chr6  | 30419051  | rs11753256  |                                  |              | chr6:304188  |
| cg08026039 | chr16 | 1486384   | rs909974    | CCDC154                          | Body         | chr16:14870  |
| cg12846737 | chr6  | 31276088  | rs4544954   |                                  |              | chr6:312762  |
| cg05729731 | chr6  | 32805962  | NA          | TAP2;TAP2                        | Body;Body    | chr6:328062  |
| cg04484826 | chr6  | 31779582  | NA          | HSPA1L                           | Body         | chr6:317828  |
| cg10769891 | chr3  | 37034730  | NA          | EPM2AIP1;M5'UTR;TSS15            |              | (chr3:370342 |
| cg16317730 | chr6  | 30539486  | rs3132612   | ABCF1;ABCF1                      | Body;Body    | chr6:305389  |
| cg06860277 | chr22 | 19930072  | rs737865    | COMT;TXNR1                       | 5'UTR;TSS15  | (chr22:19929 |
| cg21073350 | chr5  | 140729813 | NA          | PCDHGA2;PC                       | Body;TSS200  | chr5:140731  |
| cg17026072 | chr1  | 1229790   | NA          | ACAP3                            | Body         | chr1:122878  |
| cg18592365 | chr1  | 79472536  | rs115510932 | ELTD1                            | TSS200       | chr1:794722  |
| cg16537676 | chr6  | 30851624  | rs74689782  | DDR1;DDR1                        | TSS1500;TSS  | chr6:308521  |
| cg00856580 | chr1  | 52456669  | NA          | RAB3B                            | TSS1500      | chr1:524559  |
| cg00599401 | chr6  | 30538989  | NA          | ABCF1;ABCF1                      | TSS200;TSS2  | (chr6:305389 |
| cg22533573 | chr11 | 32452771  | NA          | WT1;WT1;W                        | Body;Body;B  | chr11:32452  |
| cg14340074 | chr6  | 33266407  | NA          | RGL2;RGL2                        | 5'UTR;Body   | chr6:332663  |
| cg17641046 | chr3  | 37034473  | NA          | MLH1;MLH1;TSS1500;TSS            |              | chr3:370342  |
| cg02817123 | chr6  | 27775750  | NA          | HIST1H2AI;H                      | TSS1500;TSS  | chr6:277753  |
| cg12558012 | chr19 | 19281197  | rs1858846   | LOC729991-1                      | Body;5'UTR;T | chr19:19280  |
| cg26327071 | chr17 | 46655818  | NA          | HOXB4                            | TSS200       | chr17:46654  |
| cg00142150 | chr22 | 38071001  | rs4820294   | LGALS1                           | TSS1500      | chr22:38073  |
| cg07355926 | chr19 | 1852127   | rs11880925  |                                  |              | chr19:18515  |
| cg17664233 | chr6  | 33092513  | rs3129277   | HLA-DPB2                         | Body         |              |
| cg03343730 | chr1  | 46769302  | NA          | LRRC41;UQC                       | TSS1500;TSS  | chr1:467674  |
| cg12858693 | chr6  | 150346886 | NA          | RAET1L                           | TSS1500      |              |
| cg01726393 | chr19 | 19281461  | NA          | LOC729991-1                      | Body;5'UTR;T | chr19:19280  |
| cg04515200 | chr5  | 135415762 | NA          |                                  |              | chr5:135416  |
| cg14088957 | chr7  | 130131085 | NA          | MESTIT1;ME                       | TSS200;TSS1  | chr7:130130  |
| cg21771891 | chr6  | 27782126  | NA          | HIST1H2AJ;H                      | 1stExon;TSS1 | chr6:277822  |
| cg04504578 | chr17 | 36831313  | NA          | C17orf96                         | TSS200       | chr17:36829  |
| cg00940261 | chr14 | 95786011  | NA          | CLMN                             | Body         | chr14:95785  |
| cg02197677 | chr6  | 30539092  | NA          | ABCF1;ABCF1                      | TSS200;TSS2  | (chr6:305389 |
| cg25940949 | chr6  | 33267289  | NA          | RGL2;RGL2                        | TSS200;TSS2  | (chr6:332663 |
| cg27331401 | chr3  | 37035207  | NA          | MLH1;MLH1;TSS200;Body            |              | chr3:370342  |
| cg20724405 | chr6  | 32805960  | NA          | TAP2;TAP2                        | Body;Body    | chr6:328062  |
| cg12607514 | chr6  | 33422080  | NA          | ZBTB9                            | TSS1500      | chr6:334220  |
| cg05936555 | chr6  | 30539508  | NA          | ABCF1;ABCF1                      | Body;Body    | chr6:305389  |
| cg04867406 | chr11 | 67211057  | NA          | CORO1B;COF                       | TSS200;5'UTR |              |
| cg16128363 | chr18 | 3880558   | NA          | DLGAP1                           | TSS1500      | chr18:38792  |
| cg21790626 | chr19 | 58220494  | NA          | ZNF154;ZNF15                     | 5'UTR;1stExo | chr19:58220  |
| cg08119607 | chr6  | 150347053 | rs76959132  | RAET1L                           | TSS1500      |              |
| cg09892131 | chr6  | 33422028  | NA          | ZBTB9                            | TSS1500      | chr6:334220  |
| cg11195444 | chr6  | 33266070  | NA          | RGL2;RGL2                        | Body;Body    | chr6:332663  |
| cg06874426 | chr17 | 47287526  | NA          | ABI3;GNGT2;TSS200;TSS1500;TSS200 |              |              |
| cg03869874 | chr13 | 111267849 | NA          | CARKD                            | TSS200       | chr13:11126  |

|            |       |           |             |                                     |                  |
|------------|-------|-----------|-------------|-------------------------------------|------------------|
| cg20392088 | chr4  | 6384347   | NA          | PPP2R2C;PPFBody;TSS150              | chr4:638023:     |
| cg00893636 | chr3  | 37034840  | NA          | EPM2AIP1;MTSS200;TSS1               | chr3:370342:     |
| cg26465391 | chr19 | 58220773  | NA          | ZNF154 TSS200                       | chr19:58220:     |
| cg18630363 | chr6  | 30955382  | rs2844677   | MUC21 Body                          |                  |
| cg10587741 | chr22 | 38071170  | NA          | LGALS1 TSS1500                      | chr22:380730:    |
| cg27088830 | chr6  | 166401018 | NA          | C6orf176;C6orf176;Body;Body;TSS1500 | chr6:166401018:  |
| cg06241803 | chr6  | 30538984  | NA          | ABCF1;ABCF1 TSS200;TSS2             | chr6:30538984:   |
| cg19540702 | chr19 | 19281175  | NA          | LOC729991-1 Body;5'UTR;TSS1500      | chr19:19280980:  |
| cg20212336 | chr13 | 111268714 | NA          | CARKD Body                          | chr13:111268714: |
| cg17165311 | chr17 | 1466280   | rs137984928 | PITPNA TSS200                       | chr17:14651170:  |
| cg16498314 | chr16 | 30366841  | NA          | CD2BP2;CD2BP2 TSS1500;TSS1500       | chr16:30366841:  |
| cg03270204 | chr6  | 30851638  | rs73727107  | DDR1;DDR1 TSS1500;TSS1500           | chr6:30852104:   |
| cg03026929 | chr6  | 32806028  | NA          | TAP2;TAP2 5'UTR;5'UTR               | chr6:32806280:   |
| cg26598649 | chr18 | 3880086   | NA          | DLGAP1;DLGAP1 1stExon;5'UTR         | chr18:38792080:  |
| cg17250082 | chr6  | 31275875  | rs1634760   |                                     | chr6:31276200:   |
| cg26484464 | chr6  | 30537886  | NA          | ABCF1;ABCF1 TSS1500;TSS1500         | chr6:30538984:   |
| cg24446071 | chr19 | 19281270  | NA          | LOC729991-1 Body;5'UTR;TSS1500      | chr19:19280980:  |
| cg10035607 | chr16 | 30366449  | NA          | CD2BP2;CD2BP2 5'UTR;TSS200          | chr16:30366841:  |
| cg15414745 | chr6  | 74064047  | rs185614200 | DPPA5 TSS200                        | chr6:74063500:   |
| cg21490561 | chr3  | 37034825  | NA          | EPM2AIP1;MTSS200;TSS1               | chr3:370342:     |
| cg16783571 | chr6  | 74064594  | NA          | DPPA5 TSS1500                       | chr6:74063500:   |
| cg26122012 | chr8  | 144450933 | NA          | RHPN1;C8orf176 TSS200;TSS2          | chr8:144450933:  |
| cg03192963 | chr3  | 37034909  | NA          | EPM2AIP1;MTSS200;TSS1               | chr3:370342:     |
| cg11988591 | chr8  | 144451909 | NA          | RHPN1;C8orf176 Body;TSS1500         | chr8:144450933:  |
| cg25255679 | chr8  | 144450942 | NA          | RHPN1;C8orf176 TSS200;TSS2          | chr8:144450933:  |
| cg18732587 | chr10 | 105127670 | NA          | TAF5 TSS200                         | chr10:105127670: |
| cg26404748 | chr14 | 23564693  | NA          | ACIN1;ACIN1 5'UTR;5'UTR             | chr14:23563900:  |
| cg12428738 | chr6  | 33267392  | NA          | RGL2;RGL2 TSS1500;TSS1500           | chr6:33266300:   |
| cg12422930 | chr6  | 31763285  | NA          | VARS 5'UTR                          | chr6:31763285:   |
| cg18059012 | chr15 | 44969129  | NA          | PATL2 TSS200                        |                  |
| cg09998591 | chr11 | 2891402   | NA          | KCNQ1DN Body                        | chr11:28903000:  |
| cg26343883 | chr2  | 164205032 | NA          |                                     | chr2:16420400:   |
| cg17091610 | chr20 | 42142484  | NA          | L3MBTL;L3MBTL TSS1500;TSS1500       | chr20:42143000:  |
| cg24985459 | chr3  | 37035090  | NA          | MLH1;MLH1;TSS200;TSS200             | chr3:370342:     |
| cg01402735 | chr1  | 79472558  | NA          | ELTD1 TSS200                        | chr1:79472200:   |
| cg11978884 | chr5  | 135415819 | rs34577747  |                                     | chr5:135416000:  |
| cg25478600 | chr11 | 2890605   | NA          | KCNQ1DN TSS1500                     | chr11:28903000:  |
| cg20297423 | chr7  | 130131138 | NA          | MESTIT1;MESTIT1 TSS200;TSS1         | chr7:13013000:   |
| cg15174905 | chr19 | 19281255  | rs759999    | LOC729991-1 Body;5'UTR;TSS1500      | chr19:19280980:  |
| cg03239591 | chr6  | 30539540  | NA          | ABCF1;ABCF1 Body;Body               | chr6:30538984:   |
| cg14177328 | chr4  | 53588850  | NA          |                                     | chr4:53588100:   |
| cg26260794 | chr6  | 32806022  | NA          | TAP2;TAP2 5'UTR;5'UTR               | chr6:32806280:   |
| cg06771056 | chr6  | 32805223  | rs56145201  | TAP2;TAP2 Body;Body                 | chr6:32806280:   |
| cg03026524 | chr6  | 28834480  | NA          |                                     | chr6:28831600:   |
| cg22993154 | chr6  | 31276653  | rs115456947 |                                     | chr6:31276200:   |

|            |       |           |             |             |               |               |
|------------|-------|-----------|-------------|-------------|---------------|---------------|
| cg09003373 | chr7  | 130130995 | NA          | MESTIT1;ME' | Body;TSS150   | chr7:130130:  |
| cg20252111 | chr20 | 42143211  | NA          | L3MBTL;L3M  | 1stExon;1stE  | chr20:42143:  |
| cg05984845 | chr6  | 30124942  | NA          | TRIM10;TRIN | Body;Body     |               |
| cg09080913 | chr7  | 130131887 | NA          | MEST;MEST;  | 5'UTR;TSS20   | (chr7:130130: |
| cg08668790 | chr19 | 58220662  | NA          | ZNF154      | TSS200        | chr19:58220:  |
| cg04117396 | chr17 | 76795028  | NA          | USP36       | Body          | chr17:76798:  |
| cg09706029 | chr6  | 33266089  | NA          | RGL2;RGL2   | Body;Body     | chr6:332663:  |
| cg19208331 | chr3  | 37035345  | NA          | MLH1;MLH1;  | 1stExon;5'UT  | chr3:370342:  |
| cg12254291 | chr6  | 166400936 | NA          | C6orf176;C6 | Body;Body;T'  | chr6:166401'  |
| cg08090385 | chr1  | 1099583   | NA          |             |               | chr1:109804:  |
| cg07546106 | chr6  | 32806236  | NA          | TAP2;TAP2   | 5'UTR;5'UTR   | chr6:328062:  |
| cg07579404 | chr6  | 150346721 | rs1544123   | RAET1L      | TSS200        |               |
| cg20898522 | chr6  | 32806156  | rs2071544   | TAP2;TAP2   | 5'UTR;5'UTR   | chr6:328062:  |
| cg11955762 | chr13 | 111268705 | NA          | CARKD       | Body          | chr13:11126:  |
| cg16574737 | chr5  | 140730469 | NA          | PCDHGB1;PC  | 1stExon;Body  | chr5:140731:  |
| cg01921382 | chr5  | 1241848   | NA          | SLC6A18     | Body          | chr5:124244:  |
| cg23560159 | chr6  | 32805748  | NA          | TAP2;TAP2   | Body;Body     | chr6:328062:  |
| cg03947814 | chr11 | 2890419   | NA          | KCNQ1DN     | TSS1500       | chr11:28903:  |
| cg12790037 | chr3  | 37035117  | NA          | MLH1;MLH1;  | TSS200;TSS2   | (chr3:370342: |
| cg05661282 | chr19 | 58220370  | NA          | ZNF154;ZNF  | 15'UTR;1stExo | chr19:58220:  |
| cg25299750 | chr6  | 35109124  | rs78614904  | TCP11;TCP1  | 15'UTR;1stExo | chr6:351088:  |
| cg12078775 | chr6  | 30419543  | rs9295885   |             |               | chr6:304188:  |
| cg17910470 | chr17 | 76795278  | rs74001255  | USP36       | Body          | chr17:76798:  |
| cg18512930 | chr4  | 1496880   | rs62286822  |             |               | chr4:149454:  |
| cg18370200 | chr6  | 33267248  | NA          | RGL2;RGL2   | TSS200;TSS2   | (chr6:332663: |
| cg25762195 | chr8  | 144450925 | NA          | RHPN1;C8orf | TSS200;TSS2   | (chr8:144450: |
| cg04714201 | chr6  | 30538986  | NA          | ABCF1;ABCF  | 1TSS200;TSS2  | (chr6:305389: |
| cg27057652 | chr8  | 52322137  | NA          | PXDNL       | Body          | chr8:523211:  |
| cg21351768 | chr6  | 33421913  | NA          | ZBTB9       | TSS1500       | chr6:334220:  |
| cg19093782 | chr2  | 242904793 | rs114993155 |             |               |               |
| cg09027493 | chr6  | 35109548  | NA          | TCP11;TCP1  | 1TSS1500;TSS  | chr6:351088:  |
| cg22675922 | chr11 | 2889840   | NA          | KCNQ1DN     | TSS1500       | chr11:28903:  |
| cg13159388 | chr8  | 144451643 | NA          | RHPN1;C8orf | Body;TSS150   | chr8:144450:  |
| cg18052665 | chr6  | 74064140  | rs62440583  | DPPA5       | TSS200        | chr6:740635:  |
| cg26601317 | chr11 | 2890575   | NA          | KCNQ1DN     | TSS1500       | chr11:28903:  |
| cg05369791 | chr7  | 130131146 | NA          | MESTIT1;ME' | TSS200;TSS1'  | chr7:130130:  |
| cg10397774 | chr8  | 144451413 | rs62524011  | RHPN1;C8orf | Body;TSS150   | chr8:144450:  |
| cg22660147 | chr17 | 46656093  | NA          | HOXB4       | TSS1500       | chr17:46654:  |
| cg19221044 | chr6  | 32806167  | rs2071544   | TAP2;TAP2   | 5'UTR;5'UTR   | chr6:328062:  |
| cg08207377 | chr19 | 19281140  | NA          | LOC729991-  | Body;5'UTR;   | chr19:19280:  |
| cg09514717 | chr6  | 31763318  | NA          | VARS        | 5'UTR         | chr6:317632:  |
| cg17880703 | chr19 | 2900938   | NA          | ZNF57;ZNF   | 57'UTR;1stExo | chr19:29003:  |
| cg25266281 | chr2  | 242904768 | rs114993155 |             |               |               |
| cg12378817 | chr10 | 133961235 | NA          | JAKMIP3     | Body          |               |
| cg06100421 | chr7  | 130131136 | NA          | MESTIT1;ME' | TSS200;TSS1'  | chr7:130130:  |



|            |       |           |             |              |                          |              |
|------------|-------|-----------|-------------|--------------|--------------------------|--------------|
| cg27590105 | chr6  | 150346816 | NA          | RAET1L       | TSS200                   |              |
| cg14099468 | chr1  | 235814814 | NA          | GNG4;GNG4    | TSS1500;TSS1500          | chr1:2358114 |
| cg27049766 | chr19 | 58220516  | NA          | ZNF154;ZNF15 | 5'UTR;1stExon            | chr19:58220  |
| cg27338480 | chr7  | 130131885 | NA          | MEST;MEST    | 5'UTR;TSS200             | (chr7:130130 |
| cg16289417 | chr6  | 166400665 | NA          | C6orf176;C6  | Body;Body;T              | chr6:166401  |
| cg00269553 | chr8  | 52321814  | NA          | PXDNL        | Body                     | chr8:523211  |
| cg05763097 | chr14 | 103569340 | rs76657117  | C14orf73     | Body                     | chr14:10356  |
| cg06791151 | chr3  | 37034956  | NA          | EPM2AIP1;MT  | TSS200;TSS1              | chr3:370342  |
| cg07007778 | chr13 | 111268017 | NA          | CARKD;CARK   | 5'UTR;1stExo             | chr13:11126  |
| cg13900773 | chr12 | 130824015 | NA          | PIWIL1       | 5'UTR                    | chr12:13082  |
| cg20743065 | chr4  | 53588673  | NA          |              |                          | chr4:535881  |
| cg03877020 | chr6  | 31762680  | NA          | VARS         | Body                     | chr6:317632  |
| cg01879039 | chr1  | 52456656  | NA          | RAB3B        | TSS1500                  | chr1:524559  |
| cg11546621 | chr9  | 139872161 | NA          | PTGDS        | Body                     | chr9:139872  |
| cg01937247 | chr1  | 1229534   | NA          | ACAP3        | Body                     | chr1:122878  |
| cg21396998 | chr6  | 32806006  | NA          | TAP2;TAP2    | Body;Body                | chr6:328062  |
| cg25855592 | chr4  | 1496293   | NA          |              |                          | chr4:149454  |
| cg20529070 | chr20 | 42142751  | NA          | L3MBTL;L3M   | TSS1500;TSS              | chr20:42143  |
| cg08771706 | chr11 | 2890394   | NA          | KCNQ1DN      | TSS1500                  | chr11:28903  |
| cg27075939 | chr13 | 111268702 | NA          | CARKD        | Body                     | chr13:11126  |
| cg00137234 | chr4  | 155703138 | NA          | RBM46        | 5'UTR                    | chr4:155702  |
| cg05716556 | chr17 | 47287410  | NA          | ABI3;GNGT2   | ;TSS200;TSS1500;TSS200   |              |
| cg20692059 | chr14 | 23563979  | NA          | C14orf119;A  | TSS1500;Bod              | chr14:23563  |
| cg21646955 | chr6  | 35108921  | NA          | TCP11;TCP11  | Body;5'UTR               | chr6:351088  |
| cg22407458 | chr6  | 35109121  | rs78614904  | TCP11;TCP11  | 5'UTR;1stExo             | chr6:351088  |
| cg15282732 | chr6  | 150346863 | NA          | RAET1L       | TSS200                   |              |
| cg23008562 | chr11 | 2891065   | NA          | KCNQ1DN      | TSS200                   | chr11:28903  |
| cg15414773 | chr1  | 1100360   | NA          |              |                          | chr1:109804  |
| cg13885561 | chr11 | 2890389   | NA          | KCNQ1DN      | TSS1500                  | chr11:28903  |
| cg19853760 | chr22 | 38071677  | NA          | LGALS1;LGAL  | 1stExon;5'UT             | chr22:38073  |
| cg02929209 | chr4  | 53588595  | NA          |              |                          | chr4:535881  |
| cg01647795 | chr15 | 44969244  | rs78276255  | PATL2        | TSS200                   |              |
| cg14706162 | chr4  | 1496411   | rs73061856  |              |                          | chr4:149454  |
| cg03983364 | chr7  | 101272096 | rs73415222  | MYL10        | Body                     |              |
| cg17390106 | chr6  | 32804555  | NA          | TAP2;TAP2    | Body;Body                | chr6:328062  |
| cg03142586 | chr19 | 58220080  | NA          | ZNF154       | Body                     | chr19:58220  |
| cg03876424 | chr14 | 103569948 | NA          | C14orf73     | Body                     | chr14:10356  |
| cg05316463 | chr14 | 95786663  | rs114506181 | CLMN         | TSS1500                  | chr14:95785  |
| cg27338957 | chr6  | 33267265  | NA          | RGL2;RGL2    | TSS200;TSS2              | (chr6:332663 |
| cg15207422 | chr19 | 19280969  | NA          | LOC729991    | Body;5'UTR;5             | chr19:19280  |
| cg02667348 | chr16 | 88540992  | NA          | ZFPM1        | Body                     | chr16:88539  |
| cg26658272 | chr5  | 1241765   | NA          | SLC6A18      | Body                     | chr5:124244  |
| cg01833923 | chr17 | 47286719  | NA          | GNGT2;ABI3   | ;1stExon;TSS1500;TSS1500 |              |
| cg13104298 | chr7  | 130131905 | NA          | MEST;MEST    | 5'UTR;TSS200             | (chr7:130130 |
| cg25203481 | chr11 | 2891082   | NA          | KCNQ1DN      | TSS200                   | chr11:28903  |

|            |       |           |             |                                        |                                            |
|------------|-------|-----------|-------------|----------------------------------------|--------------------------------------------|
| cg12699433 | chr20 | 42142897  | NA          | L3MBTL;L3M TSS200;TSS200               | (chr20:42143000-42142897)                  |
| cg04709900 | chr2  | 97220393  | NA          |                                        |                                            |
| cg09932405 | chr2  | 121107495 | NA          | INHBB                                  | 3'UTR chr2:121106000-121107495             |
| cg04319873 | chr2  | 164205343 | NA          |                                        | chr2:164204000-164205343                   |
| cg04255770 | chr6  | 32804677  | rs17583244  | TAP2;TAP2                              | Body;Body chr6:328062000-32804677          |
| cg10781814 | chr19 | 19281559  | NA          | LOC729991-1                            | Body;5'UTR;TSS200 chr19:192800000-19281559 |
| cg24143221 | chr6  | 31780526  | NA          | HSPA1L                                 | 5'UTR chr6:317828000-31780526              |
| cg06212135 | chr7  | 130131826 | NA          | MEST;MEST;TSS200                       | (chr7:130130000-130131826)                 |
| cg20073313 | chr8  | 52322009  | NA          | PXDNL                                  | Body chr8:523211000-52322009               |
| cg27324426 | chr19 | 58220837  | NA          | ZNF154                                 | TSS1500 chr19:582200000-58220837           |
| cg08373989 | chr6  | 31780239  | NA          | HSPA1L                                 | 5'UTR chr6:317828000-31780239              |
| cg02145102 | chr6  | 31276418  | rs17192631  |                                        | chr6:312762000-31276418                    |
| cg04457979 | chr11 | 2890647   | NA          | KCNQ1DN                                | TSS1500 chr11:289030000-2890647            |
| cg06778024 | chr16 | 89408567  | rs75540348  | ANKRD11                                | 5'UTR chr16:894080000-89408567             |
| cg22705386 | chr7  | 130131797 | NA          | MEST;MEST;TSS200                       | (chr7:130130000-130131797)                 |
| cg03438552 | chr6  | 32805548  | NA          | TAP2;TAP2                              | Body;Body chr6:328062000-32805548          |
| cg19550904 | chr14 | 103569127 | NA          | C14orf73                               | Body chr14:103560000-103569127             |
| cg05029822 | chr11 | 2891118   | NA          | KCNQ1DN                                | TSS200 chr11:289030000-2891118             |
| cg00980784 | chr17 | 47287577  | NA          | ABI3;GNGT2;TSS200;TSS1500;TSS200       |                                            |
| cg03769055 | chr6  | 30124804  | NA          | TRIM10;TRIM10                          | Body;Body chr6:301240000-30124804          |
| cg27417677 | chr7  | 130130918 | NA          | MESTIT1;MEST;TSS1500                   | (chr7:130130000-130130918)                 |
| cg24696183 | chr11 | 2891360   | NA          | KCNQ1DN                                | Body chr11:289030000-2891360               |
| cg22940798 | chr6  | 32805554  | NA          | TAP2;TAP2                              | Body;Body chr6:328062000-32805554          |
| cg23973272 | chr8  | 52322169  | NA          | PXDNL                                  | Body chr8:523211000-52322169               |
| cg01208224 | chr4  | 6383645   | NA          | PPP2R2C;PPF1                           | TSS200;Body chr4:638020000-6383645         |
| cg12198813 | chr11 | 2891077   | NA          | KCNQ1DN                                | TSS200 chr11:289030000-2891077             |
| cg27547543 | chr6  | 31148524  | NA          |                                        | chr6:311483000-31148524                    |
| cg20362817 | chr6  | 30124687  | rs115594810 | TRIM10;TRIM10                          | Body;Body chr6:301240000-30124687          |
| cg22960869 | chr17 | 47287521  | NA          | ABI3;GNGT2;TSS200;TSS1500;TSS200       |                                            |
| cg04251368 | chr11 | 2890587   | NA          | KCNQ1DN                                | TSS1500 chr11:289030000-2890587            |
| cg06372850 | chr2  | 164205188 | NA          |                                        | chr2:164204000-164205188                   |
| cg20250981 | chr11 | 2890644   | NA          | KCNQ1DN                                | TSS1500 chr11:289030000-2890644            |
| cg04953552 | chr6  | 31276212  | rs1634758   |                                        | chr6:312762000-31276212                    |
| cg21143587 | chr14 | 103569397 | NA          | C14orf73                               | Body chr14:103560000-103569397             |
| cg27513667 | chr16 | 89408403  | rs179504    | ANKRD11                                | 5'UTR chr16:894080000-89408403             |
| cg17839611 | chr17 | 47286802  | NA          | ABI3;ABI3;GNGT2;TSS1500;TSS1500;TSS200 |                                            |
| cg25451120 | chr17 | 47287444  | NA          | ABI3;GNGT2;TSS200;TSS1500;TSS200       |                                            |
| cg02611863 | chr20 | 42143096  | NA          | L3MBTL;L3M                             | 5'UTR;1stExon chr20:421430000-42143096     |
| cg10249538 | chr7  | 130131829 | NA          | MEST;MEST;TSS200                       | (chr7:130130000-130131829)                 |
| cg09304357 | chr2  | 97220596  | NA          |                                        |                                            |
| cg13081704 | chr11 | 2890457   | NA          | KCNQ1DN                                | TSS1500 chr11:289030000-2890457            |
| cg21667116 | chr7  | 130131359 | NA          | MEST;MEST;TSS1500;5'UTR                | (chr7:130130000-130131359)                 |
| cg11708721 | chr1  | 117530009 | rs55948695  | PTGFRN                                 | 3'UTR                                      |
| cg07592963 | chr11 | 2890649   | NA          | KCNQ1DN                                | TSS1500 chr11:289030000-2890649            |
| cg11294513 | chr19 | 58220295  | NA          | ZNF154                                 | Body chr19:582200000-58220295              |

|            |       |           |             |             |                           |               |
|------------|-------|-----------|-------------|-------------|---------------------------|---------------|
| cg06478886 | chr5  | 135416029 | NA          |             |                           | chr5:135416:  |
| cg09554951 | chr11 | 2890725   | NA          | KCNQ1DN     | TSS1500                   | chr11:28903:  |
| cg23156962 | chr7  | 130131367 | NA          | MEST;MEST;  | TSS1500;5'U               | chr7:130130:  |
| cg24780501 | chr11 | 2890450   | NA          | KCNQ1DN     | TSS1500                   | chr11:28903:  |
| cg13563634 | chr6  | 32805684  | NA          | TAP2;TAP2   | Body;Body                 | chr6:328062:  |
| cg19340941 | chr4  | 155702931 | NA          | RBM46       | 5'UTR                     | chr4:155702:  |
| cg19602728 | chr4  | 1496334   | rs73061856  |             |                           | chr4:149454:  |
| cg15937641 | chr1  | 117529619 | NA          | PTGFRN      | 3'UTR                     |               |
| cg21629528 | chr7  | 130131921 | rs116603785 | MEST;MEST;  | 5'UTR;TSS20               | (chr7:130130: |
| cg06797389 | chr15 | 44969481  | NA          | PATL2       | TSS1500                   |               |
| cg10300188 | chr11 | 2890577   | NA          | KCNQ1DN     | TSS1500                   | chr11:28903:  |
| cg09357589 | chr6  | 31148552  | NA          |             |                           | chr6:311483:  |
| cg01107178 | chr16 | 89408248  | NA          | ANKRD11     | 5'UTR                     | chr16:89408:  |
| cg03234186 | chr19 | 58220657  | NA          | ZNF154      | TSS200                    | chr19:58220:  |
| cg04786207 | chr7  | 130131691 | rs73724326  | MEST;MEST;  | TSS1500;5'U               | chr7:130130:  |
| cg01268824 | chr19 | 58220818  | NA          | ZNF154      | TSS1500                   | chr19:58220:  |
| cg25629418 | chr12 | 1929265   | NA          | LRTM2;LRTM  | TSS200;TSS200;Body;TSS2   |               |
| cg26685246 | chr6  | 32805692  | NA          | TAP2;TAP2   | Body;Body                 | chr6:328062:  |
| cg08246619 | chr11 | 2890454   | NA          | KCNQ1DN     | TSS1500                   | chr11:28903:  |
| cg12506930 | chr19 | 58220718  | NA          | ZNF154      | TSS200                    | chr19:58220:  |
| cg26818629 | chr6  | 31148516  | NA          |             |                           | chr6:311483:  |
| cg26502817 | chr6  | 31779953  | NA          | HSPA1L      | 5'UTR                     | chr6:317828:  |
| cg26334023 | chr17 | 47287492  | NA          | ABI3;GNGT2; | TSS200;TSS1500;TSS200     |               |
| cg14582642 | chr11 | 2890319   | NA          | KCNQ1DN     | TSS1500                   | chr11:28903:  |
| cg02646491 | chr11 | 2890710   | rs7114157   | KCNQ1DN     | TSS1500                   | chr11:28903:  |
| cg15330298 | chr20 | 42143174  | NA          | L3MBTL;L3M  | 5'UTR;1stExo              | chr20:42143:  |
| cg09502866 | chr11 | 2890473   | NA          | KCNQ1DN     | TSS1500                   | chr11:28903:  |
| cg11805138 | chr6  | 31148332  | rs115103823 |             |                           | chr6:311483:  |
| cg12854186 | chr6  | 32805398  | rs56115039  | TAP2;TAP2   | Body;Body                 | chr6:328062:  |
| cg26504305 | chr19 | 19281019  | NA          | LOC729991-1 | Body;5'UTR;5'             | chr19:19280:  |
| cg21753226 | chr11 | 2890668   | rs7114157   | KCNQ1DN     | TSS1500                   | chr11:28903:  |
| cg06818047 | chr1  | 1229105   | rs7552099   | ACAP3       | Body                      | chr1:122878:  |
| cg23331653 | chr12 | 1929348   | NA          | LRTM2;LRTM  | TSS200;TSS200;Body;TSS2   |               |
| cg04678950 | chr7  | 130131403 | NA          | MEST;MEST;  | TSS1500;5'U               | chr7:130130:  |
| cg19386484 | chr7  | 130131709 | NA          | MEST;MEST;  | TSS1500;5'U               | chr7:130130:  |
| cg18797653 | chr5  | 135416613 | NA          | MIR886      | TSS1500                   | chr5:135415:  |
| cg16615357 | chr5  | 135416594 | NA          | MIR886      | TSS1500                   | chr5:135415:  |
| cg12821804 | chr11 | 2890705   | rs7114157   | KCNQ1DN     | TSS1500                   | chr11:28903:  |
| cg11608150 | chr5  | 135415948 | NA          |             |                           | chr5:135416:  |
| cg17239974 | chr11 | 2890629   | NA          | KCNQ1DN     | TSS1500                   | chr11:28903:  |
| cg26457809 | chr11 | 2890617   | NA          | KCNQ1DN     | TSS1500                   | chr11:28903:  |
| cg12347392 | chr7  | 130131676 | rs73724326  | MEST;MEST;  | TSS1500;5'U               | chr7:130130:  |
| cg26738614 | chr12 | 1929588   | NA          | LRTM2;LRTM  | 1stExon;5'UTR;1stExon;5'U |               |
| cg08745965 | chr5  | 135416529 | rs9327740   | MIR886      | TSS1500                   | chr5:135415:  |
| cg08762424 | chr6  | 31275881  | rs1634760   |             |                           | chr6:312762:  |

|            |       |           |             |                                     |         |              |
|------------|-------|-----------|-------------|-------------------------------------|---------|--------------|
| cg21746969 | chr12 | 1929551   | rs139835495 | LRTM2;LRTM1stExon;5'UTR;1stExon;5'U |         |              |
| cg04481923 | chr5  | 135416205 | NA          | MIR886                              | Body    | chr5:135416: |
| cg01515136 | chr1  | 1229589   | NA          | ACAP3                               | Body    | chr1:1228780 |
| cg26896946 | chr5  | 135416405 | NA          | MIR886                              | TSS200  | chr5:135416: |
| cg25340688 | chr5  | 135416398 | NA          | MIR886                              | TSS200  | chr5:135416: |
| cg06536614 | chr5  | 135416381 | NA          | MIR886                              | TSS200  | chr5:135416: |
| cg00124993 | chr5  | 135416412 | NA          | MIR886                              | TSS200  | chr5:135416: |
| cg18678645 | chr5  | 135416331 | NA          | MIR886                              | TSS200  | chr5:135416: |
| cg22389375 | chr11 | 2890670   | rs7114157   | KCNQ1DN                             | TSS1500 | chr11:289030 |
| cg07158503 | chr5  | 135415693 | NA          |                                     |         | chr5:135416: |
| cg26328633 | chr5  | 135416394 | NA          | MIR886                              | TSS200  | chr5:135416: |
| cg23252259 | chr6  | 31148612  | rs6937752   |                                     |         | chr6:3114830 |
| cg05290058 | chr11 | 2890551   | NA          | KCNQ1DN                             | TSS1500 | chr11:289030 |

| Group A mean | Group B mean | Group C mean | Difference A-B | Difference A-C | Difference B-C |
|--------------|--------------|--------------|----------------|----------------|----------------|
| 0.262        | 0.316        | 0.329        | -0.067         | -0.054         | -0.012         |
| 0.620        | 0.670        | 0.679        | -0.059         | -0.050         | -0.009         |
| 0.222        | 0.259        | 0.273        | -0.051         | -0.038         | -0.014         |
| 0.586        | 0.621        | 0.636        | -0.050         | -0.035         | -0.015         |
| 0.580        | 0.530        | 0.630        | -0.049         | 0.050          | -0.099         |
| 0.522        | 0.485        | 0.570        | -0.047         | 0.038          | -0.085         |
| 0.206        | 0.239        | 0.250        | -0.044         | -0.033         | -0.011         |
| 0.728        | 0.662        | 0.767        | -0.039         | 0.067          | -0.106         |
| 0.777        | 0.718        | 0.814        | -0.037         | 0.059          | -0.096         |
| 0.787        | 0.804        | 0.823        | -0.037         | -0.017         | -0.019         |
| 0.644        | 0.595        | 0.680        | -0.035         | 0.050          | -0.085         |
| 0.649        | 0.676        | 0.683        | -0.034         | -0.027         | -0.008         |
| 0.743        | 0.677        | 0.778        | -0.034         | 0.066          | -0.100         |
| 0.685        | 0.623        | 0.718        | -0.034         | 0.062          | -0.096         |
| 0.720        | 0.663        | 0.754        | -0.034         | 0.058          | -0.092         |
| 0.592        | 0.608        | 0.625        | -0.033         | -0.016         | -0.017         |
| 0.398        | 0.426        | 0.430        | -0.032         | -0.028         | -0.004         |
| 0.630        | 0.571        | 0.661        | -0.032         | 0.059          | -0.091         |
| 0.722        | 0.744        | 0.753        | -0.031         | -0.022         | -0.009         |
| 0.826        | 0.850        | 0.856        | -0.030         | -0.024         | -0.006         |
| 0.671        | 0.675        | 0.699        | -0.028         | -0.004         | -0.025         |
| 0.544        | 0.563        | 0.571        | -0.026         | -0.019         | -0.007         |
| 0.498        | 0.515        | 0.522        | -0.024         | -0.017         | -0.007         |
| 0.367        | 0.379        | 0.391        | -0.024         | -0.012         | -0.012         |
| 0.785        | 0.803        | 0.809        | -0.024         | -0.018         | -0.006         |
| 0.152        | 0.169        | 0.176        | -0.024         | -0.017         | -0.007         |
| 0.621        | 0.643        | 0.645        | -0.024         | -0.022         | -0.002         |
| 0.830        | 0.787        | 0.854        | -0.024         | 0.043          | -0.067         |
| 0.711        | 0.725        | 0.735        | -0.024         | -0.014         | -0.010         |
| 0.552        | 0.560        | 0.576        | -0.024         | -0.008         | -0.015         |
| 0.586        | 0.596        | 0.609        | -0.023         | -0.011         | -0.013         |
| 0.733        | 0.745        | 0.757        | -0.023         | -0.011         | -0.012         |
| 0.159        | 0.171        | 0.182        | -0.023         | -0.013         | -0.011         |
| 0.757        | 0.772        | 0.780        | -0.023         | -0.015         | -0.008         |
| 0.673        | 0.681        | 0.696        | -0.023         | -0.008         | -0.015         |
| 0.762        | 0.780        | 0.785        | -0.023         | -0.018         | -0.004         |
| 0.854        | 0.806        | 0.876        | -0.021         | 0.048          | -0.069         |
| 0.881        | 0.894        | 0.902        | -0.021         | -0.013         | -0.009         |
| 0.683        | 0.698        | 0.704        | -0.021         | -0.015         | -0.006         |
| 0.489        | 0.509        | 0.510        | -0.021         | -0.019         | -0.001         |
| 0.671        | 0.621        | 0.691        | -0.021         | 0.050          | -0.071         |

|       |       |       |        |        |        |
|-------|-------|-------|--------|--------|--------|
| 0.532 | 0.550 | 0.552 | -0.021 | -0.019 | -0.002 |
| 0.812 | 0.819 | 0.833 | -0.021 | -0.007 | -0.014 |
| 0.179 | 0.208 | 0.199 | -0.020 | -0.028 | 0.008  |
| 0.180 | 0.189 | 0.199 | -0.020 | -0.009 | -0.010 |
| 0.786 | 0.787 | 0.806 | -0.020 | 0.000  | -0.019 |
| 0.144 | 0.160 | 0.163 | -0.019 | -0.017 | -0.003 |
| 0.606 | 0.619 | 0.625 | -0.019 | -0.013 | -0.006 |
| 0.756 | 0.766 | 0.775 | -0.019 | -0.010 | -0.009 |
| 0.540 | 0.557 | 0.559 | -0.019 | -0.016 | -0.003 |
| 0.426 | 0.438 | 0.445 | -0.019 | -0.012 | -0.007 |
| 0.770 | 0.780 | 0.788 | -0.019 | -0.010 | -0.008 |
| 0.760 | 0.784 | 0.779 | -0.018 | -0.024 | 0.005  |
| 0.672 | 0.672 | 0.690 | -0.018 | 0.000  | -0.018 |
| 0.168 | 0.174 | 0.186 | -0.018 | -0.006 | -0.012 |
| 0.735 | 0.748 | 0.752 | -0.017 | -0.013 | -0.004 |
| 0.649 | 0.660 | 0.665 | -0.017 | -0.011 | -0.005 |
| 0.149 | 0.152 | 0.165 | -0.017 | -0.003 | -0.013 |
| 0.767 | 0.767 | 0.783 | -0.016 | -0.001 | -0.016 |
| 0.394 | 0.399 | 0.410 | -0.016 | -0.005 | -0.011 |
| 0.773 | 0.779 | 0.789 | -0.016 | -0.006 | -0.011 |
| 0.068 | 0.079 | 0.085 | -0.016 | -0.010 | -0.006 |
| 0.463 | 0.484 | 0.479 | -0.016 | -0.022 | 0.006  |
| 0.651 | 0.651 | 0.667 | -0.016 | 0.000  | -0.016 |
| 0.476 | 0.478 | 0.492 | -0.016 | -0.002 | -0.014 |
| 0.597 | 0.619 | 0.612 | -0.016 | -0.023 | 0.007  |
| 0.423 | 0.435 | 0.439 | -0.016 | -0.011 | -0.005 |
| 0.422 | 0.408 | 0.438 | -0.016 | 0.014  | -0.030 |
| 0.221 | 0.229 | 0.236 | -0.016 | -0.008 | -0.008 |
| 0.831 | 0.834 | 0.846 | -0.015 | -0.002 | -0.013 |
| 0.567 | 0.568 | 0.581 | -0.015 | -0.001 | -0.014 |
| 0.097 | 0.110 | 0.111 | -0.015 | -0.013 | -0.001 |
| 0.785 | 0.804 | 0.800 | -0.015 | -0.019 | 0.005  |
| 0.314 | 0.335 | 0.329 | -0.014 | -0.021 | 0.006  |
| 0.748 | 0.754 | 0.762 | -0.014 | -0.006 | -0.009 |
| 0.740 | 0.742 | 0.754 | -0.014 | -0.002 | -0.012 |
| 0.090 | 0.100 | 0.104 | -0.014 | -0.011 | -0.004 |
| 0.582 | 0.589 | 0.596 | -0.014 | -0.007 | -0.007 |
| 0.672 | 0.678 | 0.686 | -0.014 | -0.006 | -0.008 |
| 0.906 | 0.886 | 0.920 | -0.014 | 0.020  | -0.034 |
| 0.866 | 0.868 | 0.880 | -0.014 | -0.002 | -0.012 |
| 0.123 | 0.130 | 0.137 | -0.014 | -0.007 | -0.006 |
| 0.519 | 0.528 | 0.533 | -0.014 | -0.010 | -0.004 |
| 0.528 | 0.511 | 0.542 | -0.014 | 0.018  | -0.031 |
| 0.094 | 0.103 | 0.108 | -0.014 | -0.008 | -0.005 |
| 0.783 | 0.798 | 0.797 | -0.014 | -0.015 | 0.002  |

|       |       |       |        |        |        |
|-------|-------|-------|--------|--------|--------|
| 0.814 | 0.824 | 0.827 | -0.013 | -0.010 | -0.003 |
| 0.653 | 0.652 | 0.666 | -0.013 | 0.001  | -0.014 |
| 0.272 | 0.286 | 0.284 | -0.013 | -0.014 | 0.001  |
| 0.310 | 0.307 | 0.323 | -0.013 | 0.003  | -0.016 |
| 0.708 | 0.727 | 0.721 | -0.013 | -0.018 | 0.006  |
| 0.742 | 0.749 | 0.754 | -0.012 | -0.007 | -0.005 |
| 0.846 | 0.858 | 0.858 | -0.012 | -0.011 | -0.001 |
| 0.592 | 0.592 | 0.604 | -0.012 | 0.000  | -0.013 |
| 0.698 | 0.715 | 0.710 | -0.012 | -0.016 | 0.004  |
| 0.702 | 0.690 | 0.714 | -0.012 | 0.012  | -0.024 |
| 0.069 | 0.079 | 0.081 | -0.012 | -0.010 | -0.002 |
| 0.143 | 0.151 | 0.155 | -0.012 | -0.009 | -0.003 |
| 0.870 | 0.878 | 0.882 | -0.012 | -0.008 | -0.004 |
| 0.591 | 0.609 | 0.603 | -0.012 | -0.018 | 0.007  |
| 0.107 | 0.127 | 0.119 | -0.011 | -0.019 | 0.008  |
| 0.370 | 0.374 | 0.381 | -0.011 | -0.005 | -0.007 |
| 0.653 | 0.657 | 0.664 | -0.011 | -0.004 | -0.007 |
| 0.753 | 0.757 | 0.765 | -0.011 | -0.004 | -0.008 |
| 0.351 | 0.355 | 0.362 | -0.011 | -0.004 | -0.007 |
| 0.061 | 0.065 | 0.071 | -0.011 | -0.004 | -0.006 |
| 0.703 | 0.693 | 0.713 | -0.011 | 0.010  | -0.021 |
| 0.811 | 0.819 | 0.822 | -0.010 | -0.008 | -0.002 |
| 0.356 | 0.377 | 0.367 | -0.010 | -0.021 | 0.010  |
| 0.066 | 0.073 | 0.076 | -0.010 | -0.007 | -0.003 |
| 0.095 | 0.108 | 0.106 | -0.010 | -0.013 | 0.003  |
| 0.588 | 0.580 | 0.599 | -0.010 | 0.009  | -0.019 |
| 0.571 | 0.585 | 0.581 | -0.010 | -0.014 | 0.004  |
| 0.680 | 0.679 | 0.690 | -0.010 | 0.000  | -0.010 |
| 0.608 | 0.618 | 0.617 | -0.010 | -0.010 | 0.001  |
| 0.880 | 0.893 | 0.890 | -0.010 | -0.013 | 0.003  |
| 0.919 | 0.925 | 0.928 | -0.010 | -0.007 | -0.003 |
| 0.546 | 0.553 | 0.556 | -0.010 | -0.006 | -0.003 |
| 0.085 | 0.095 | 0.094 | -0.009 | -0.011 | 0.001  |
| 0.264 | 0.274 | 0.274 | -0.009 | -0.009 | 0.000  |
| 0.134 | 0.130 | 0.143 | -0.009 | 0.004  | -0.013 |
| 0.097 | 0.106 | 0.106 | -0.009 | -0.010 | 0.001  |
| 0.306 | 0.320 | 0.315 | -0.009 | -0.014 | 0.005  |
| 0.815 | 0.811 | 0.824 | -0.009 | 0.004  | -0.013 |
| 0.909 | 0.912 | 0.918 | -0.009 | -0.002 | -0.007 |
| 0.776 | 0.797 | 0.785 | -0.009 | -0.021 | 0.012  |
| 0.454 | 0.456 | 0.463 | -0.009 | -0.002 | -0.007 |
| 0.554 | 0.577 | 0.562 | -0.009 | -0.023 | 0.015  |
| 0.790 | 0.768 | 0.799 | -0.008 | 0.022  | -0.031 |
| 0.203 | 0.196 | 0.211 | -0.008 | 0.006  | -0.015 |
| 0.074 | 0.078 | 0.082 | -0.008 | -0.004 | -0.004 |

|       |       |       |        |        |        |
|-------|-------|-------|--------|--------|--------|
| 0.041 | 0.045 | 0.050 | -0.008 | -0.003 | -0.005 |
| 0.526 | 0.523 | 0.534 | -0.008 | 0.002  | -0.010 |
| 0.135 | 0.138 | 0.143 | -0.008 | -0.003 | -0.005 |
| 0.075 | 0.073 | 0.083 | -0.008 | 0.001  | -0.010 |
| 0.927 | 0.926 | 0.935 | -0.008 | 0.001  | -0.009 |
| 0.874 | 0.878 | 0.882 | -0.008 | -0.004 | -0.004 |
| 0.587 | 0.596 | 0.595 | -0.008 | -0.009 | 0.001  |
| 0.097 | 0.101 | 0.105 | -0.008 | -0.004 | -0.004 |
| 0.041 | 0.043 | 0.049 | -0.008 | -0.002 | -0.006 |
| 0.918 | 0.923 | 0.926 | -0.008 | -0.005 | -0.003 |
| 0.784 | 0.781 | 0.792 | -0.008 | 0.003  | -0.011 |
| 0.520 | 0.525 | 0.528 | -0.008 | -0.005 | -0.002 |
| 0.041 | 0.046 | 0.049 | -0.008 | -0.005 | -0.002 |
| 0.301 | 0.292 | 0.308 | -0.008 | 0.009  | -0.017 |
| 0.662 | 0.661 | 0.669 | -0.008 | 0.000  | -0.008 |
| 0.031 | 0.030 | 0.039 | -0.008 | 0.002  | -0.009 |
| 0.060 | 0.067 | 0.067 | -0.007 | -0.007 | -0.001 |
| 0.926 | 0.935 | 0.933 | -0.007 | -0.009 | 0.002  |
| 0.422 | 0.424 | 0.429 | -0.007 | -0.002 | -0.005 |
| 0.177 | 0.180 | 0.185 | -0.007 | -0.002 | -0.005 |
| 0.067 | 0.068 | 0.074 | -0.007 | -0.001 | -0.006 |
| 0.045 | 0.047 | 0.053 | -0.007 | -0.002 | -0.006 |
| 0.401 | 0.403 | 0.408 | -0.007 | -0.002 | -0.006 |
| 0.497 | 0.508 | 0.504 | -0.007 | -0.010 | 0.003  |
| 0.963 | 0.966 | 0.970 | -0.007 | -0.002 | -0.005 |
| 0.027 | 0.028 | 0.034 | -0.007 | -0.001 | -0.006 |
| 0.816 | 0.838 | 0.823 | -0.007 | -0.022 | 0.016  |
| 0.579 | 0.584 | 0.585 | -0.007 | -0.005 | -0.002 |
| 0.425 | 0.436 | 0.432 | -0.007 | -0.011 | 0.004  |
| 0.351 | 0.355 | 0.358 | -0.007 | -0.005 | -0.002 |
| 0.331 | 0.348 | 0.337 | -0.007 | -0.017 | 0.010  |
| 0.754 | 0.759 | 0.761 | -0.007 | -0.004 | -0.002 |
| 0.931 | 0.930 | 0.938 | -0.007 | 0.001  | -0.008 |
| 0.110 | 0.112 | 0.117 | -0.007 | -0.001 | -0.005 |
| 0.244 | 0.235 | 0.250 | -0.007 | 0.008  | -0.015 |
| 0.076 | 0.079 | 0.082 | -0.007 | -0.003 | -0.003 |
| 0.802 | 0.815 | 0.808 | -0.007 | -0.013 | 0.006  |
| 0.859 | 0.849 | 0.865 | -0.006 | 0.009  | -0.016 |
| 0.843 | 0.846 | 0.849 | -0.006 | -0.003 | -0.003 |
| 0.631 | 0.636 | 0.638 | -0.006 | -0.005 | -0.001 |
| 0.881 | 0.878 | 0.887 | -0.006 | 0.003  | -0.009 |
| 0.046 | 0.048 | 0.052 | -0.006 | -0.002 | -0.004 |
| 0.822 | 0.828 | 0.828 | -0.006 | -0.006 | 0.000  |
| 0.024 | 0.028 | 0.030 | -0.006 | -0.004 | -0.002 |
| 0.099 | 0.101 | 0.105 | -0.006 | -0.003 | -0.003 |



|       |       |       |        |        |        |
|-------|-------|-------|--------|--------|--------|
| 0.362 | 0.368 | 0.368 | -0.006 | -0.006 | 0.000  |
| 0.036 | 0.039 | 0.042 | -0.006 | -0.003 | -0.003 |
| 0.058 | 0.064 | 0.064 | -0.005 | -0.006 | 0.001  |
| 0.505 | 0.511 | 0.510 | -0.005 | -0.006 | 0.001  |
| 0.900 | 0.901 | 0.905 | -0.005 | -0.001 | -0.004 |
| 0.740 | 0.744 | 0.745 | -0.005 | -0.004 | -0.001 |
| 0.109 | 0.114 | 0.115 | -0.005 | -0.004 | -0.001 |
| 0.202 | 0.196 | 0.207 | -0.005 | 0.005  | -0.010 |
| 0.040 | 0.040 | 0.045 | -0.005 | 0.000  | -0.005 |
| 0.069 | 0.071 | 0.074 | -0.005 | -0.002 | -0.003 |
| 0.471 | 0.478 | 0.476 | -0.005 | -0.006 | 0.001  |
| 0.118 | 0.123 | 0.123 | -0.005 | -0.005 | -0.001 |
| 0.711 | 0.724 | 0.716 | -0.005 | -0.013 | 0.008  |
| 0.496 | 0.507 | 0.501 | -0.005 | -0.011 | 0.006  |
| 0.112 | 0.116 | 0.117 | -0.005 | -0.004 | -0.001 |
| 0.029 | 0.026 | 0.034 | -0.005 | 0.003  | -0.008 |
| 0.092 | 0.095 | 0.097 | -0.005 | -0.003 | -0.002 |
| 0.385 | 0.389 | 0.390 | -0.005 | -0.004 | 0.000  |
| 0.510 | 0.520 | 0.515 | -0.005 | -0.011 | 0.006  |
| 0.624 | 0.629 | 0.628 | -0.005 | -0.005 | 0.000  |
| 0.790 | 0.799 | 0.794 | -0.005 | -0.010 | 0.005  |
| 0.030 | 0.038 | 0.034 | -0.005 | -0.008 | 0.004  |
| 0.281 | 0.290 | 0.286 | -0.005 | -0.009 | 0.004  |
| 0.326 | 0.337 | 0.330 | -0.005 | -0.012 | 0.007  |
| 0.596 | 0.603 | 0.601 | -0.004 | -0.007 | 0.002  |
| 0.154 | 0.156 | 0.159 | -0.004 | -0.002 | -0.002 |
| 0.490 | 0.492 | 0.494 | -0.004 | -0.002 | -0.003 |
| 0.569 | 0.582 | 0.573 | -0.004 | -0.013 | 0.009  |
| 0.034 | 0.037 | 0.038 | -0.004 | -0.003 | -0.002 |
| 0.087 | 0.087 | 0.092 | -0.004 | 0.000  | -0.004 |
| 0.052 | 0.055 | 0.057 | -0.004 | -0.002 | -0.002 |
| 0.876 | 0.878 | 0.880 | -0.004 | -0.002 | -0.002 |
| 0.951 | 0.955 | 0.955 | -0.004 | -0.004 | 0.000  |
| 0.672 | 0.692 | 0.676 | -0.004 | -0.020 | 0.016  |
| 0.259 | 0.247 | 0.263 | -0.004 | 0.012  | -0.016 |
| 0.037 | 0.033 | 0.041 | -0.004 | 0.004  | -0.008 |
| 0.554 | 0.556 | 0.558 | -0.004 | -0.002 | -0.002 |
| 0.057 | 0.058 | 0.061 | -0.004 | -0.001 | -0.003 |
| 0.162 | 0.164 | 0.166 | -0.004 | -0.001 | -0.003 |
| 0.925 | 0.926 | 0.928 | -0.004 | -0.001 | -0.002 |
| 0.298 | 0.302 | 0.302 | -0.004 | -0.004 | 0.000  |
| 0.912 | 0.914 | 0.916 | -0.004 | -0.001 | -0.002 |
| 0.922 | 0.923 | 0.926 | -0.004 | -0.001 | -0.003 |
| 0.181 | 0.185 | 0.185 | -0.004 | -0.004 | 0.000  |
| 0.404 | 0.398 | 0.408 | -0.004 | 0.006  | -0.010 |

|       |       |       |        |        |        |
|-------|-------|-------|--------|--------|--------|
| 0.501 | 0.508 | 0.505 | -0.004 | -0.007 | 0.003  |
| 0.088 | 0.093 | 0.092 | -0.004 | -0.004 | 0.001  |
| 0.753 | 0.748 | 0.756 | -0.003 | 0.005  | -0.008 |
| 0.160 | 0.162 | 0.163 | -0.003 | -0.002 | -0.001 |
| 0.231 | 0.245 | 0.234 | -0.003 | -0.014 | 0.011  |
| 0.036 | 0.035 | 0.040 | -0.003 | 0.001  | -0.004 |
| 0.094 | 0.093 | 0.097 | -0.003 | 0.001  | -0.004 |
| 0.955 | 0.957 | 0.958 | -0.003 | -0.003 | -0.001 |
| 0.032 | 0.031 | 0.035 | -0.003 | 0.001  | -0.004 |
| 0.042 | 0.045 | 0.046 | -0.003 | -0.003 | 0.000  |
| 0.911 | 0.910 | 0.914 | -0.003 | 0.001  | -0.004 |
| 0.069 | 0.075 | 0.073 | -0.003 | -0.006 | 0.003  |
| 0.959 | 0.959 | 0.962 | -0.003 | 0.000  | -0.003 |
| 0.041 | 0.042 | 0.045 | -0.003 | -0.001 | -0.002 |
| 0.031 | 0.034 | 0.035 | -0.003 | -0.003 | 0.000  |
| 0.034 | 0.036 | 0.037 | -0.003 | -0.002 | -0.001 |
| 0.829 | 0.830 | 0.832 | -0.003 | -0.001 | -0.002 |
| 0.049 | 0.046 | 0.052 | -0.003 | 0.003  | -0.006 |
| 0.723 | 0.671 | 0.726 | -0.003 | 0.052  | -0.055 |
| 0.073 | 0.074 | 0.076 | -0.003 | -0.001 | -0.002 |
| 0.905 | 0.904 | 0.908 | -0.003 | 0.001  | -0.004 |
| 0.031 | 0.032 | 0.034 | -0.003 | -0.001 | -0.002 |
| 0.652 | 0.664 | 0.654 | -0.003 | -0.012 | 0.009  |
| 0.049 | 0.058 | 0.052 | -0.003 | -0.008 | 0.006  |
| 0.655 | 0.661 | 0.658 | -0.003 | -0.005 | 0.003  |
| 0.052 | 0.058 | 0.055 | -0.003 | -0.006 | 0.003  |
| 0.130 | 0.135 | 0.133 | -0.003 | -0.005 | 0.002  |
| 0.041 | 0.043 | 0.043 | -0.003 | -0.003 | 0.000  |
| 0.044 | 0.046 | 0.046 | -0.003 | -0.002 | 0.000  |
| 0.491 | 0.479 | 0.493 | -0.003 | 0.012  | -0.015 |
| 0.924 | 0.925 | 0.927 | -0.003 | 0.000  | -0.002 |
| 0.038 | 0.039 | 0.041 | -0.003 | -0.001 | -0.002 |
| 0.026 | 0.025 | 0.028 | -0.003 | 0.000  | -0.003 |
| 0.930 | 0.937 | 0.933 | -0.003 | -0.007 | 0.004  |
| 0.195 | 0.177 | 0.197 | -0.002 | 0.018  | -0.020 |
| 0.025 | 0.025 | 0.027 | -0.002 | 0.000  | -0.002 |
| 0.885 | 0.884 | 0.887 | -0.002 | 0.001  | -0.004 |
| 0.611 | 0.610 | 0.614 | -0.002 | 0.001  | -0.003 |
| 0.034 | 0.034 | 0.036 | -0.002 | -0.001 | -0.002 |
| 0.031 | 0.032 | 0.034 | -0.002 | 0.000  | -0.002 |
| 0.055 | 0.059 | 0.058 | -0.002 | -0.004 | 0.002  |
| 0.557 | 0.560 | 0.559 | -0.002 | -0.004 | 0.001  |
| 0.511 | 0.482 | 0.514 | -0.002 | 0.030  | -0.032 |
| 0.485 | 0.488 | 0.487 | -0.002 | -0.003 | 0.001  |
| 0.962 | 0.966 | 0.965 | -0.002 | -0.004 | 0.001  |

|       |       |       |        |        |        |
|-------|-------|-------|--------|--------|--------|
| 0.029 | 0.029 | 0.031 | -0.002 | 0.000  | -0.002 |
| 0.120 | 0.120 | 0.122 | -0.002 | 0.000  | -0.003 |
| 0.036 | 0.038 | 0.039 | -0.002 | -0.002 | 0.000  |
| 0.129 | 0.126 | 0.131 | -0.002 | 0.003  | -0.005 |
| 0.439 | 0.437 | 0.441 | -0.002 | 0.002  | -0.004 |
| 0.578 | 0.582 | 0.581 | -0.002 | -0.003 | 0.001  |
| 0.040 | 0.040 | 0.042 | -0.002 | 0.000  | -0.002 |
| 0.614 | 0.629 | 0.616 | -0.002 | -0.015 | 0.013  |
| 0.120 | 0.121 | 0.122 | -0.002 | -0.001 | -0.001 |
| 0.603 | 0.604 | 0.605 | -0.002 | -0.001 | -0.001 |
| 0.061 | 0.065 | 0.063 | -0.002 | -0.004 | 0.002  |
| 0.037 | 0.042 | 0.039 | -0.002 | -0.004 | 0.002  |
| 0.244 | 0.251 | 0.246 | -0.002 | -0.007 | 0.005  |
| 0.788 | 0.785 | 0.790 | -0.002 | 0.003  | -0.005 |
| 0.046 | 0.049 | 0.048 | -0.002 | -0.003 | 0.001  |
| 0.070 | 0.074 | 0.072 | -0.002 | -0.004 | 0.002  |
| 0.043 | 0.042 | 0.045 | -0.002 | 0.001  | -0.003 |
| 0.104 | 0.103 | 0.106 | -0.002 | 0.002  | -0.003 |
| 0.687 | 0.684 | 0.688 | -0.002 | 0.002  | -0.004 |
| 0.048 | 0.050 | 0.050 | -0.002 | -0.002 | 0.001  |
| 0.969 | 0.971 | 0.971 | -0.002 | -0.002 | 0.000  |
| 0.021 | 0.021 | 0.023 | -0.002 | 0.000  | -0.002 |
| 0.831 | 0.829 | 0.833 | -0.002 | 0.002  | -0.004 |
| 0.071 | 0.078 | 0.073 | -0.002 | -0.007 | 0.005  |
| 0.024 | 0.026 | 0.026 | -0.002 | -0.002 | 0.000  |
| 0.027 | 0.028 | 0.028 | -0.002 | -0.001 | 0.000  |
| 0.026 | 0.025 | 0.027 | -0.002 | 0.000  | -0.002 |
| 0.032 | 0.034 | 0.034 | -0.002 | -0.001 | 0.000  |
| 0.076 | 0.076 | 0.078 | -0.002 | 0.000  | -0.002 |
| 0.064 | 0.064 | 0.066 | -0.002 | 0.000  | -0.002 |
| 0.069 | 0.071 | 0.071 | -0.002 | -0.001 | 0.000  |
| 0.030 | 0.035 | 0.032 | -0.002 | -0.005 | 0.003  |
| 0.956 | 0.956 | 0.958 | -0.002 | 0.000  | -0.002 |
| 0.910 | 0.911 | 0.912 | -0.002 | -0.001 | 0.000  |
| 0.923 | 0.922 | 0.925 | -0.002 | 0.001  | -0.002 |
| 0.778 | 0.774 | 0.779 | -0.002 | 0.004  | -0.005 |
| 0.032 | 0.033 | 0.034 | -0.002 | -0.001 | -0.001 |
| 0.026 | 0.030 | 0.027 | -0.002 | -0.004 | 0.002  |
| 0.905 | 0.910 | 0.907 | -0.002 | -0.005 | 0.003  |
| 0.963 | 0.963 | 0.965 | -0.002 | 0.000  | -0.001 |
| 0.899 | 0.900 | 0.900 | -0.002 | -0.001 | -0.001 |
| 0.045 | 0.046 | 0.046 | -0.002 | -0.001 | -0.001 |
| 0.025 | 0.028 | 0.027 | -0.002 | -0.003 | 0.001  |
| 0.553 | 0.553 | 0.555 | -0.001 | 0.001  | -0.002 |
| 0.044 | 0.044 | 0.046 | -0.001 | 0.001  | -0.002 |

|       |       |       |        |        |        |
|-------|-------|-------|--------|--------|--------|
| 0.280 | 0.273 | 0.281 | -0.001 | 0.007  | -0.008 |
| 0.046 | 0.046 | 0.047 | -0.001 | 0.000  | -0.002 |
| 0.981 | 0.979 | 0.983 | -0.001 | 0.002  | -0.004 |
| 0.033 | 0.033 | 0.034 | -0.001 | -0.001 | -0.001 |
| 0.069 | 0.073 | 0.070 | -0.001 | -0.005 | 0.003  |
| 0.022 | 0.025 | 0.024 | -0.001 | -0.003 | 0.002  |
| 0.022 | 0.026 | 0.024 | -0.001 | -0.004 | 0.002  |
| 0.960 | 0.960 | 0.961 | -0.001 | 0.000  | -0.001 |
| 0.948 | 0.949 | 0.949 | -0.001 | -0.001 | 0.000  |
| 0.391 | 0.406 | 0.393 | -0.001 | -0.014 | 0.013  |
| 0.871 | 0.858 | 0.873 | -0.001 | 0.013  | -0.014 |
| 0.189 | 0.187 | 0.191 | -0.001 | 0.002  | -0.003 |
| 0.110 | 0.116 | 0.112 | -0.001 | -0.005 | 0.004  |
| 0.040 | 0.044 | 0.041 | -0.001 | -0.004 | 0.003  |
| 0.037 | 0.038 | 0.038 | -0.001 | -0.001 | 0.000  |
| 0.038 | 0.040 | 0.039 | -0.001 | -0.002 | 0.001  |
| 0.113 | 0.122 | 0.114 | -0.001 | -0.009 | 0.008  |
| 0.145 | 0.156 | 0.146 | -0.001 | -0.011 | 0.009  |
| 0.035 | 0.036 | 0.036 | -0.001 | -0.001 | 0.000  |
| 0.095 | 0.097 | 0.097 | -0.001 | -0.001 | 0.000  |
| 0.034 | 0.035 | 0.035 | -0.001 | 0.000  | -0.001 |
| 0.028 | 0.027 | 0.029 | -0.001 | 0.000  | -0.001 |
| 0.034 | 0.034 | 0.036 | -0.001 | 0.001  | -0.002 |
| 0.022 | 0.023 | 0.023 | -0.001 | -0.001 | 0.000  |
| 0.958 | 0.955 | 0.959 | -0.001 | 0.003  | -0.004 |
| 0.304 | 0.308 | 0.305 | -0.001 | -0.004 | 0.003  |
| 0.048 | 0.047 | 0.049 | -0.001 | 0.001  | -0.002 |
| 0.844 | 0.844 | 0.845 | -0.001 | 0.000  | -0.001 |
| 0.245 | 0.248 | 0.246 | -0.001 | -0.003 | 0.002  |
| 0.061 | 0.065 | 0.062 | -0.001 | -0.004 | 0.003  |
| 0.040 | 0.041 | 0.041 | -0.001 | -0.001 | 0.000  |
| 0.294 | 0.288 | 0.295 | -0.001 | 0.006  | -0.007 |
| 0.512 | 0.510 | 0.513 | -0.001 | 0.002  | -0.003 |
| 0.036 | 0.038 | 0.037 | -0.001 | -0.002 | 0.001  |
| 0.028 | 0.028 | 0.029 | -0.001 | -0.001 | 0.000  |
| 0.033 | 0.034 | 0.034 | -0.001 | -0.001 | 0.000  |
| 0.414 | 0.408 | 0.415 | -0.001 | 0.006  | -0.007 |
| 0.309 | 0.305 | 0.310 | -0.001 | 0.004  | -0.005 |
| 0.035 | 0.036 | 0.036 | -0.001 | -0.001 | 0.000  |
| 0.011 | 0.014 | 0.012 | -0.001 | -0.003 | 0.002  |
| 0.875 | 0.873 | 0.875 | -0.001 | 0.001  | -0.002 |
| 0.016 | 0.015 | 0.016 | -0.001 | 0.001  | -0.002 |
| 0.014 | 0.014 | 0.015 | -0.001 | 0.000  | -0.001 |
| 0.028 | 0.029 | 0.029 | -0.001 | -0.001 | 0.000  |
| 0.026 | 0.027 | 0.027 | -0.001 | -0.001 | 0.000  |

|       |       |       |        |        |        |
|-------|-------|-------|--------|--------|--------|
| 0.159 | 0.157 | 0.160 | -0.001 | 0.002  | -0.002 |
| 0.035 | 0.036 | 0.036 | -0.001 | -0.001 | 0.000  |
| 0.030 | 0.031 | 0.031 | -0.001 | -0.001 | 0.000  |
| 0.054 | 0.052 | 0.055 | -0.001 | 0.003  | -0.004 |
| 0.782 | 0.780 | 0.783 | -0.001 | 0.003  | -0.003 |
| 0.030 | 0.031 | 0.031 | -0.001 | 0.000  | 0.000  |
| 0.038 | 0.038 | 0.039 | -0.001 | 0.000  | -0.001 |
| 0.063 | 0.063 | 0.064 | -0.001 | 0.001  | -0.002 |
| 0.026 | 0.025 | 0.027 | -0.001 | 0.001  | -0.002 |
| 0.027 | 0.027 | 0.027 | -0.001 | 0.000  | -0.001 |
| 0.141 | 0.136 | 0.141 | -0.001 | 0.004  | -0.005 |
| 0.387 | 0.397 | 0.388 | -0.001 | -0.010 | 0.009  |
| 0.119 | 0.123 | 0.120 | -0.001 | -0.004 | 0.003  |
| 0.524 | 0.524 | 0.524 | -0.001 | -0.001 | 0.000  |
| 0.028 | 0.033 | 0.029 | -0.001 | -0.004 | 0.004  |
| 0.909 | 0.913 | 0.909 | -0.001 | -0.004 | 0.003  |
| 0.896 | 0.896 | 0.897 | -0.001 | 0.000  | 0.000  |
| 0.018 | 0.018 | 0.018 | -0.001 | 0.000  | 0.000  |
| 0.016 | 0.017 | 0.017 | -0.001 | -0.001 | 0.000  |
| 0.014 | 0.014 | 0.014 | 0.000  | -0.001 | 0.000  |
| 0.846 | 0.845 | 0.847 | 0.000  | 0.001  | -0.001 |
| 0.953 | 0.953 | 0.953 | 0.000  | 0.000  | -0.001 |
| 0.965 | 0.966 | 0.965 | 0.000  | -0.001 | 0.000  |
| 0.975 | 0.975 | 0.976 | 0.000  | 0.000  | -0.001 |
| 0.030 | 0.030 | 0.030 | 0.000  | -0.001 | 0.000  |
| 0.042 | 0.040 | 0.042 | 0.000  | 0.002  | -0.002 |
| 0.932 | 0.928 | 0.933 | 0.000  | 0.004  | -0.004 |
| 0.041 | 0.039 | 0.042 | 0.000  | 0.002  | -0.003 |
| 0.014 | 0.016 | 0.015 | 0.000  | -0.001 | 0.001  |
| 0.029 | 0.029 | 0.029 | 0.000  | 0.000  | 0.000  |
| 0.041 | 0.042 | 0.041 | 0.000  | -0.001 | 0.001  |
| 0.037 | 0.041 | 0.038 | 0.000  | -0.003 | 0.003  |
| 0.678 | 0.628 | 0.678 | 0.000  | 0.050  | -0.050 |
| 0.015 | 0.016 | 0.016 | 0.000  | 0.000  | 0.000  |
| 0.043 | 0.047 | 0.044 | 0.000  | -0.003 | 0.003  |
| 0.457 | 0.462 | 0.458 | 0.000  | -0.005 | 0.005  |
| 0.201 | 0.201 | 0.202 | 0.000  | 0.001  | -0.001 |
| 0.020 | 0.020 | 0.021 | 0.000  | 0.001  | -0.001 |
| 0.020 | 0.022 | 0.021 | 0.000  | -0.002 | 0.001  |
| 0.056 | 0.056 | 0.056 | 0.000  | 0.000  | 0.000  |
| 0.926 | 0.931 | 0.927 | 0.000  | -0.005 | 0.005  |
| 0.019 | 0.018 | 0.020 | 0.000  | 0.001  | -0.001 |
| 0.527 | 0.539 | 0.528 | 0.000  | -0.012 | 0.011  |
| 0.020 | 0.020 | 0.021 | 0.000  | 0.000  | 0.000  |
| 0.028 | 0.029 | 0.028 | 0.000  | 0.000  | 0.000  |

|       |       |       |       |        |        |
|-------|-------|-------|-------|--------|--------|
| 0.122 | 0.128 | 0.122 | 0.000 | -0.006 | 0.006  |
| 0.040 | 0.040 | 0.040 | 0.000 | 0.000  | -0.001 |
| 0.672 | 0.676 | 0.673 | 0.000 | -0.003 | 0.003  |
| 0.029 | 0.029 | 0.029 | 0.000 | 0.000  | 0.000  |
| 0.024 | 0.024 | 0.024 | 0.000 | 0.000  | 0.000  |
| 0.025 | 0.025 | 0.025 | 0.000 | 0.000  | 0.000  |
| 0.029 | 0.030 | 0.029 | 0.000 | -0.001 | 0.001  |
| 0.025 | 0.027 | 0.025 | 0.000 | -0.002 | 0.002  |
| 0.029 | 0.030 | 0.029 | 0.000 | -0.001 | 0.001  |
| 0.021 | 0.022 | 0.021 | 0.000 | -0.001 | 0.001  |
| 0.031 | 0.029 | 0.031 | 0.000 | 0.002  | -0.002 |
| 0.023 | 0.023 | 0.023 | 0.000 | 0.000  | 0.000  |
| 0.020 | 0.020 | 0.020 | 0.000 | 0.000  | 0.000  |
| 0.960 | 0.955 | 0.960 | 0.000 | 0.005  | -0.005 |
| 0.016 | 0.018 | 0.016 | 0.000 | -0.002 | 0.002  |
| 0.051 | 0.053 | 0.051 | 0.000 | -0.002 | 0.001  |
| 0.033 | 0.032 | 0.033 | 0.000 | 0.001  | -0.001 |
| 0.544 | 0.546 | 0.544 | 0.000 | -0.003 | 0.003  |
| 0.027 | 0.027 | 0.028 | 0.000 | 0.000  | 0.000  |
| 0.028 | 0.026 | 0.028 | 0.000 | 0.002  | -0.002 |
| 0.192 | 0.183 | 0.192 | 0.000 | 0.009  | -0.009 |
| 0.037 | 0.037 | 0.037 | 0.000 | 0.000  | 0.000  |
| 0.039 | 0.041 | 0.039 | 0.000 | -0.002 | 0.002  |
| 0.961 | 0.963 | 0.961 | 0.000 | -0.001 | 0.001  |
| 0.018 | 0.018 | 0.018 | 0.000 | 0.000  | 0.000  |
| 0.042 | 0.043 | 0.042 | 0.000 | -0.001 | 0.001  |
| 0.353 | 0.352 | 0.353 | 0.000 | 0.002  | -0.002 |
| 0.881 | 0.885 | 0.881 | 0.000 | -0.004 | 0.004  |
| 0.069 | 0.067 | 0.069 | 0.000 | 0.002  | -0.002 |
| 0.028 | 0.029 | 0.028 | 0.000 | 0.000  | 0.001  |
| 0.080 | 0.080 | 0.080 | 0.000 | 0.000  | 0.000  |
| 0.028 | 0.029 | 0.028 | 0.000 | -0.001 | 0.001  |
| 0.441 | 0.455 | 0.441 | 0.000 | -0.014 | 0.014  |
| 0.033 | 0.035 | 0.033 | 0.000 | -0.002 | 0.002  |
| 0.025 | 0.024 | 0.025 | 0.000 | 0.001  | -0.001 |
| 0.040 | 0.043 | 0.040 | 0.000 | -0.003 | 0.003  |
| 0.019 | 0.019 | 0.019 | 0.000 | 0.000  | 0.000  |
| 0.023 | 0.024 | 0.023 | 0.000 | 0.000  | 0.001  |
| 0.026 | 0.026 | 0.025 | 0.000 | -0.001 | 0.001  |
| 0.041 | 0.041 | 0.040 | 0.000 | -0.001 | 0.001  |
| 0.020 | 0.018 | 0.020 | 0.000 | 0.002  | -0.001 |
| 0.033 | 0.034 | 0.033 | 0.000 | -0.001 | 0.001  |
| 0.073 | 0.072 | 0.073 | 0.000 | 0.002  | -0.001 |
| 0.052 | 0.052 | 0.052 | 0.000 | 0.000  | 0.001  |
| 0.083 | 0.081 | 0.083 | 0.000 | 0.002  | -0.002 |

|       |       |       |       |        |        |
|-------|-------|-------|-------|--------|--------|
| 0.030 | 0.031 | 0.030 | 0.000 | -0.001 | 0.001  |
| 0.024 | 0.025 | 0.023 | 0.000 | -0.002 | 0.002  |
| 0.040 | 0.039 | 0.039 | 0.000 | 0.000  | 0.000  |
| 0.899 | 0.902 | 0.899 | 0.000 | -0.003 | 0.003  |
| 0.038 | 0.038 | 0.038 | 0.000 | 0.000  | 0.000  |
| 0.746 | 0.770 | 0.746 | 0.000 | -0.024 | 0.025  |
| 0.041 | 0.040 | 0.040 | 0.000 | 0.001  | 0.000  |
| 0.017 | 0.017 | 0.017 | 0.000 | 0.000  | 0.000  |
| 0.885 | 0.890 | 0.885 | 0.000 | -0.005 | 0.005  |
| 0.041 | 0.042 | 0.041 | 0.000 | -0.001 | 0.001  |
| 0.048 | 0.046 | 0.047 | 0.000 | 0.002  | -0.001 |
| 0.011 | 0.010 | 0.011 | 0.000 | 0.001  | 0.000  |
| 0.020 | 0.019 | 0.019 | 0.000 | 0.001  | -0.001 |
| 0.037 | 0.039 | 0.037 | 0.000 | -0.001 | 0.002  |
| 0.036 | 0.034 | 0.035 | 0.000 | 0.001  | -0.001 |
| 0.033 | 0.031 | 0.033 | 0.001 | 0.002  | -0.001 |
| 0.042 | 0.043 | 0.041 | 0.001 | -0.001 | 0.002  |
| 0.963 | 0.963 | 0.962 | 0.001 | -0.001 | 0.001  |
| 0.512 | 0.512 | 0.511 | 0.001 | 0.000  | 0.001  |
| 0.045 | 0.044 | 0.044 | 0.001 | 0.001  | 0.000  |
| 0.016 | 0.017 | 0.015 | 0.001 | -0.001 | 0.001  |
| 0.019 | 0.018 | 0.018 | 0.001 | 0.001  | 0.000  |
| 0.040 | 0.040 | 0.039 | 0.001 | 0.000  | 0.001  |
| 0.063 | 0.062 | 0.062 | 0.001 | 0.001  | 0.000  |
| 0.028 | 0.029 | 0.027 | 0.001 | -0.001 | 0.002  |
| 0.550 | 0.550 | 0.549 | 0.001 | 0.000  | 0.000  |
| 0.016 | 0.016 | 0.016 | 0.001 | 0.000  | 0.000  |
| 0.020 | 0.021 | 0.020 | 0.001 | 0.000  | 0.001  |
| 0.903 | 0.906 | 0.902 | 0.001 | -0.003 | 0.004  |
| 0.017 | 0.017 | 0.016 | 0.001 | 0.000  | 0.001  |
| 0.816 | 0.823 | 0.816 | 0.001 | -0.007 | 0.008  |
| 0.022 | 0.021 | 0.022 | 0.001 | 0.001  | 0.000  |
| 0.389 | 0.367 | 0.389 | 0.001 | 0.022  | -0.021 |
| 0.054 | 0.054 | 0.053 | 0.001 | 0.000  | 0.001  |
| 0.046 | 0.048 | 0.045 | 0.001 | -0.002 | 0.002  |
| 0.089 | 0.086 | 0.088 | 0.001 | 0.003  | -0.002 |
| 0.021 | 0.023 | 0.020 | 0.001 | -0.002 | 0.003  |
| 0.964 | 0.963 | 0.963 | 0.001 | 0.001  | 0.000  |
| 0.027 | 0.027 | 0.026 | 0.001 | 0.000  | 0.001  |
| 0.028 | 0.027 | 0.027 | 0.001 | 0.001  | -0.001 |
| 0.023 | 0.021 | 0.022 | 0.001 | 0.002  | -0.001 |
| 0.017 | 0.016 | 0.016 | 0.001 | 0.001  | 0.000  |
| 0.969 | 0.970 | 0.968 | 0.001 | 0.000  | 0.001  |
| 0.055 | 0.057 | 0.054 | 0.001 | -0.002 | 0.003  |
| 0.017 | 0.019 | 0.017 | 0.001 | -0.001 | 0.002  |

|       |       |       |       |        |        |
|-------|-------|-------|-------|--------|--------|
| 0.017 | 0.016 | 0.016 | 0.001 | 0.001  | 0.000  |
| 0.033 | 0.034 | 0.032 | 0.001 | -0.001 | 0.002  |
| 0.047 | 0.048 | 0.046 | 0.001 | -0.001 | 0.002  |
| 0.016 | 0.016 | 0.015 | 0.001 | 0.000  | 0.001  |
| 0.045 | 0.044 | 0.044 | 0.001 | 0.001  | 0.000  |
| 0.042 | 0.042 | 0.041 | 0.001 | -0.001 | 0.002  |
| 0.051 | 0.048 | 0.050 | 0.001 | 0.002  | -0.001 |
| 0.021 | 0.022 | 0.020 | 0.001 | -0.002 | 0.003  |
| 0.024 | 0.023 | 0.023 | 0.001 | 0.001  | 0.000  |
| 0.870 | 0.858 | 0.869 | 0.001 | 0.012  | -0.011 |
| 0.031 | 0.030 | 0.029 | 0.001 | 0.000  | 0.001  |
| 0.014 | 0.013 | 0.013 | 0.001 | 0.001  | 0.000  |
| 0.030 | 0.030 | 0.029 | 0.001 | -0.001 | 0.002  |
| 0.030 | 0.029 | 0.029 | 0.001 | 0.001  | 0.000  |
| 0.510 | 0.503 | 0.509 | 0.001 | 0.007  | -0.006 |
| 0.055 | 0.053 | 0.053 | 0.001 | 0.002  | -0.001 |
| 0.017 | 0.017 | 0.016 | 0.001 | 0.000  | 0.002  |
| 0.086 | 0.100 | 0.085 | 0.001 | -0.014 | 0.015  |
| 0.942 | 0.947 | 0.940 | 0.001 | -0.006 | 0.007  |
| 0.028 | 0.029 | 0.027 | 0.001 | 0.000  | 0.001  |
| 0.022 | 0.022 | 0.021 | 0.001 | 0.001  | 0.001  |
| 0.026 | 0.025 | 0.024 | 0.001 | 0.001  | 0.000  |
| 0.019 | 0.018 | 0.017 | 0.001 | 0.001  | 0.000  |
| 0.044 | 0.042 | 0.042 | 0.001 | 0.002  | 0.000  |
| 0.028 | 0.027 | 0.027 | 0.001 | 0.001  | 0.000  |
| 0.024 | 0.022 | 0.023 | 0.001 | 0.002  | -0.001 |
| 0.200 | 0.207 | 0.198 | 0.001 | -0.008 | 0.009  |
| 0.602 | 0.553 | 0.601 | 0.001 | 0.049  | -0.048 |
| 0.049 | 0.049 | 0.048 | 0.001 | 0.000  | 0.001  |
| 0.048 | 0.047 | 0.047 | 0.001 | 0.000  | 0.001  |
| 0.220 | 0.231 | 0.219 | 0.001 | -0.010 | 0.012  |
| 0.970 | 0.969 | 0.969 | 0.001 | 0.001  | 0.000  |
| 0.045 | 0.042 | 0.044 | 0.001 | 0.003  | -0.002 |
| 0.022 | 0.020 | 0.021 | 0.001 | 0.001  | 0.000  |
| 0.067 | 0.068 | 0.065 | 0.001 | -0.001 | 0.003  |
| 0.063 | 0.063 | 0.062 | 0.001 | 0.000  | 0.001  |
| 0.024 | 0.022 | 0.022 | 0.001 | 0.002  | 0.000  |
| 0.018 | 0.018 | 0.017 | 0.001 | 0.000  | 0.001  |
| 0.025 | 0.026 | 0.023 | 0.001 | -0.001 | 0.002  |
| 0.085 | 0.089 | 0.083 | 0.001 | -0.004 | 0.006  |
| 0.909 | 0.904 | 0.907 | 0.001 | 0.004  | -0.003 |
| 0.013 | 0.013 | 0.012 | 0.001 | 0.000  | 0.001  |
| 0.018 | 0.017 | 0.016 | 0.002 | 0.000  | 0.001  |
| 0.260 | 0.267 | 0.259 | 0.002 | -0.007 | 0.008  |
| 0.064 | 0.063 | 0.062 | 0.002 | 0.001  | 0.001  |



|       |       |       |       |        |        |
|-------|-------|-------|-------|--------|--------|
| 0.032 | 0.032 | 0.031 | 0.002 | 0.001  | 0.001  |
| 0.706 | 0.705 | 0.705 | 0.002 | 0.001  | 0.000  |
| 0.062 | 0.061 | 0.060 | 0.002 | 0.000  | 0.001  |
| 0.926 | 0.924 | 0.925 | 0.002 | 0.002  | -0.001 |
| 0.107 | 0.103 | 0.106 | 0.002 | 0.005  | -0.003 |
| 0.945 | 0.947 | 0.943 | 0.002 | -0.002 | 0.003  |
| 0.127 | 0.128 | 0.126 | 0.002 | -0.001 | 0.003  |
| 0.030 | 0.028 | 0.028 | 0.002 | 0.001  | 0.000  |
| 0.044 | 0.046 | 0.042 | 0.002 | -0.002 | 0.004  |
| 0.040 | 0.038 | 0.038 | 0.002 | 0.001  | 0.000  |
| 0.498 | 0.498 | 0.496 | 0.002 | 0.000  | 0.002  |
| 0.016 | 0.017 | 0.014 | 0.002 | -0.002 | 0.003  |
| 0.937 | 0.926 | 0.935 | 0.002 | 0.011  | -0.009 |
| 0.077 | 0.075 | 0.075 | 0.002 | 0.001  | 0.000  |
| 0.902 | 0.893 | 0.900 | 0.002 | 0.009  | -0.007 |
| 0.024 | 0.025 | 0.023 | 0.002 | -0.001 | 0.003  |
| 0.015 | 0.014 | 0.014 | 0.002 | 0.002  | 0.000  |
| 0.041 | 0.040 | 0.039 | 0.002 | 0.001  | 0.001  |
| 0.085 | 0.085 | 0.083 | 0.002 | 0.000  | 0.002  |
| 0.031 | 0.030 | 0.029 | 0.002 | 0.001  | 0.001  |
| 0.037 | 0.036 | 0.035 | 0.002 | 0.001  | 0.001  |
| 0.960 | 0.957 | 0.958 | 0.002 | 0.003  | -0.001 |
| 0.017 | 0.015 | 0.015 | 0.002 | 0.002  | 0.000  |
| 0.023 | 0.024 | 0.021 | 0.002 | -0.001 | 0.003  |
| 0.891 | 0.891 | 0.889 | 0.002 | 0.000  | 0.002  |
| 0.958 | 0.953 | 0.956 | 0.002 | 0.004  | -0.003 |
| 0.036 | 0.038 | 0.034 | 0.002 | -0.001 | 0.003  |
| 0.902 | 0.891 | 0.900 | 0.002 | 0.010  | -0.008 |
| 0.228 | 0.230 | 0.226 | 0.002 | -0.002 | 0.004  |
| 0.957 | 0.953 | 0.955 | 0.002 | 0.005  | -0.003 |
| 0.151 | 0.146 | 0.149 | 0.002 | 0.005  | -0.003 |
| 0.820 | 0.826 | 0.818 | 0.002 | -0.006 | 0.008  |
| 0.274 | 0.280 | 0.272 | 0.002 | -0.005 | 0.007  |
| 0.834 | 0.836 | 0.832 | 0.002 | -0.002 | 0.004  |
| 0.952 | 0.956 | 0.950 | 0.002 | -0.004 | 0.006  |
| 0.095 | 0.093 | 0.093 | 0.002 | 0.002  | 0.000  |
| 0.052 | 0.050 | 0.050 | 0.002 | 0.002  | 0.000  |
| 0.102 | 0.100 | 0.100 | 0.002 | 0.002  | 0.000  |
| 0.977 | 0.977 | 0.975 | 0.002 | 0.001  | 0.002  |
| 0.031 | 0.028 | 0.029 | 0.002 | 0.003  | -0.001 |
| 0.958 | 0.956 | 0.956 | 0.002 | 0.002  | 0.001  |
| 0.477 | 0.474 | 0.475 | 0.002 | 0.003  | 0.000  |
| 0.571 | 0.562 | 0.569 | 0.002 | 0.010  | -0.007 |
| 0.020 | 0.020 | 0.018 | 0.002 | 0.000  | 0.002  |
| 0.029 | 0.028 | 0.026 | 0.002 | 0.001  | 0.002  |

|       |       |       |       |        |        |
|-------|-------|-------|-------|--------|--------|
| 0.045 | 0.048 | 0.043 | 0.002 | -0.003 | 0.005  |
| 0.968 | 0.966 | 0.966 | 0.002 | 0.002  | 0.000  |
| 0.107 | 0.113 | 0.105 | 0.002 | -0.006 | 0.009  |
| 0.039 | 0.039 | 0.037 | 0.002 | 0.001  | 0.002  |
| 0.984 | 0.981 | 0.981 | 0.002 | 0.003  | -0.001 |
| 0.014 | 0.013 | 0.012 | 0.002 | 0.001  | 0.001  |
| 0.033 | 0.031 | 0.031 | 0.002 | 0.002  | 0.000  |
| 0.033 | 0.034 | 0.031 | 0.002 | 0.000  | 0.003  |
| 0.336 | 0.339 | 0.333 | 0.002 | -0.003 | 0.006  |
| 0.981 | 0.980 | 0.979 | 0.002 | 0.001  | 0.001  |
| 0.297 | 0.291 | 0.295 | 0.002 | 0.006  | -0.003 |
| 0.589 | 0.582 | 0.586 | 0.002 | 0.007  | -0.005 |
| 0.635 | 0.635 | 0.632 | 0.002 | 0.000  | 0.003  |
| 0.024 | 0.024 | 0.021 | 0.002 | 0.000  | 0.003  |
| 0.119 | 0.113 | 0.117 | 0.003 | 0.006  | -0.003 |
| 0.029 | 0.027 | 0.026 | 0.003 | 0.002  | 0.001  |
| 0.092 | 0.091 | 0.090 | 0.003 | 0.001  | 0.001  |
| 0.053 | 0.051 | 0.050 | 0.003 | 0.002  | 0.001  |
| 0.032 | 0.032 | 0.030 | 0.003 | 0.000  | 0.003  |
| 0.042 | 0.043 | 0.040 | 0.003 | 0.000  | 0.003  |
| 0.033 | 0.029 | 0.031 | 0.003 | 0.005  | -0.002 |
| 0.212 | 0.199 | 0.210 | 0.003 | 0.014  | -0.011 |
| 0.907 | 0.901 | 0.905 | 0.003 | 0.006  | -0.004 |
| 0.030 | 0.030 | 0.027 | 0.003 | 0.000  | 0.002  |
| 0.076 | 0.075 | 0.073 | 0.003 | 0.001  | 0.001  |
| 0.369 | 0.373 | 0.367 | 0.003 | -0.004 | 0.006  |
| 0.212 | 0.203 | 0.209 | 0.003 | 0.008  | -0.005 |
| 0.368 | 0.365 | 0.365 | 0.003 | 0.003  | 0.000  |
| 0.110 | 0.110 | 0.107 | 0.003 | 0.000  | 0.003  |
| 0.030 | 0.036 | 0.027 | 0.003 | -0.007 | 0.009  |
| 0.041 | 0.038 | 0.038 | 0.003 | 0.003  | 0.000  |
| 0.026 | 0.021 | 0.023 | 0.003 | 0.005  | -0.002 |
| 0.037 | 0.035 | 0.034 | 0.003 | 0.002  | 0.001  |
| 0.084 | 0.082 | 0.081 | 0.003 | 0.002  | 0.000  |
| 0.035 | 0.034 | 0.032 | 0.003 | 0.001  | 0.002  |
| 0.022 | 0.020 | 0.020 | 0.003 | 0.002  | 0.001  |
| 0.093 | 0.087 | 0.090 | 0.003 | 0.006  | -0.003 |
| 0.118 | 0.114 | 0.115 | 0.003 | 0.004  | -0.001 |
| 0.946 | 0.945 | 0.943 | 0.003 | 0.001  | 0.002  |
| 0.048 | 0.050 | 0.045 | 0.003 | -0.002 | 0.005  |
| 0.182 | 0.182 | 0.179 | 0.003 | 0.000  | 0.003  |
| 0.036 | 0.036 | 0.033 | 0.003 | 0.000  | 0.003  |
| 0.033 | 0.032 | 0.030 | 0.003 | 0.001  | 0.002  |
| 0.253 | 0.257 | 0.250 | 0.003 | -0.004 | 0.007  |
| 0.055 | 0.055 | 0.052 | 0.003 | 0.000  | 0.003  |

|       |       |       |       |        |        |
|-------|-------|-------|-------|--------|--------|
| 0.601 | 0.596 | 0.598 | 0.003 | 0.005  | -0.002 |
| 0.032 | 0.032 | 0.029 | 0.003 | 0.000  | 0.003  |
| 0.215 | 0.212 | 0.211 | 0.003 | 0.002  | 0.001  |
| 0.920 | 0.915 | 0.917 | 0.003 | 0.005  | -0.002 |
| 0.051 | 0.049 | 0.048 | 0.003 | 0.002  | 0.001  |
| 0.050 | 0.043 | 0.046 | 0.003 | 0.007  | -0.003 |
| 0.021 | 0.018 | 0.017 | 0.003 | 0.002  | 0.001  |
| 0.031 | 0.032 | 0.028 | 0.003 | 0.000  | 0.004  |
| 0.048 | 0.048 | 0.045 | 0.003 | 0.000  | 0.003  |
| 0.042 | 0.042 | 0.038 | 0.003 | 0.000  | 0.003  |
| 0.028 | 0.027 | 0.024 | 0.003 | 0.001  | 0.002  |
| 0.932 | 0.929 | 0.928 | 0.004 | 0.003  | 0.000  |
| 0.039 | 0.040 | 0.036 | 0.004 | -0.001 | 0.005  |
| 0.949 | 0.945 | 0.945 | 0.004 | 0.003  | 0.000  |
| 0.289 | 0.292 | 0.286 | 0.004 | -0.003 | 0.007  |
| 0.853 | 0.851 | 0.850 | 0.004 | 0.002  | 0.001  |
| 0.105 | 0.116 | 0.102 | 0.004 | -0.011 | 0.015  |
| 0.034 | 0.033 | 0.030 | 0.004 | 0.001  | 0.003  |
| 0.588 | 0.573 | 0.584 | 0.004 | 0.015  | -0.011 |
| 0.021 | 0.020 | 0.018 | 0.004 | 0.001  | 0.003  |
| 0.894 | 0.889 | 0.890 | 0.004 | 0.004  | 0.000  |
| 0.027 | 0.025 | 0.023 | 0.004 | 0.002  | 0.002  |
| 0.032 | 0.030 | 0.028 | 0.004 | 0.002  | 0.002  |
| 0.179 | 0.179 | 0.175 | 0.004 | 0.000  | 0.004  |
| 0.044 | 0.042 | 0.040 | 0.004 | 0.002  | 0.002  |
| 0.033 | 0.032 | 0.029 | 0.004 | 0.002  | 0.002  |
| 0.060 | 0.061 | 0.056 | 0.004 | -0.001 | 0.005  |
| 0.049 | 0.048 | 0.045 | 0.004 | 0.001  | 0.003  |
| 0.084 | 0.080 | 0.080 | 0.004 | 0.004  | 0.000  |
| 0.616 | 0.620 | 0.612 | 0.004 | -0.004 | 0.009  |
| 0.685 | 0.683 | 0.681 | 0.004 | 0.003  | 0.001  |
| 0.233 | 0.235 | 0.229 | 0.004 | -0.002 | 0.006  |
| 0.515 | 0.514 | 0.511 | 0.004 | 0.001  | 0.003  |
| 0.030 | 0.028 | 0.026 | 0.004 | 0.002  | 0.002  |
| 0.301 | 0.296 | 0.296 | 0.004 | 0.004  | 0.000  |
| 0.192 | 0.185 | 0.188 | 0.004 | 0.007  | -0.003 |
| 0.135 | 0.127 | 0.131 | 0.004 | 0.008  | -0.004 |
| 0.405 | 0.401 | 0.400 | 0.004 | 0.004  | 0.000  |
| 0.132 | 0.140 | 0.127 | 0.004 | -0.009 | 0.013  |
| 0.026 | 0.025 | 0.021 | 0.004 | 0.001  | 0.003  |
| 0.045 | 0.043 | 0.041 | 0.004 | 0.002  | 0.002  |
| 0.046 | 0.045 | 0.042 | 0.004 | 0.001  | 0.004  |
| 0.918 | 0.916 | 0.914 | 0.004 | 0.002  | 0.002  |
| 0.059 | 0.056 | 0.054 | 0.005 | 0.002  | 0.002  |
| 0.350 | 0.353 | 0.345 | 0.005 | -0.003 | 0.008  |

|       |       |       |       |        |        |
|-------|-------|-------|-------|--------|--------|
| 0.362 | 0.361 | 0.358 | 0.005 | 0.001  | 0.004  |
| 0.532 | 0.531 | 0.527 | 0.005 | 0.001  | 0.004  |
| 0.924 | 0.921 | 0.919 | 0.005 | 0.003  | 0.002  |
| 0.637 | 0.635 | 0.632 | 0.005 | 0.003  | 0.002  |
| 0.147 | 0.148 | 0.142 | 0.005 | 0.000  | 0.005  |
| 0.933 | 0.927 | 0.928 | 0.005 | 0.005  | 0.000  |
| 0.075 | 0.073 | 0.069 | 0.005 | 0.001  | 0.004  |
| 0.066 | 0.063 | 0.061 | 0.005 | 0.003  | 0.002  |
| 0.043 | 0.042 | 0.038 | 0.005 | 0.001  | 0.004  |
| 0.943 | 0.939 | 0.938 | 0.005 | 0.004  | 0.001  |
| 0.023 | 0.022 | 0.017 | 0.005 | 0.000  | 0.005  |
| 0.213 | 0.227 | 0.207 | 0.005 | -0.014 | 0.019  |
| 0.057 | 0.057 | 0.052 | 0.005 | 0.000  | 0.006  |
| 0.108 | 0.105 | 0.103 | 0.005 | 0.003  | 0.002  |
| 0.488 | 0.466 | 0.483 | 0.005 | 0.022  | -0.017 |
| 0.826 | 0.836 | 0.821 | 0.005 | -0.009 | 0.015  |
| 0.113 | 0.108 | 0.107 | 0.005 | 0.005  | 0.000  |
| 0.277 | 0.273 | 0.271 | 0.006 | 0.004  | 0.002  |
| 0.042 | 0.041 | 0.037 | 0.006 | 0.002  | 0.004  |
| 0.060 | 0.062 | 0.055 | 0.006 | -0.002 | 0.008  |
| 0.051 | 0.046 | 0.045 | 0.006 | 0.005  | 0.000  |
| 0.343 | 0.315 | 0.337 | 0.006 | 0.028  | -0.022 |
| 0.708 | 0.698 | 0.702 | 0.006 | 0.010  | -0.005 |
| 0.711 | 0.698 | 0.705 | 0.006 | 0.012  | -0.006 |
| 0.267 | 0.257 | 0.261 | 0.006 | 0.010  | -0.004 |
| 0.054 | 0.053 | 0.048 | 0.006 | 0.001  | 0.005  |
| 0.029 | 0.026 | 0.023 | 0.006 | 0.003  | 0.003  |
| 0.911 | 0.896 | 0.905 | 0.006 | 0.016  | -0.010 |
| 0.042 | 0.039 | 0.036 | 0.006 | 0.002  | 0.004  |
| 0.932 | 0.924 | 0.926 | 0.006 | 0.008  | -0.001 |
| 0.918 | 0.913 | 0.912 | 0.006 | 0.005  | 0.001  |
| 0.061 | 0.058 | 0.055 | 0.006 | 0.003  | 0.003  |
| 0.102 | 0.097 | 0.096 | 0.006 | 0.005  | 0.001  |
| 0.923 | 0.915 | 0.917 | 0.006 | 0.008  | -0.002 |
| 0.188 | 0.196 | 0.182 | 0.006 | -0.007 | 0.014  |
| 0.432 | 0.432 | 0.425 | 0.006 | 0.000  | 0.007  |
| 0.067 | 0.058 | 0.061 | 0.007 | 0.009  | -0.003 |
| 0.077 | 0.073 | 0.070 | 0.007 | 0.004  | 0.003  |
| 0.083 | 0.079 | 0.077 | 0.007 | 0.004  | 0.003  |
| 0.046 | 0.044 | 0.039 | 0.007 | 0.001  | 0.006  |
| 0.068 | 0.064 | 0.061 | 0.007 | 0.004  | 0.003  |
| 0.040 | 0.029 | 0.033 | 0.007 | 0.011  | -0.004 |
| 0.870 | 0.865 | 0.864 | 0.007 | 0.005  | 0.002  |
| 0.724 | 0.715 | 0.717 | 0.007 | 0.009  | -0.002 |
| 0.434 | 0.433 | 0.427 | 0.007 | 0.001  | 0.006  |

|       |       |       |       |        |        |
|-------|-------|-------|-------|--------|--------|
| 0.076 | 0.070 | 0.069 | 0.007 | 0.006  | 0.001  |
| 0.581 | 0.568 | 0.574 | 0.007 | 0.013  | -0.006 |
| 0.089 | 0.088 | 0.082 | 0.007 | 0.001  | 0.006  |
| 0.601 | 0.596 | 0.594 | 0.007 | 0.005  | 0.002  |
| 0.099 | 0.095 | 0.091 | 0.007 | 0.003  | 0.004  |
| 0.868 | 0.851 | 0.861 | 0.007 | 0.017  | -0.009 |
| 0.719 | 0.716 | 0.712 | 0.007 | 0.003  | 0.005  |
| 0.037 | 0.033 | 0.030 | 0.007 | 0.004  | 0.004  |
| 0.052 | 0.050 | 0.045 | 0.007 | 0.003  | 0.005  |
| 0.347 | 0.326 | 0.339 | 0.007 | 0.021  | -0.014 |
| 0.035 | 0.032 | 0.027 | 0.007 | 0.003  | 0.005  |
| 0.072 | 0.068 | 0.065 | 0.007 | 0.004  | 0.003  |
| 0.531 | 0.522 | 0.524 | 0.007 | 0.009  | -0.002 |
| 0.777 | 0.776 | 0.769 | 0.007 | 0.001  | 0.006  |
| 0.884 | 0.899 | 0.877 | 0.008 | -0.015 | 0.022  |
| 0.041 | 0.036 | 0.033 | 0.008 | 0.005  | 0.003  |
| 0.896 | 0.889 | 0.888 | 0.008 | 0.006  | 0.001  |
| 0.541 | 0.532 | 0.533 | 0.008 | 0.009  | -0.001 |
| 0.077 | 0.083 | 0.069 | 0.008 | -0.006 | 0.015  |
| 0.104 | 0.099 | 0.096 | 0.008 | 0.005  | 0.004  |
| 0.678 | 0.650 | 0.670 | 0.008 | 0.028  | -0.020 |
| 0.565 | 0.569 | 0.556 | 0.008 | -0.004 | 0.012  |
| 0.038 | 0.035 | 0.030 | 0.008 | 0.004  | 0.005  |
| 0.055 | 0.044 | 0.047 | 0.009 | 0.012  | -0.003 |
| 0.067 | 0.062 | 0.059 | 0.009 | 0.005  | 0.003  |
| 0.222 | 0.217 | 0.213 | 0.009 | 0.004  | 0.004  |
| 0.313 | 0.309 | 0.304 | 0.009 | 0.004  | 0.004  |
| 0.717 | 0.713 | 0.708 | 0.009 | 0.004  | 0.005  |
| 0.371 | 0.367 | 0.362 | 0.009 | 0.004  | 0.005  |
| 0.558 | 0.552 | 0.549 | 0.009 | 0.006  | 0.003  |
| 0.145 | 0.140 | 0.136 | 0.009 | 0.005  | 0.004  |
| 0.855 | 0.854 | 0.846 | 0.009 | 0.001  | 0.008  |
| 0.769 | 0.765 | 0.760 | 0.009 | 0.004  | 0.005  |
| 0.886 | 0.876 | 0.877 | 0.009 | 0.010  | -0.001 |
| 0.931 | 0.921 | 0.921 | 0.009 | 0.009  | 0.000  |
| 0.082 | 0.084 | 0.073 | 0.009 | -0.002 | 0.011  |
| 0.067 | 0.072 | 0.058 | 0.009 | -0.004 | 0.014  |
| 0.390 | 0.384 | 0.381 | 0.009 | 0.006  | 0.003  |
| 0.110 | 0.103 | 0.101 | 0.009 | 0.007  | 0.002  |
| 0.123 | 0.125 | 0.113 | 0.010 | -0.003 | 0.012  |
| 0.863 | 0.860 | 0.853 | 0.010 | 0.003  | 0.007  |
| 0.808 | 0.806 | 0.798 | 0.010 | 0.003  | 0.008  |
| 0.526 | 0.529 | 0.516 | 0.010 | -0.003 | 0.013  |
| 0.620 | 0.615 | 0.610 | 0.010 | 0.005  | 0.005  |
| 0.218 | 0.223 | 0.207 | 0.011 | -0.005 | 0.016  |

|       |       |       |       |        |        |
|-------|-------|-------|-------|--------|--------|
| 0.420 | 0.414 | 0.409 | 0.011 | 0.005  | 0.005  |
| 0.122 | 0.112 | 0.111 | 0.011 | 0.010  | 0.000  |
| 0.810 | 0.783 | 0.799 | 0.011 | 0.027  | -0.016 |
| 0.257 | 0.259 | 0.246 | 0.011 | -0.002 | 0.013  |
| 0.892 | 0.890 | 0.881 | 0.011 | 0.002  | 0.009  |
| 0.710 | 0.708 | 0.699 | 0.011 | 0.001  | 0.009  |
| 0.750 | 0.743 | 0.739 | 0.011 | 0.007  | 0.004  |
| 0.600 | 0.590 | 0.589 | 0.011 | 0.011  | 0.000  |
| 0.812 | 0.780 | 0.801 | 0.011 | 0.033  | -0.022 |
| 0.167 | 0.159 | 0.156 | 0.011 | 0.008  | 0.003  |
| 0.855 | 0.855 | 0.843 | 0.011 | -0.001 | 0.012  |
| 0.079 | 0.086 | 0.068 | 0.011 | -0.006 | 0.018  |
| 0.135 | 0.134 | 0.123 | 0.011 | 0.001  | 0.010  |
| 0.893 | 0.882 | 0.881 | 0.012 | 0.011  | 0.000  |
| 0.551 | 0.550 | 0.539 | 0.012 | 0.001  | 0.011  |
| 0.532 | 0.539 | 0.520 | 0.012 | -0.007 | 0.019  |
| 0.205 | 0.207 | 0.193 | 0.012 | -0.003 | 0.015  |
| 0.308 | 0.297 | 0.296 | 0.012 | 0.011  | 0.001  |
| 0.235 | 0.233 | 0.223 | 0.012 | 0.002  | 0.010  |
| 0.910 | 0.905 | 0.898 | 0.012 | 0.005  | 0.007  |
| 0.559 | 0.551 | 0.546 | 0.013 | 0.008  | 0.005  |
| 0.747 | 0.746 | 0.734 | 0.013 | 0.001  | 0.012  |
| 0.398 | 0.406 | 0.385 | 0.013 | -0.008 | 0.021  |
| 0.746 | 0.724 | 0.733 | 0.013 | 0.022  | -0.009 |
| 0.836 | 0.823 | 0.822 | 0.013 | 0.013  | 0.001  |
| 0.299 | 0.297 | 0.285 | 0.014 | 0.002  | 0.012  |
| 0.657 | 0.665 | 0.643 | 0.014 | -0.008 | 0.022  |
| 0.863 | 0.856 | 0.850 | 0.014 | 0.008  | 0.006  |
| 0.237 | 0.230 | 0.223 | 0.014 | 0.007  | 0.007  |
| 0.126 | 0.121 | 0.112 | 0.014 | 0.005  | 0.009  |
| 0.216 | 0.221 | 0.202 | 0.014 | -0.005 | 0.019  |
| 0.299 | 0.298 | 0.285 | 0.014 | 0.001  | 0.013  |
| 0.214 | 0.208 | 0.199 | 0.015 | 0.006  | 0.009  |
| 0.766 | 0.753 | 0.751 | 0.015 | 0.013  | 0.002  |
| 0.671 | 0.662 | 0.656 | 0.015 | 0.009  | 0.006  |
| 0.615 | 0.612 | 0.600 | 0.015 | 0.003  | 0.012  |
| 0.629 | 0.627 | 0.614 | 0.015 | 0.002  | 0.013  |
| 0.525 | 0.513 | 0.510 | 0.015 | 0.012  | 0.003  |
| 0.607 | 0.592 | 0.592 | 0.015 | 0.015  | 0.000  |
| 0.267 | 0.253 | 0.252 | 0.016 | 0.014  | 0.001  |
| 0.446 | 0.446 | 0.430 | 0.016 | 0.000  | 0.016  |
| 0.444 | 0.433 | 0.429 | 0.016 | 0.011  | 0.005  |
| 0.528 | 0.533 | 0.512 | 0.016 | -0.004 | 0.020  |
| 0.133 | 0.126 | 0.117 | 0.016 | 0.007  | 0.009  |
| 0.145 | 0.143 | 0.129 | 0.016 | 0.001  | 0.015  |

|       |       |       |       |        |        |
|-------|-------|-------|-------|--------|--------|
| 0.331 | 0.318 | 0.315 | 0.016 | 0.013  | 0.003  |
| 0.250 | 0.239 | 0.234 | 0.017 | 0.011  | 0.005  |
| 0.413 | 0.399 | 0.396 | 0.017 | 0.014  | 0.003  |
| 0.460 | 0.461 | 0.443 | 0.017 | -0.001 | 0.018  |
| 0.545 | 0.548 | 0.528 | 0.017 | -0.003 | 0.019  |
| 0.648 | 0.643 | 0.631 | 0.017 | 0.005  | 0.012  |
| 0.828 | 0.808 | 0.811 | 0.018 | 0.021  | -0.003 |
| 0.657 | 0.656 | 0.639 | 0.018 | 0.001  | 0.016  |
| 0.426 | 0.431 | 0.408 | 0.018 | -0.005 | 0.023  |
| 0.793 | 0.775 | 0.775 | 0.018 | 0.018  | 0.000  |
| 0.400 | 0.395 | 0.382 | 0.018 | 0.005  | 0.013  |
| 0.684 | 0.687 | 0.665 | 0.019 | -0.004 | 0.022  |
| 0.643 | 0.638 | 0.624 | 0.019 | 0.005  | 0.014  |
| 0.170 | 0.156 | 0.150 | 0.019 | 0.014  | 0.005  |
| 0.565 | 0.559 | 0.546 | 0.019 | 0.006  | 0.014  |
| 0.232 | 0.219 | 0.212 | 0.020 | 0.012  | 0.007  |
| 0.358 | 0.335 | 0.338 | 0.020 | 0.023  | -0.003 |
| 0.406 | 0.398 | 0.386 | 0.020 | 0.007  | 0.013  |
| 0.425 | 0.420 | 0.405 | 0.020 | 0.005  | 0.015  |
| 0.229 | 0.213 | 0.208 | 0.021 | 0.016  | 0.005  |
| 0.648 | 0.646 | 0.626 | 0.021 | 0.002  | 0.019  |
| 0.890 | 0.873 | 0.869 | 0.022 | 0.018  | 0.004  |
| 0.472 | 0.459 | 0.450 | 0.022 | 0.013  | 0.009  |
| 0.214 | 0.205 | 0.191 | 0.022 | 0.008  | 0.014  |
| 0.252 | 0.248 | 0.230 | 0.023 | 0.005  | 0.018  |
| 0.568 | 0.547 | 0.546 | 0.023 | 0.021  | 0.001  |
| 0.373 | 0.368 | 0.350 | 0.023 | 0.005  | 0.018  |
| 0.702 | 0.702 | 0.678 | 0.024 | 0.000  | 0.024  |
| 0.487 | 0.485 | 0.463 | 0.024 | 0.002  | 0.022  |
| 0.271 | 0.259 | 0.247 | 0.024 | 0.012  | 0.012  |
| 0.237 | 0.233 | 0.213 | 0.024 | 0.004  | 0.020  |
| 0.875 | 0.878 | 0.850 | 0.024 | -0.003 | 0.028  |
| 0.389 | 0.355 | 0.365 | 0.025 | 0.034  | -0.010 |
| 0.529 | 0.516 | 0.504 | 0.025 | 0.013  | 0.012  |
| 0.517 | 0.502 | 0.491 | 0.026 | 0.015  | 0.012  |
| 0.432 | 0.406 | 0.405 | 0.027 | 0.026  | 0.000  |
| 0.489 | 0.462 | 0.462 | 0.027 | 0.026  | 0.000  |
| 0.279 | 0.266 | 0.251 | 0.027 | 0.013  | 0.014  |
| 0.341 | 0.304 | 0.314 | 0.027 | 0.037  | -0.010 |
| 0.350 | 0.339 | 0.323 | 0.027 | 0.011  | 0.016  |
| 0.307 | 0.294 | 0.279 | 0.028 | 0.013  | 0.015  |
| 0.491 | 0.474 | 0.463 | 0.029 | 0.018  | 0.011  |
| 0.206 | 0.174 | 0.177 | 0.029 | 0.032  | -0.004 |
| 0.311 | 0.297 | 0.282 | 0.029 | 0.014  | 0.015  |
| 0.347 | 0.332 | 0.316 | 0.030 | 0.015  | 0.016  |

|              |              |              |       |        |        |
|--------------|--------------|--------------|-------|--------|--------|
| <b>0.229</b> | <b>0.193</b> | <b>0.197</b> | 0.032 | 0.036  | -0.004 |
| <b>0.376</b> | <b>0.350</b> | <b>0.344</b> | 0.032 | 0.025  | 0.007  |
| <b>0.837</b> | <b>0.838</b> | <b>0.805</b> | 0.032 | -0.001 | 0.033  |
| <b>0.425</b> | <b>0.407</b> | <b>0.391</b> | 0.034 | 0.018  | 0.016  |
| <b>0.418</b> | <b>0.392</b> | <b>0.383</b> | 0.035 | 0.026  | 0.009  |
| <b>0.408</b> | <b>0.392</b> | <b>0.373</b> | 0.036 | 0.016  | 0.019  |
| <b>0.376</b> | <b>0.353</b> | <b>0.339</b> | 0.036 | 0.023  | 0.014  |
| <b>0.369</b> | <b>0.340</b> | <b>0.332</b> | 0.037 | 0.029  | 0.008  |
| <b>0.322</b> | <b>0.310</b> | <b>0.284</b> | 0.038 | 0.012  | 0.026  |
| <b>0.476</b> | <b>0.441</b> | <b>0.437</b> | 0.039 | 0.034  | 0.004  |
| <b>0.432</b> | <b>0.412</b> | <b>0.392</b> | 0.039 | 0.020  | 0.020  |
| <b>0.640</b> | <b>0.622</b> | <b>0.601</b> | 0.039 | 0.018  | 0.021  |
| <b>0.299</b> | <b>0.282</b> | <b>0.256</b> | 0.043 | 0.017  | 0.026  |















































DNA methylation signatures link prenatal famine exposure to growth and metabolism. Tobi, P  
<http://www.ncbi.nlm.nih.gov/pubmed/25424739>

|       |            | CHR | MAPINFO  | Probe_SNPs | UCSC_RefGene | UCSC_RefGene    |
|-------|------------|-----|----------|------------|--------------|-----------------|
| SMAD7 | cg14785810 | 18  | 44676983 |            | HDHD2        | TSS200          |
| SMAD7 | cg18936800 | 18  | 44676962 |            | HDHD2        | TSS200          |
| SMAD7 | cg20581250 | 18  | 44676959 |            | HDHD2        | TSS200          |
| SMAD7 | cg05830870 | 18  | 44677236 |            | HDHD2        | TSS1500         |
| SMAD7 | cg05848120 | 18  | 44676992 |            | HDHD2        | TSS200          |
| SMAD7 | cg12344490 | 18  | 44677139 |            | HDHD2        | TSS1500         |
| SMAD7 | cg17192377 | 18  | 44677553 |            | HDHD2        | TSS1500         |
| KLF13 | cg11166299 | 15  | 29424391 |            | FAM189A1     | Body            |
| KLF13 | cg17051704 | 15  | 29424197 | rs7162625  | FAM189A1     | Body            |
| KLF13 | cg16264249 | 15  | 29424512 |            | FAM189A1     | Body            |
| RFTN1 | cg00822591 | 3   | 16306489 | rs2271078  | DPH3;OXNAD1  | 5'UTR;TSS1500   |
| RFTN1 | cg13262419 | 3   | 16306634 |            | OXNAD1;DPH3  | TSS200;TSS200   |
| RFTN1 | cg13470477 | 3   | 16306636 |            | OXNAD1;DPH3  | TSS200;TSS200   |
| RFTN1 | cg14877820 | 3   | 16306698 |            | OXNAD1;DPH3  | TSS200;TSS1500  |
| RFTN1 | cg19424343 | 3   | 16306684 |            | OXNAD1;DPH3  | TSS200;TSS200   |
| RFTN1 | cg20846042 | 3   | 16306509 | rs2271078  | OXNAD1;DPH3  | TSS1500;TSS1500 |
| RFTN1 | cg23474789 | 3   | 16306055 |            | DPH3;OXNAD1  | Body;TSS1500    |
| RFTN1 | cg23969669 | 3   | 16306450 |            | DPH3;OXNAD1  | 5'UTR;TSS1500   |
| RFTN1 | cg25096193 | 3   | 16306690 |            | OXNAD1;DPH3  | TSS200;TSS200   |
| RFTN1 | cg00203037 | 3   | 16360321 | rs689716   | RFTN1        | Body            |
| RFTN1 | cg00641792 | 3   | 16306543 |            | OXNAD1;DPH3  | TSS200;TSS200   |
| RFTN1 | cg01133779 | 3   | 16371295 |            | RFTN1        | Body            |
| RFTN1 | cg01798391 | 3   | 16306595 |            | OXNAD1;DPH3  | TSS200;TSS200   |
| RFTN1 | cg02255107 | 3   | 16347334 |            | OXNAD1       | 3'UTR           |
| RFTN1 | cg08523978 | 3   | 16394492 |            | RFTN1        | Body            |
| RFTN1 | cg10579246 | 3   | 16305290 |            | DPH3;OXNAD1  | Body;TSS1500    |
| RFTN1 | cg10895687 | 3   | 16289098 |            |              |                 |
| RFTN1 | cg11208165 | 3   | 16308357 |            | OXNAD1       | 5'UTR           |
| RFTN1 | cg12172478 | 3   | 16357591 | rs79146591 | RFTN1        | 3'UTR           |
| RFTN1 | cg13026795 | 3   | 16379963 |            | RFTN1        | Body            |
| RFTN1 | cg13601096 | 3   | 16303382 |            | DPH3;DPH3    | Body;Body       |
| RFTN1 | cg16456087 | 3   | 16343197 |            | OXNAD1       | Body            |
| RFTN1 | cg17886536 | 3   | 16320218 |            | OXNAD1       | Body            |
| RFTN1 | cg18276599 | 3   | 16393023 | rs78610660 | RFTN1        | Body            |
| RFTN1 | cg21761922 | 3   | 16309088 |            | OXNAD1       | 5'UTR           |
| RFTN1 | cg22230912 | 3   | 16331335 |            | OXNAD1       | Body            |
| RFTN1 | cg22688260 | 3   | 16306809 |            | OXNAD1;DPH3  | 1stExon;TSS1500 |
| RFTN1 | cg25809215 | 3   | 16306823 |            | OXNAD1;DPH3  | 1stExon;TSS1500 |

RFTN1 ch.3.373140f 3 16361589 rs79063464 RFTN1 Body

CDH23 no informative data

INSR no informative data

KLF13 no informative data

CPT1A no informative data

**Dutch Winter Hunger – Tobi, IJE 2015** <http://ije.oxfordjournals.org/content/early/2015/05/>

|            | <b>CHR</b> | <b>MAPINFO</b> | <b>Probe_SNP</b> | <b>UCSC_RefG</b> | <b>UCSC_RefG</b> |
|------------|------------|----------------|------------------|------------------|------------------|
| cg20823026 | chr2       | 366113         | rs6548229        |                  |                  |
| cg11496778 | chr11      | 3225076        | NA               |                  |                  |
| cg10354880 | chr12      | 46737123       | NA               |                  |                  |
| cg27370573 | chr19      | 292167         | NA               | PPAP2C;PPA       | TSS1500;TSS:     |

|            | <b>CHR</b> | <b>MAPINFO</b> | <b>Probe_SNP</b> | <b>UCSC_RefG</b> | <b>UCSC_RefG</b> |
|------------|------------|----------------|------------------|------------------|------------------|
| cg15659713 | chr8       | 38586183       | NA               | TACC1;TACC1      | 1stExon;5'UT     |
| cg26199857 | chr12      | 54764265       | NA               | ZNF385A;ZNF      | Body;Body;B      |

|   | <b>CHR</b> | <b>MAPINFO</b> | <b>Probe_SNP</b> | <b>UCSC_RefG</b> | <b>UCSC_RefG</b> |
|---|------------|----------------|------------------|------------------|------------------|
| 1 | chr17      | 79283915       | NA               | C17orf55         | TSS1500          |

| UCSC_CpG_Islands_Name  | Group A      |              | Group B      |              | Group C      |
|------------------------|--------------|--------------|--------------|--------------|--------------|
|                        | Average      | SD           | Average      | SD           | Average      |
| chr18:44676470-4467705 | <b>0.021</b> | 0.004        | <b>0.019</b> | 0.004        | <b>0.019</b> |
| chr18:44676470-4467705 | <b>0.060</b> | 0.010        | <b>0.059</b> | 0.010        | <b>0.061</b> |
| chr18:44676470-4467705 | <b>0.022</b> | 0.005        | <b>0.022</b> | 0.006        | <b>0.022</b> |
| chr18:44676470-4467705 | <b>0.014</b> | 0.003        | <b>0.013</b> | 0.003        | <b>0.013</b> |
| chr18:44676470-4467705 | <b>0.025</b> | 0.004        | <b>0.027</b> | 0.005        | <b>0.029</b> |
| chr18:44676470-4467705 | <b>0.017</b> | 0.003        | <b>0.016</b> | 0.004        | <b>0.017</b> |
| chr18:44676470-4467705 | <b>0.393</b> | 0.028        | <b>0.392</b> | 0.037        | <b>0.390</b> |
|                        | <b>0.079</b> | <b>0.008</b> | <b>0.078</b> | <b>0.010</b> | <b>0.079</b> |
|                        | <b>0.610</b> | 0.025        | <b>0.596</b> | 0.024        | <b>0.594</b> |
|                        | <b>0.134</b> | 0.051        | <b>0.135</b> | 0.046        | <b>0.126</b> |
|                        | <b>0.874</b> | 0.020        | <b>0.864</b> | 0.025        | <b>0.869</b> |
|                        | <b>0.539</b> | <b>0.032</b> | <b>0.532</b> | <b>0.032</b> | <b>0.530</b> |
| chr3:16306136-16306986 | <b>0.019</b> | 0.004        | <b>0.019</b> | 0.005        | <b>0.022</b> |
| chr3:16306136-16306986 | <b>0.031</b> | 0.007        | <b>0.030</b> | 0.005        | <b>0.032</b> |
| chr3:16306136-16306986 | <b>0.019</b> | 0.006        | <b>0.020</b> | 0.006        | <b>0.019</b> |
| chr3:16306136-16306986 | <b>0.017</b> | 0.005        | <b>0.017</b> | 0.005        | <b>0.018</b> |
| chr3:16306136-16306986 | <b>0.023</b> | 0.006        | <b>0.022</b> | 0.005        | <b>0.024</b> |
| chr3:16306136-16306986 | <b>0.012</b> | 0.005        | <b>0.010</b> | 0.004        | <b>0.011</b> |
| chr3:16306136-16306986 | <b>0.060</b> | 0.011        | <b>0.057</b> | 0.010        | <b>0.057</b> |
| chr3:16306136-16306986 | <b>0.039</b> | 0.008        | <b>0.037</b> | 0.007        | <b>0.039</b> |
| chr3:16306136-16306986 | <b>0.018</b> | 0.004        | <b>0.018</b> | 0.005        | <b>0.018</b> |
|                        | <b>0.515</b> | 0.108        | <b>0.525</b> | 0.083        | <b>0.550</b> |
| chr3:16306136-16306986 | <b>0.098</b> | 0.014        | <b>0.095</b> | 0.010        | <b>0.100</b> |
|                        | <b>0.896</b> | 0.015        | <b>0.902</b> | 0.019        | <b>0.897</b> |
| chr3:16306136-16306986 | <b>0.013</b> | 0.004        | <b>0.013</b> | 0.003        | <b>0.013</b> |
|                        | <b>0.915</b> | 0.031        | <b>0.916</b> | 0.025        | <b>0.908</b> |
|                        | <b>0.910</b> | 0.017        | <b>0.914</b> | 0.020        | <b>0.908</b> |
| chr3:16306136-16306986 | <b>0.943</b> | 0.015        | <b>0.930</b> | 0.021        | <b>0.932</b> |
|                        | <b>0.030</b> | 0.007        | <b>0.032</b> | 0.007        | <b>0.035</b> |
| chr3:16306136-16306986 | <b>0.830</b> | 0.028        | <b>0.825</b> | 0.025        | <b>0.819</b> |
|                        | <b>0.738</b> | 0.053        | <b>0.731</b> | 0.050        | <b>0.717</b> |
|                        | <b>0.017</b> | 0.003        | <b>0.017</b> | 0.004        | <b>0.017</b> |
| chr3:16306136-16306986 | <b>0.932</b> | 0.018        | <b>0.943</b> | 0.014        | <b>0.941</b> |
|                        | <b>0.580</b> | 0.063        | <b>0.575</b> | 0.071        | <b>0.577</b> |
|                        | <b>0.787</b> | 0.035        | <b>0.804</b> | 0.038        | <b>0.804</b> |
|                        | <b>0.974</b> | 0.008        | <b>0.971</b> | 0.011        | <b>0.969</b> |
| chr3:16306136-16306986 | <b>0.947</b> | 0.013        | <b>0.950</b> | 0.013        | <b>0.947</b> |
|                        | <b>0.732</b> | 0.075        | <b>0.735</b> | 0.065        | <b>0.738</b> |
| chr3:16306136-16306986 | <b>0.013</b> | 0.003        | <b>0.013</b> | 0.002        | <b>0.012</b> |
| chr3:16306136-16306986 | <b>0.033</b> | 0.006        | <b>0.032</b> | 0.010        | <b>0.034</b> |

|              |              |              |              |              |
|--------------|--------------|--------------|--------------|--------------|
| <b>0.045</b> | 0.016        | <b>0.053</b> | 0.018        | <b>0.049</b> |
| <b>0.386</b> | <b>0.020</b> | <b>0.386</b> | <b>0.019</b> | <b>0.386</b> |

[//2015/05/05/ije.dyv043.full.pdf+html](#)

| <b>UCSC_CpG_Islands_N</b> | <b>Mean</b>  | SD    | <b>Mean</b>  | SD    | <b>Mean</b>  |
|---------------------------|--------------|-------|--------------|-------|--------------|
|                           | <b>0.906</b> | 0.097 | <b>0.884</b> | 0.170 | <b>0.910</b> |
| chr11:3224524-3225077     | <b>0.192</b> | 0.034 | <b>0.186</b> | 0.049 | <b>0.192</b> |
|                           | <b>0.889</b> | 0.016 | <b>0.865</b> | 0.164 | <b>0.894</b> |
| chr19:290594-292249       | <b>0.835</b> | 0.044 | <b>0.817</b> | 0.155 | <b>0.837</b> |

**UCSC\_CpG\_Islands\_Name**

|                        |              |       |              |       |              |
|------------------------|--------------|-------|--------------|-------|--------------|
| tExon;5'UTR            | <b>0.280</b> | 0.032 | <b>0.264</b> | 0.063 | <b>0.280</b> |
| chr12:54764065-5476451 | <b>0.587</b> | 0.072 | <b>0.568</b> | 0.124 | <b>0.606</b> |

**UCSC\_CpG\_Islands\_Name**

|                        |              |       |              |       |              |
|------------------------|--------------|-------|--------------|-------|--------------|
| chr17:79283863-7928413 | <b>0.692</b> | 0.035 | <b>0.676</b> | 0.134 | <b>0.689</b> |
|------------------------|--------------|-------|--------------|-------|--------------|



|              | Difference A-C | Difference B-C | Difference B-A |
|--------------|----------------|----------------|----------------|
| SD           |                |                |                |
| 0.005        | 0.002          | 0.000          | -0.002         |
| 0.009        | 0.000          | -0.001         | -0.001         |
| 0.006        | 0.000          | -0.001         | 0.000          |
| 0.004        | 0.000          | 0.000          | -0.001         |
| 0.007        | -0.004         | -0.002         | 0.002          |
| 0.004        | 0.001          | -0.001         | -0.001         |
| 0.040        | 0.003          | 0.001          | -0.002         |
| <b>0.011</b> | <b>0.000</b>   | <b>-0.001</b>  | <b>-0.001</b>  |

|              |              |              |               |
|--------------|--------------|--------------|---------------|
| 0.019        | 0.016        | 0.002        | -0.014        |
| 0.042        | 0.008        | 0.010        | 0.002         |
| 0.023        | 0.006        | -0.004       | -0.010        |
| <b>0.028</b> | <b>0.010</b> | <b>0.002</b> | <b>-0.007</b> |

|       |        |        |        |
|-------|--------|--------|--------|
| 0.005 | -0.003 | -0.003 | 0.000  |
| 0.005 | -0.001 | -0.002 | -0.001 |
| 0.005 | 0.000  | 0.001  | 0.001  |
| 0.005 | 0.000  | -0.001 | -0.001 |
| 0.007 | -0.001 | -0.002 | -0.001 |
| 0.004 | 0.000  | -0.001 | -0.002 |
| 0.012 | 0.004  | 0.000  | -0.004 |
| 0.007 | 0.000  | -0.002 | -0.002 |
| 0.003 | 0.000  | 0.000  | 0.000  |
| 0.088 | -0.034 | -0.024 | 0.010  |
| 0.012 | -0.002 | -0.005 | -0.003 |
| 0.018 | -0.001 | 0.005  | 0.006  |
| 0.004 | -0.001 | -0.001 | 0.000  |
| 0.029 | 0.007  | 0.008  | 0.001  |
| 0.017 | 0.002  | 0.007  | 0.005  |
| 0.024 | 0.010  | -0.002 | -0.012 |
| 0.009 | -0.005 | -0.003 | 0.002  |
| 0.022 | 0.011  | 0.006  | -0.005 |
| 0.060 | 0.021  | 0.014  | -0.007 |
| 0.003 | 0.000  | 0.000  | 0.001  |
| 0.015 | -0.010 | 0.001  | 0.011  |
| 0.071 | 0.003  | -0.002 | -0.005 |
| 0.032 | -0.016 | 0.000  | 0.016  |
| 0.011 | 0.005  | 0.002  | -0.003 |
| 0.010 | 0.000  | 0.002  | 0.002  |
| 0.061 | -0.006 | -0.004 | 0.003  |
| 0.004 | 0.001  | 0.001  | -0.001 |
| 0.006 | -0.001 | -0.002 | -0.001 |

|              |               |              |              |
|--------------|---------------|--------------|--------------|
| 0.017        | -0.003        | 0.005        | 0.008        |
| <b>0.020</b> | <b>-0.001</b> | <b>0.000</b> | <b>0.001</b> |

| SD    | Difference A-C | Difference B-C | Difference B-A |
|-------|----------------|----------------|----------------|
| 0.092 | -0.004         | -0.026         | -0.022         |
| 0.047 | 0.000          | -0.006         | -0.007         |
| 0.017 | -0.005         | -0.030         | -0.025         |
| 0.044 | -0.001         | -0.020         | -0.019         |

|       |        |        |        |
|-------|--------|--------|--------|
| 0.027 | 0.000  | -0.016 | -0.016 |
| 0.058 | -0.020 | -0.039 | -0.019 |

|       |       |        |        |
|-------|-------|--------|--------|
| 0.050 | 0.003 | -0.013 | -0.016 |
|-------|-------|--------|--------|
